# Supplementary material
Source: publisher figshare collection journal article supplement (https://acs.figshare.com/ndownloader/files/18601610)
Supplement: Supplementary file 1 [file 18601610]

# Supporting Information

## Improved Bimetallic Cobalt-Manganese Catalysts for Selective Oxidative Cleavage of Morpholine Derivatives

David K. Leonard, Wu Li, Kathrin Junge, and Matthias Beller\*

Leibniz-Institut für Katalyse e.V. an der Universität Rostock, Albert–Einstein Straße 29a,  
18059 Rostock, Germany

\*Correspondence to: matthias.beller@catalysis.de

### CONTENTS

1. General Experimental Details
2. General Procedure for the Synthesis of Substrates (**GP-A**)
3. General Procedure for Catalytic Oxidations (**GP-B & GP-C**)
4. Catalytic Experiments
5. Mechanistic Studies
6. Characterization Data for the Substrates
7. Characterization Data for the Products
8.  $^1\text{H}$  NMR,  $^{13}\text{C}$  NMR Spectra for Substrates
9.  $^1\text{H}$  NMR,  $^{13}\text{C}$  NMR &  $^{19}\text{F}$  Spectra for Products
10. GC-FID Calibrations
11. References

## 1. GENERAL EXPERIMENTAL DETAILS

- Most morpholines were obtained from commercial sources and used as supplied; others were prepared as detailed below.
- All metal catalysts were obtained from commercial sources and used as supplied
- Unless otherwise mentioned, all catalytic oxidation reactions were carried out in 4 mL glass vials, which were set in an alloy plate and placed inside 300 mL autoclave (Parr Instrument Company).
- All oxidation reactions were performed in a Parr® Instrument Company autoclave.
- Deuterated solvents were ordered from Deutero GmbH. NMR spectra were received using Bruker 300 Fourier, Bruker AV 300 and Bruker AV 400 spectrometers. Chemical shifts are reported in ppm, relative to the deuterated solvent. Coupling constants are expressed in Hertz (Hz). The following abbreviations are used: s = singlet, d = doublet, t = triplet, and m = multiplet. The residual solvent signals were used as references for  $^1\text{H}$  and  $^{13}\text{C}$  NMR spectra ( $\text{CDCl}_3$ :  $\delta\text{H} = 7.26$  ppm,  $\delta\text{C} = 77.12$  ppm;  $\text{DMSO}-d_6$ :  $\delta\text{H} = 2.50$  ppm,  $\delta\text{C} = 39.52$  ppm). All measurements were carried out at room temperature unless otherwise stated.
- GC-FID analyses were carried out using an Agilent 7890B gas chromatograph fitted with an Agilent HP5 column (30 m x 0.25 mm I.D. x 0.25  $\mu\text{m}$ ).
- High resolution mass spectra (HRMS) were obtained either from a MAT 95 XP from Thermo (EI) or from an HPLC system 1200 and downstream ESI-TOF-MS 6210 from Agilent (ESI).
- Solvents were used directly without further purification. HPLC grade MeCN was supplied by Fisher Chemical. Linezolid was obtained from Gute Chemie–abcr.

## 2. GENERAL PROCEDURE FOR THE SYNTHESIS OF SUBSTRATES

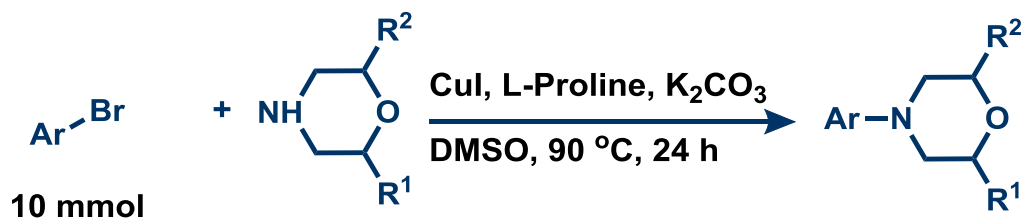

1. **General Procedure A (GP-A).** A mixture of aryl bromide (10 mmol), morpholines (20 mmol),  $K_2CO_3$  (20 mmol), CuI (1.0 mmol) and L-proline (2.0 mmol) in 10 mL of DMSO was heated at 90 °C and for 24 h. The cooled mixture was partitioned between water and ethyl acetate. The organic layer was separated, and the aqueous layer was extracted with ethyl acetate. The combined organic layers were dried over  $Na_2SO_4$ , and concentrated in vacuo. The desired products were isolated by silica gel column chromatography (*n*-heptane/ethyl acetate mixtures). (Ma, D.; Cai, Q; Zhang, H., Mild Method for Ullmann Coupling Reaction of Amines and Aryl Halides. *Org. Lett.*, **2003**, 5, 2453–2455.)

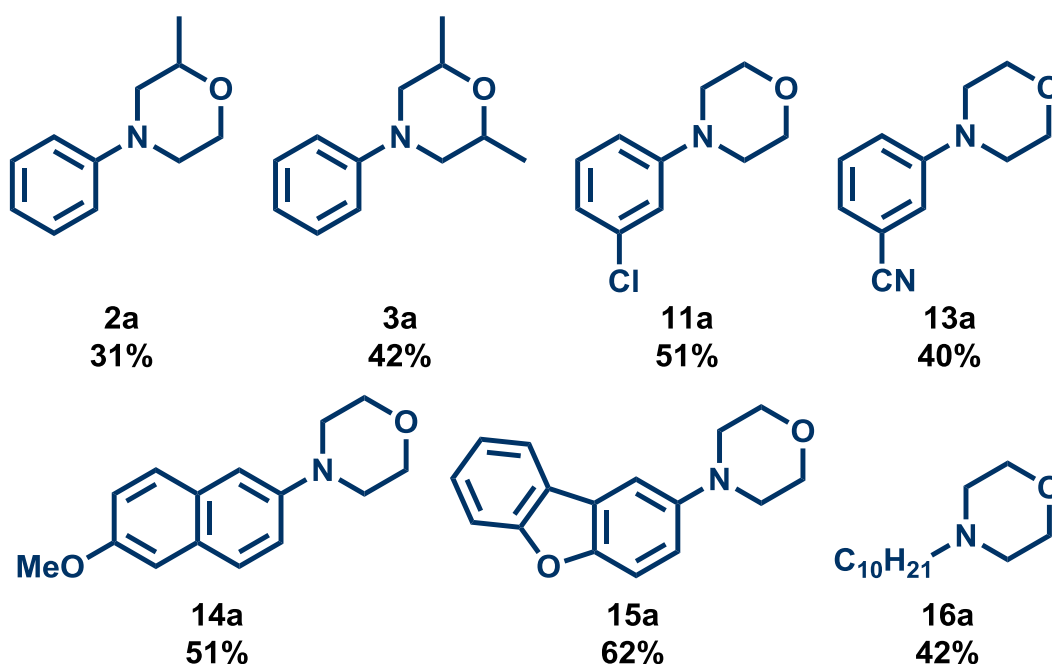

### 3. GENERAL PROCEDURE FOR CATALYTIC OXIDATIONS

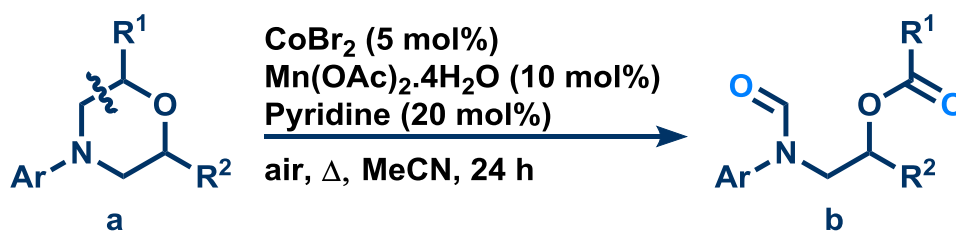

**General Procedure B (GP-B).** To a 4 mL glass vial equipped with a magnetic stir bar, aryl morpholine (0.5 mmol), Mn(OAc)<sub>2</sub>·4H<sub>2</sub>O (6.1 mg; 5 mol%) and CoBr<sub>2</sub> (10.9 mg; 10 mol%) were added. The vial was capped and pierced with a small needle. HPLC grade acetonitrile (2 mL) was added *via* a 2 mL syringe. Pyridine (8 μL; 20 mol%) was added via a glass microsyringe. The vial was then placed into an aluminium heating block and then sealed inside an autoclave (Parr<sup>®</sup> Instrument Company). The autoclave was then pressurized with air (20 bar). The reaction mixture was stirred for 24 hours at 60 °C. Next, the reaction was cooled to room temperature. A sample of the reaction mixture was analyzed by GC-FID and using TLC. The product was purified via flash column chromatography (RediSep<sup>®</sup> Rf+ automatic column) using heptane/ethyl acetate. Solvent was removed *in vacuo* to yield the desired product.

**General Procedure C (GP-C).** To a 4 mL glass vial equipped with a magnetic stir bar, aryl morpholine (0.5 mmol), Mn(OAc)<sub>2</sub>·4H<sub>2</sub>O (6.1 mg; 5 mol%) and CoBr<sub>2</sub> (10.9 mg; 10 mol%) were added. The vial was capped and pierced with a small needle. HPLC grade acetonitrile (2 mL) was added *via* a 2 mL syringe. Pyridine (8 μL; 20 mol%) was added via a glass microsyringe. The vial was then placed into an aluminium heating block and then sealed inside an autoclave (Parr<sup>®</sup> Instrument Company). The autoclave was then pressurized with air (30 bar). The reaction mixture was stirred for 24 hours at 100 °C. Next, the reaction was cooled to room temperature. A sample of the reaction mixture was analyzed by GC-FID and using TLC. The product was purified via flash column chromatography (RediSep<sup>®</sup> Rf+ automatic column) using heptane/ethyl acetate. Solvent was removed *in vacuo* to yield the desired product.

**General Procedure D (GP-D).** To a 4 mL glass vial equipped with a magnetic stir bar, aryl morpholine (0.5 mmol), Mn(OAc)<sub>2</sub>·4H<sub>2</sub>O (6.1 mg; 5 mol%) and CoBr<sub>2</sub> (10.9 mg; 10 mol%)

were added. The vial was capped and pierced with a small needle. HPLC grade acetonitrile (2 mL) was added *via* a 2 mL syringe. Pyridine (8  $\mu$ L; 20 mol%) was added via a glass microsyringe. The vial was then placed into an aluminium heating block and then sealed inside an autoclave (Parr<sup>®</sup> Instrument Company). The autoclave was then pressurized with air (20 bar). The reaction mixture was stirred for 24 hours at 120 °C. Next, the reaction was cooled to room temperature. A sample of the reaction mixture was analyzed by GC-FID and using TLC. The product was purified via flash column chromatography (RediSep<sup>®</sup> Rf+ automatic column) using heptane/ethyl acetate. Solvent was removed *in vacuo* to yield the desired product.

## 4. CATALYTIC EXPERIMENTS

**Table S1.** Selective cleavage of C-C single bond of *N*-phenylmorpholine using different catalysts.

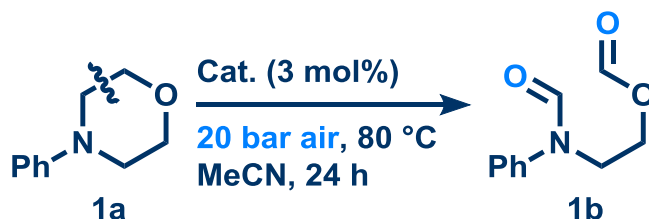

| entry | catalyst                                | yield (%) <sup>a</sup> |
|-------|-----------------------------------------|------------------------|
| 1     | Pd(OAc) <sub>2</sub>                    | 0                      |
| 2     | Ru(acac) <sub>3</sub>                   | 22                     |
| 3     | RuCl <sub>3</sub>                       | 44                     |
| 4     | Fe(OAc) <sub>2</sub>                    | 0                      |
| 5     | Co(OAc) <sub>2</sub> ·4H <sub>2</sub> O | 0                      |
| 6     | AgCF <sub>3</sub> SO <sub>3</sub>       | 0                      |
| 7     | Ag <sub>2</sub> CO <sub>3</sub>         | 0                      |
| 8     | Mn(OAc) <sub>2</sub> ·4H <sub>2</sub> O | 30                     |
| 9     | Mn(acac) <sub>2</sub>                   | 0                      |

Reaction conditions: **1a** (0.5 mmol), catalyst (3 mol%) in MeCN (2 mL), 20 bar air, 80 °C, 24 h. <sup>a</sup>Yields determined by GC-FID using *n*-dodecane as an internal standard.

**Table S2.** Optimizing temperature and pressure for selective cleavage of C-C single bond of *N*-phenylmorpholine.

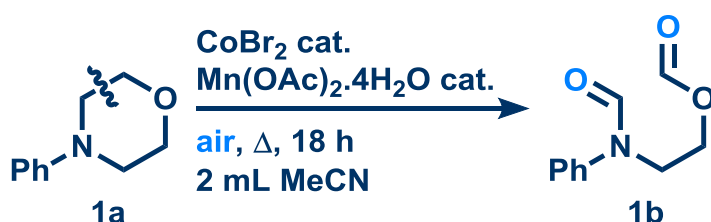

| entry | temperature / °C | pressure / bar | yield <b>1b</b> (%) <sup>a</sup> |
|-------|------------------|----------------|----------------------------------|
| 1     | r.t.             | 20             | trace                            |
| 2     | 40               | 10             | 44                               |
| 3     | 40               | 20             | 72                               |
| 4     | 60               | 20             | >99 <sup>b</sup>                 |

Reaction conditions: **1a** (0.5 mmol), CoBr<sub>2</sub> (10 mol%), Mn(OAc)<sub>2</sub>·4H<sub>2</sub>O (5 mol%) in MeCN (2 mL), 18 h. <sup>a</sup>Yields determined by GC-FID using *n*-dodecane as an internal standard.  
<sup>b</sup>Reaction stopped after 16 h.

**Table S3.** Optimizing of catalysts and ligand for selective cleavage of C-C single bond of *N*-phenylmorpholine.

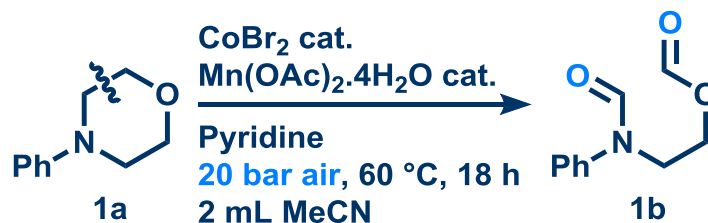

| entry | pyridine / mol% | CoBr <sub>2</sub> / mol% | Mn(OAc) <sub>2</sub> ·4H <sub>2</sub> O / mol% | yield <b>1b</b> (%) <sup>a</sup> |
|-------|-----------------|--------------------------|------------------------------------------------|----------------------------------|
| 1     | 20              | 5                        | 5                                              | 91                               |
| 2     | 20              | 10                       | 5                                              | >99 <sup>b</sup>                 |
| 3     | 10              | 10                       | 5                                              | 85                               |

Reaction conditions: **1a** (0.5 mmol), CoBr<sub>2</sub> and Mn(OAc)<sub>2</sub>·4H<sub>2</sub>O in MeCN (2 mL), 20 bar air, 60 °C, 18 h. <sup>a</sup>Yields determined by GC-FID using *n*-dodecane as an internal standard.  
<sup>b</sup>Reaction stopped after 16 h.

#### Reaction using low pressure air.

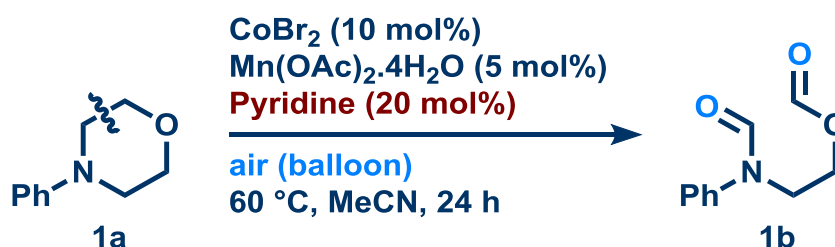

**1b** was not detected, nor were any potential intermediates.

**Reaction using N<sub>2</sub>O gas.** To a 4 mL glass vial equipped with a magnetic stir bar, **1a** (0.5 mmol), Mn(OAc)<sub>2</sub>·4H<sub>2</sub>O (6.1 mg; 5 mol%) and CoBr<sub>2</sub> (10.9 mg; 10 mol%) were added. The vial was capped and pierced with a small needle. HPLC grade acetonitrile (2 mL) was added *via* a syringe. Pyridine (8 μL; 20 mol%) was added via a glass microsyringe. The vial was then placed into an aluminium heating block and then sealed inside an autoclave (Parr Instrument Company). The autoclave was then pressurized with N<sub>2</sub>O (6 bar). The reaction mixture was stirred overnight for 17 hours at 60 °C. Next, the reaction was cooled to room temperature. A sample of the reaction mixture was analyzed by GC-FID using *n*-dodecane as an internal standard.

**Table S4.** Comparison between air and N<sub>2</sub>O as oxidant.

| entry | oxidant (6 bar)  | yield 1b (%) |
|-------|------------------|--------------|
| 1     | N <sub>2</sub> O | 0            |
| 2     | Air              | 80           |

<sup>a</sup>Yields determined by GC-FID using *n*-dodecane as an internal standard.



## 5. MECHANISTIC STUDIES

**Radical trapping experiment using TEMPO.** To a 4 mL glass vial equipped with a magnetic stir bar, **1a** (0.5 mmol), Mn(OAc)<sub>2</sub>·4H<sub>2</sub>O (6.1 mg; 5 mol%), CoBr<sub>2</sub> (10.9 mg; 10 mol%) and TEMPO (0.1-1.0 equiv.) were added. The vial was capped and pierced with a small needle. HPLC grade acetonitrile (2 mL) was added *via* a 2 mL syringe. Pyridine (8 µL; 20 mol%) was added via a glass microsyringe. The vial was then placed into an aluminium heating block and then sealed inside an autoclave (Parr Instrument Company). The autoclave was then pressurized with air (20 bar). The reaction mixture was stirred for 24 hours at 60 °C. Next, the reaction was cooled to room temperature. A sample of the reaction mixture was analyzed by GC-FID using *n*-dodecane as an internal standard.

**Table S5.** Reaction of *N*-phenylmorpholine with TEMPO under oxidation conditions.

| entry | TEMPO (equiv.) | yield <b>1b</b> (%) |
|-------|----------------|---------------------|
| 1     | 0.1            | 0                   |
| 2     | 0.2            | 0                   |
| 3     | 0.5            | 0                   |
| 4     | 1.0            | 0                   |

<sup>a</sup>Yields determined by GC-FID using *n*-dodecane as an internal standard.

**1b** was not detected. Trace of a potential intermediate (m/z: 161) was detected by GC-MS (Figures S1-S4).

**Figure S1.** GC chromatogram of radical trapping experiment starting from **1a** and TEMPO (20 mol%).

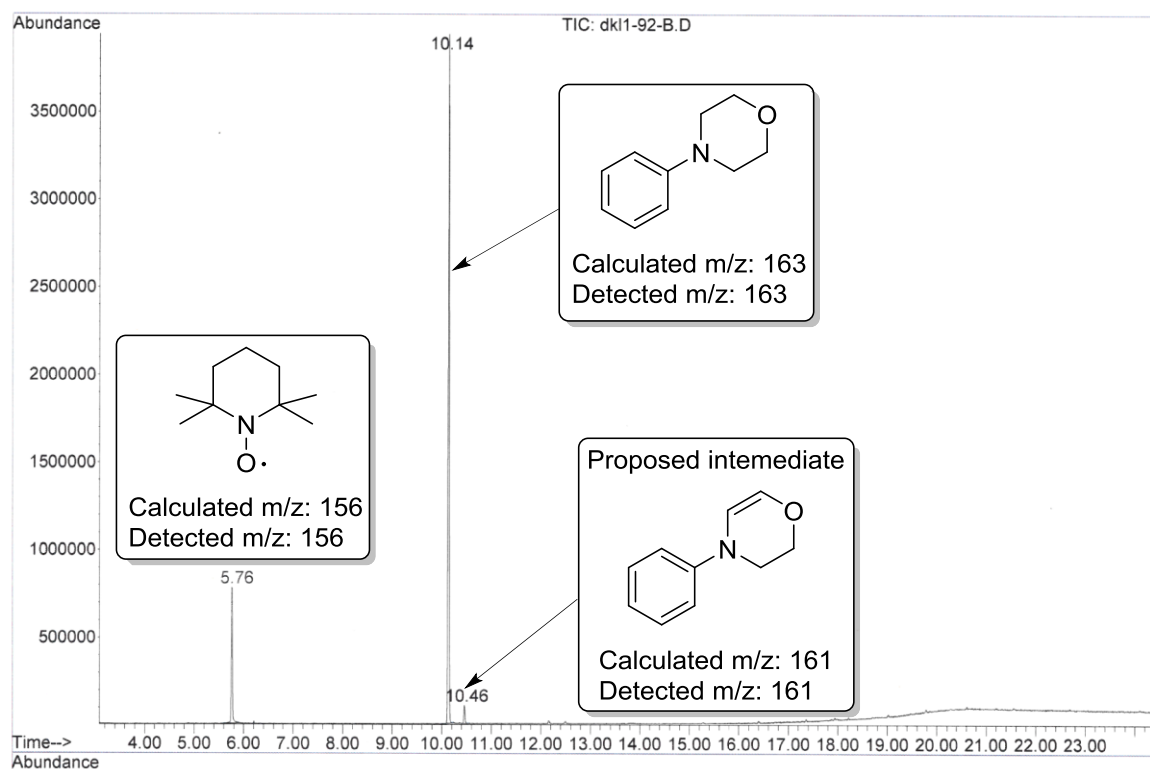

**Figure S2.** Mass spectrum of **1a** with retention time = 10.14 min.

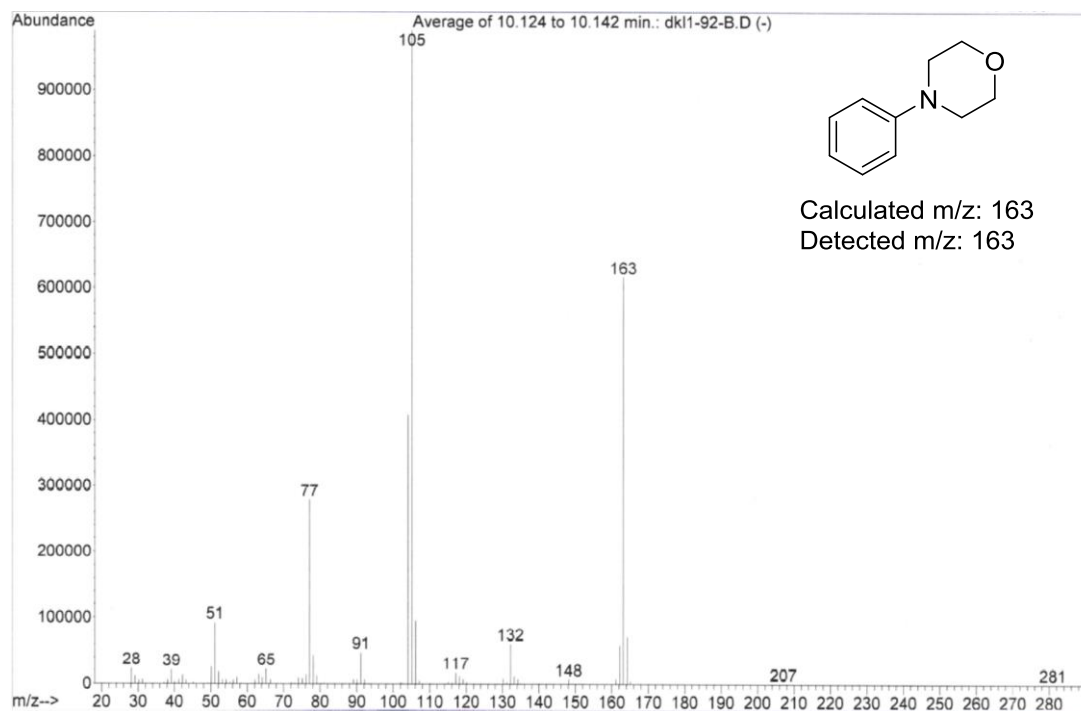

**Figure S3.** Mass spectrum of potential intermediate, starting from **1a**, with retention time = 10.46 min.

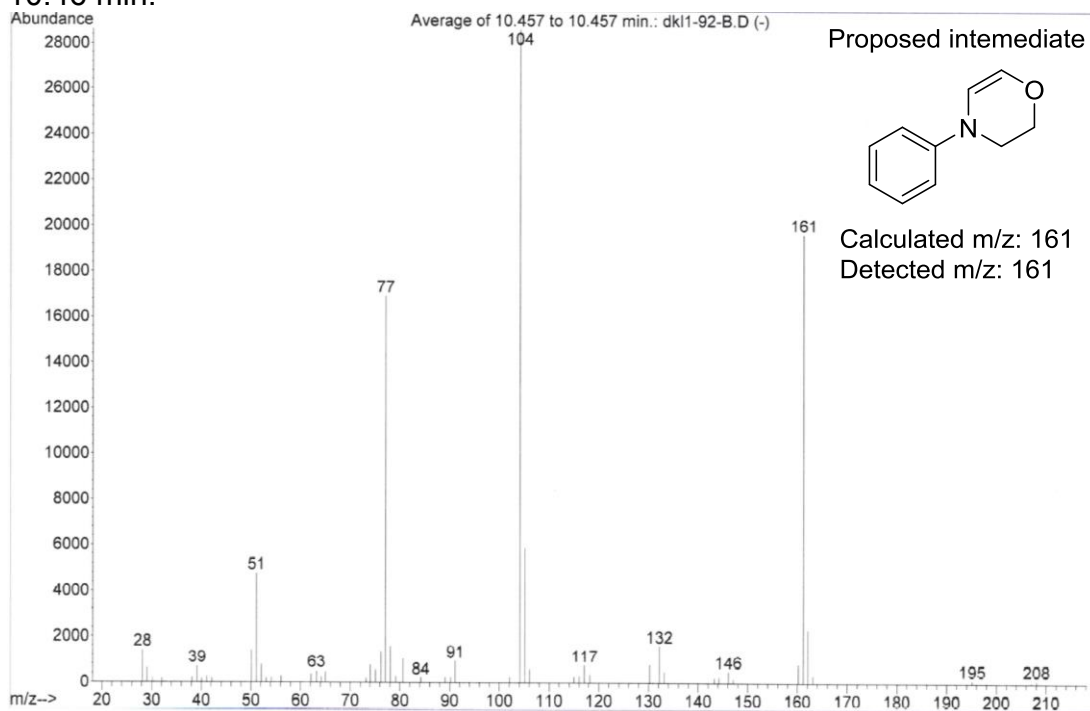

**Figure S4.** Mass spectrum of TEMPO with retention time = 5.76 min.

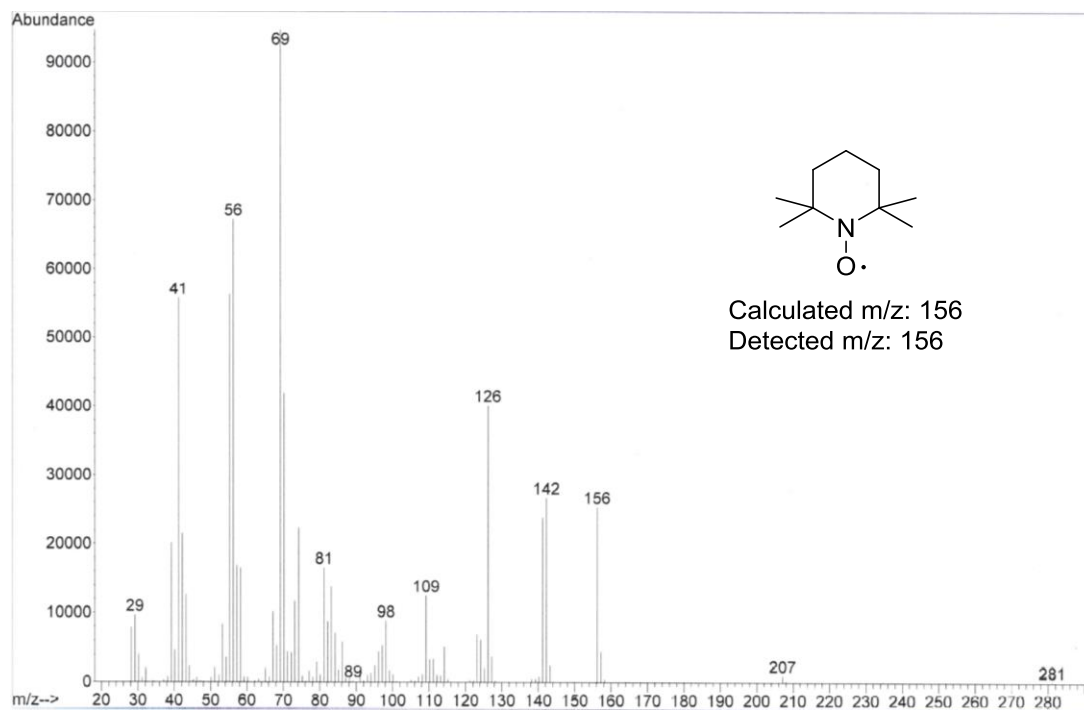

The radical trapping experiment was repeated using substrate **2a**. A corresponding potential intermediate ( $m/z$ : 175) was detected using GC-MS (Figure 7).

**Figure S5.** GC chromatogram of radical trapping experiment starting from **2a** and TEMPO (20 mol%).

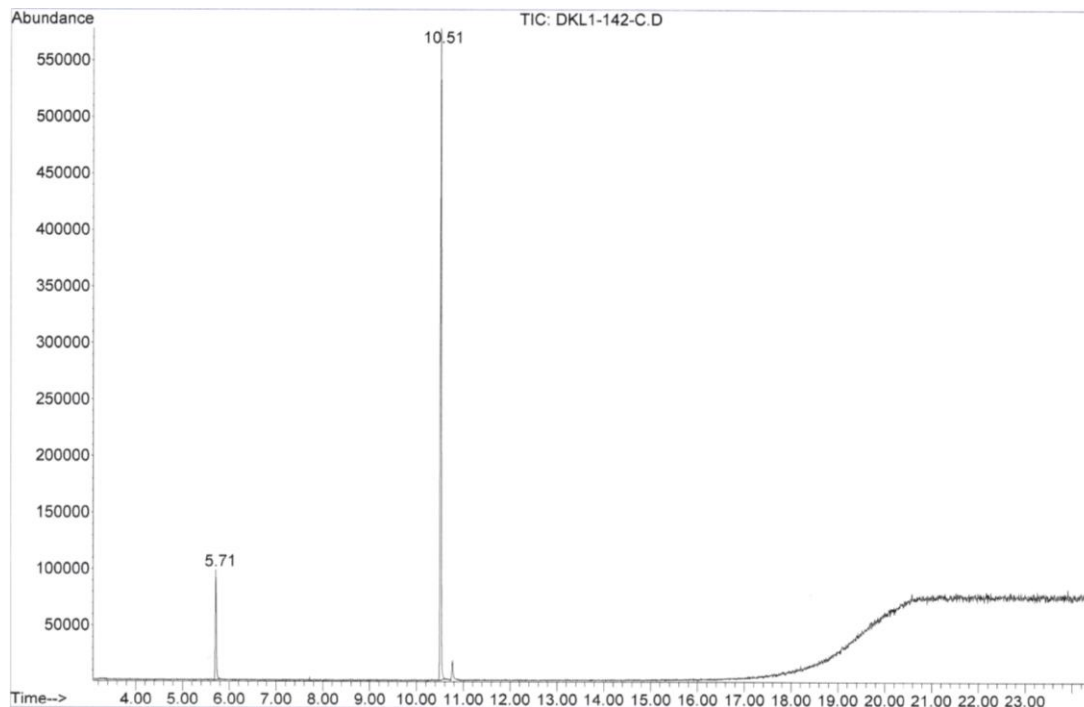

**Figure S6.** Mass spectrum of **2a** with retention time = 10.51 min.

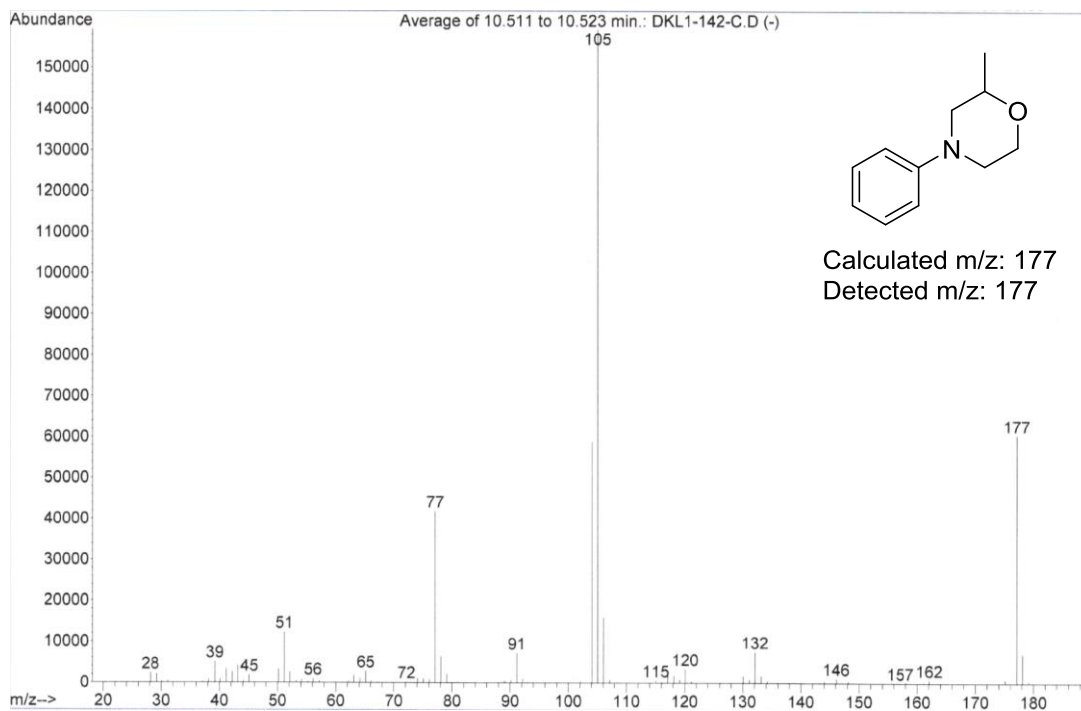

**Figure S7.** Mass spectrum of potential intermediate, starting from **2a**, with retention time = 10.88 min.

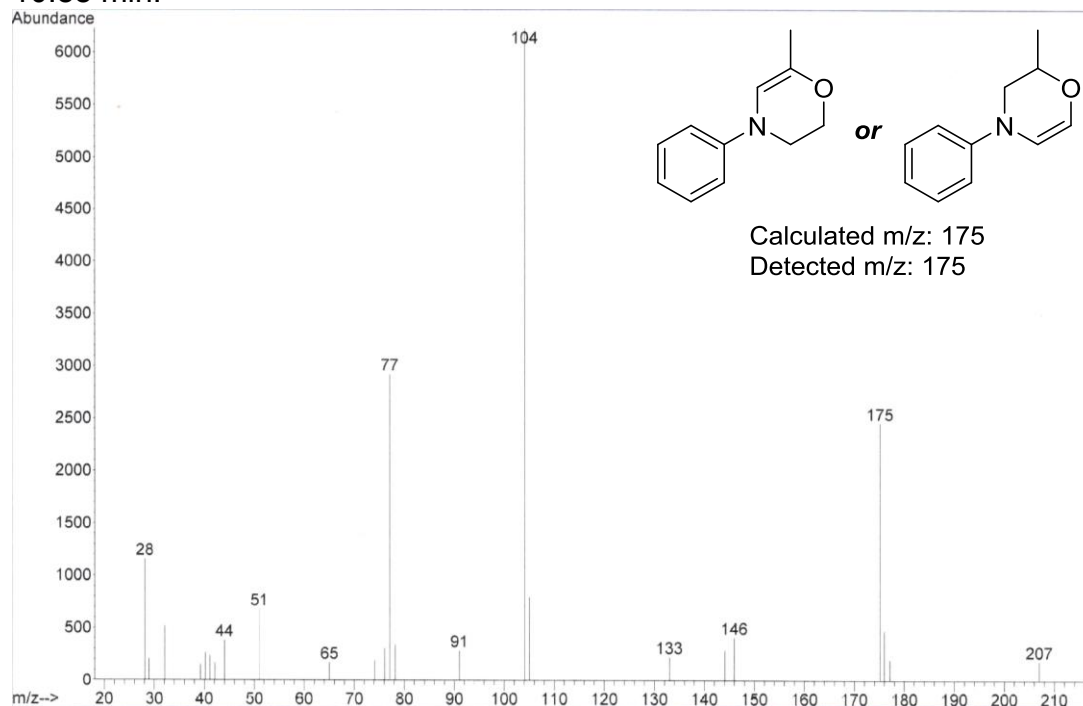

**Radical trapping experiment using C<sub>10</sub>F<sub>21</sub>I.** To a 4 mL glass vial equipped with a magnetic stir bar, **1a** (0.5 mmol), Mn(OAc)<sub>2</sub>·4H<sub>2</sub>O (6.1 mg; 5 mol%), CoBr<sub>2</sub> (10.9 mg; 10 mol%) and C<sub>10</sub>F<sub>21</sub>I (1.0 equiv.) were added. The vial was capped and pierced with a small needle. HPLC grade acetonitrile (2 mL) was added *via* a 2 mL syringe. Pyridine (8 μL; 20 mol%) was added via a glass microsyringe. The vial was then placed into an aluminium heating block and then sealed inside an autoclave (Parr Instrument Company). The autoclave was then pressurized with air (20 bar). The reaction mixture was stirred for 24 hours at 60 °C. Next, the reaction was cooled to room temperature. A sample of the reaction mixture was analyzed by GC-FID using *n*-dodecane as an internal standard.

**No potential trapped intermediates were detected by GC-FID.**

## 6. CHARACTERIZATION DATA FOR THE SUBSTRATES

### 2-methyl-4-phenylmorpholine (2a)

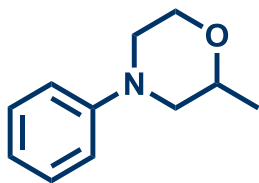

$^1\text{H}$  NMR (300 MHz,  $\text{CDCl}_3$ ):  $\delta$  (ppm) 7.40–7.23 (m, 2H), 7.05–6.87 (m, 3H), 4.05 (ddd,  $J$  = 11.4, 3.5, 1.6 Hz, 1H), 3.89–3.68 (m, 2H), 3.56–3.30 (m, 2H), 2.86 (td,  $J$  = 11.8, 3.5 Hz, 1H), 2.52 (dd,  $J$  = 11.8, 10.2 Hz, 1H), 1.29 (d,  $J$  = 6.3 Hz, 3H).

$^{13}\text{C}\{^1\text{H}\}$  NMR (75 MHz,  $\text{CDCl}_3$ ):  $\delta$  (ppm) 151.24, 129.29, 120.05, 115.89, 71.90, 66.85, 55.73, 48.71, 19.19.

**HR-MS** (EI)  $m/z$  calcd for  $\text{C}_{11}\text{H}_{15}\text{NO}$  [ $\text{M}^+$ ]: 177.1148, found: 177.1149.

### 2,6-dimethyl-4-phenylmorpholine (3a)

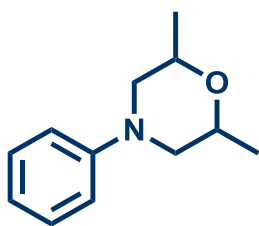

$^1\text{H}$  NMR (300 MHz,  $\text{CDCl}_3$ ):  $\delta$  (ppm) 7.37–7.26 (m, 2.67H), 7.05–6.74 (m, 3.54H), 4.19 (td,  $J$  = 6.3, 3.3 Hz, 0.43H), 3.84 (dq,  $J$  = 10.4, 6.3, 2.4 Hz, 2H), 3.48 (ddd,  $J$  = 11.1, 2.3, 1.2 Hz, 2H), 3.33–3.12 (m, 0.42H), 2.91 (ddd,  $J$  = 11.8, 6.1, 1.0 Hz, 0.40H), 2.60–2.25 (m, 2H), 1.29 (d,  $J$  = 6.3 Hz, 6H).

$^{13}\text{C}\{^1\text{H}\}$  NMR (75 MHz,  $\text{CDCl}_3$ ):  $\delta$  (ppm) 150.69, 128.89, 119.49, 115.59, 115.49, 71.38, 66.20, 54.58, 54.04, 18.81, 17.79.

#### 4-(3-chlorophenyl)morpholine (11a)

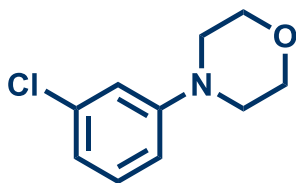

$^1\text{H}$  NMR (300 MHz,  $\text{CDCl}_3$ ):  $\delta$  (ppm) 7.22–7.11 (m, 1H), 6.91–6.70 (m, 3H), 3.90–3.77 (m, 4H), 3.24–3.07 (m, 4H).

$^{13}\text{C}\{^1\text{H}\}$  NMR (75 MHz,  $\text{CDCl}_3$ ):  $\delta$  (ppm) 152.41, 135.10, 130.17, 119.74, 115.56, 113.66, 66.80, 48.93.

#### 3-morpholinobenzonitrile (13a)

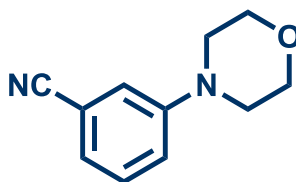

$^1\text{H}$  NMR (300 MHz,  $\text{CDCl}_3$ ):  $\delta$  (ppm) 7.33 (dd,  $J = 9.2, 7.4$  Hz, 1H), 7.17–7.03 (m, 3H), 3.94–3.74 (m, 4H), 3.26–3.09 (m, 4H).

$^{13}\text{C}\{^1\text{H}\}$  NMR (75 MHz,  $\text{CDCl}_3$ ):  $\delta$  (ppm) 151.41, 130.05, 123.02, 119.70, 119.35, 118.23, 113.12, 66.67, 48.52.

#### 4-(6-Methoxynaphthalen-2-yl)morpholine (14a)

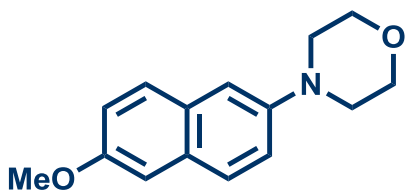

$^1\text{H}$  NMR (400 MHz,  $\text{CDCl}_3$ ):  $\delta$  (ppm) 7.73–7.59 (m, 2H), 7.32–7.22 (m, 1H), 7.20–7.07 (m, 3H), 4.01–3.88 (m, 7H), 3.33–3.14 (m, 4H).

$^{13}\text{C}\{^1\text{H}\}$  NMR (101 MHz,  $\text{CDCl}_3$ ):  $\delta$  (ppm) 156.30, 147.70, 129.86, 129.69, 128.41, 127.75, 119.75, 119.01, 110.82, 105.90, 67.08, 55.38, 50.33.

#### 4-(Dibenzo[b,d]furan-2-yl)morpholine (15a)

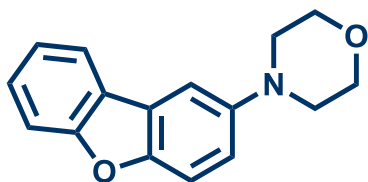

$^1\text{H}$  NMR (400 MHz,  $\text{CDCl}_3$ ):  $\delta$  (ppm) 7.83 (ddd,  $J = 7.7, 1.4, 0.7$  Hz, 1H), 7.46 (dt,  $J = 8.3, 0.9$  Hz, 1H), 7.43–7.32 (m, 3H), 7.29–7.20 (m, 1H), 7.04 (dd,  $J = 9.0, 2.5$  Hz, 1H), 4.07–3.73 (m, 4H), 3.28–3.01 (m, 4H).

$^{13}\text{C}\{^1\text{H}\}$  NMR (101 MHz,  $\text{CDCl}_3$ ):  $\delta$  (ppm) 156.92, 151.44, 127.18, 124.80, 124.57, 122.57, 120.60, 117.98, 112.06, 111.84, 107.92, 67.18, 51.51.

**HR-MS** (ESI):  $m/z$  calculated for  $\text{C}_{16}\text{H}_{15}\text{NO}_2$  ( $[\text{M}+\text{H}]^+$ ): 254.1176, found: 254.1176.

#### 4-Decylmorpholine (16a)

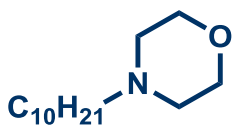

$^1\text{H}$  NMR (400 MHz,  $\text{CDCl}_3$ )  $\delta$  3.74 – 3.67 (m, 4H), 2.42 (dd,  $J = 4.2, 2.3$  Hz, 4H), 2.34 – 2.27 (m, 2H), 1.52 – 1.42 (m, 2H), 1.33 – 1.20 (m, 14H), 0.91 – 0.83 (m, 3H).

$^{13}\text{C}\{^1\text{H}\}$  NMR (101 MHz,  $\text{CDCl}_3$ )  $\delta$  67.15, 59.41, 53.95, 32.04, 29.72, 29.46, 27.68, 26.71, 22.82, 14.26.



## 7. CHARACTERIZATION DATA FOR THE PRODUCTS

### 2-(*N*-phenylformamido)ethyl formate (**1b**)

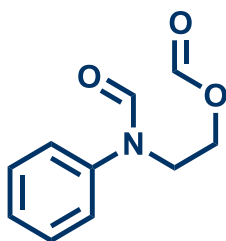

According to **GP-B**, the product **1b** was obtained as a yellow oil (93 mg, 0.48 mmol, 96%).

$^1\text{H}$  NMR (400 MHz,  $\text{CDCl}_3$ ):  $\delta$  (ppm) 8.40 (s, 1H), 7.97 (t,  $J = 0.7$  Hz, 1H), 7.46 – 7.40 (m, 2H), 7.35 – 7.30 (m, 1H), 7.23 – 7.18 (m, 2H), 4.34 (t,  $J = 5.7$ , 2H), 4.10 (t,  $J = 5.6$  Hz, 2H).

$^{13}\text{C}\{^1\text{H}\}$  NMR (75 MHz,  $\text{CDCl}_3$ ):  $\delta$  (ppm) 44.15, 60.61, 124.44, 127.31, 129.80, 140.58, 160.54, 162.64

These data are consistent with the literature.<sup>2</sup>

### 1-(*N*-phenylformamido)propan-2-yl formate (**2b** & **2c**)

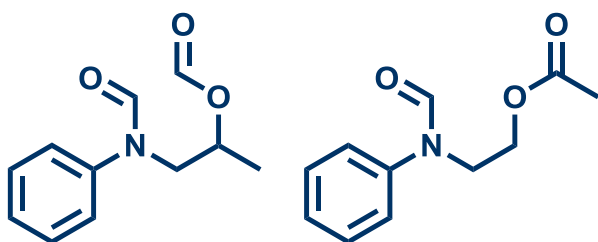

According to **GP-B**, the product mixture of **2b** and **2c** was obtained as a yellow oil (104 mg, 0.50 mmol, >99%).

$^1\text{H}$  NMR (300 MHz,  $\text{CDCl}_3$ ):  $\delta$  (ppm) 8.39 (d,  $J = 3.8$  Hz, 1H), 7.88 (s, 1H), 7.47 – 7.37 (m, 2H), 7.35 – 7.27 (m, 1H), 7.23 – 7.14 (m, 2H), 5.25 (m,  $J = 7.5, 6.4, 4.4, 1.0$  Hz, 1H), 4.24 (t,  $J = 5.5$  Hz, 1H), 4.10 – 3.91 (m, 2H), 1.90 (s, 1H), 1.28 (d,  $J = 6.4$ , 3H).

$^{13}\text{C}\{^1\text{H}\}$  NMR (75 MHz,  $\text{CDCl}_3$ ):  $\delta$  (ppm) 162.96, 160.46, 141.01, 129.91, 127.33, 124.43, 68.46, 61.49, 49.16, 44.39, 20.79, 17.94.

These data are consistent with the literature.<sup>2</sup>

### 1-(*N*-phenylformamido)propan-2-yl acetate (**3b**)

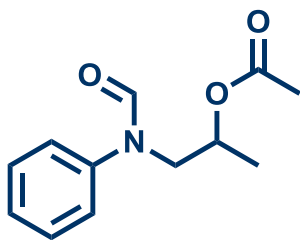

According to **GP-B**, the product **3b** was obtained as a yellow oil (73 mg, 0.33 mmol, 66%).

$^1\text{H}$  NMR (300 MHz,  $\text{CDCl}_3$ ):  $\delta$  (ppm) 8.37 (s, 1H), 7.45 – 7.38 (m, 2H), 7.33 – 7.26 (m, 1H), 7.21 – 7.15 (m, 2H), 5.18 – 5.05 (m, 1H), 4.07 – 3.89 (m, 2H), 1.76 (s, 3H), 1.23 (d,  $J$  = 6.4 Hz, 3H).

$^{13}\text{C}\{^1\text{H}\}$  NMR (75 MHz,  $\text{CDCl}_3$ ):  $\delta$  (ppm) 170.49, 162.91, 141.36, 129.83, 127.10, 124.40, 68.92, 48.94, 21.04, 17.93.

These data are consistent with the literature.<sup>2</sup>

### 2-(*N*-*p*-tolylformamido)ethyl formate (**4b**)

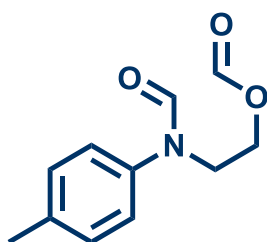

According to **GP-B**, the product **4b** was obtained as a yellow oil (88 mg, 0.43 mmol, 85%).

$^1\text{H}$  NMR (300 MHz,  $\text{CDCl}_3$ ):  $\delta$  (ppm) 8.33 (s, 1H), 7.95 (p,  $J$  = 0.7 Hz, 1H), 7.24 – 7.17 (m, 2H), 7.10 – 7.04 (m, 2H), 4.30 (td,  $J$  = 5.7, 0.8 Hz, 2H), 4.05 (dd,  $J$  = 6.0, 5.3 Hz, 2H), 2.35 (s, 3H).

$^{13}\text{C}\{^1\text{H}\}$  NMR (75 MHz,  $\text{CDCl}_3$ ):  $\delta$  (ppm) 162.77, 160.64, 138.05, 137.43, 130.24, 124.66, 60.66, 44.26, 20.99.

These data are consistent with the literature.<sup>2</sup>

### 2-(*N*-(4-nitrophenyl)formamido)ethyl formate (**5b**)

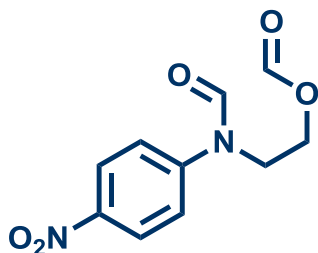

According to **GP-C**, the product **5b** was obtained as a yellow oil (51 mg, 0.22 mmol, 43%).

$^1\text{H}$  NMR (300 MHz,  $\text{CDCl}_3$ ):  $\delta$  (ppm) 8.53 (s, 1H), 7.95 (t,  $J = 0.7$  Hz, 1H), 7.77 – 7.68 (m, 2H), 7.38 – 7.30 (m, 2H), 4.43 – 4.34 (m, 2H), 4.19 – 4.10 (m, 2H).

$^{13}\text{C}\{^1\text{H}\}$  NMR (75 MHz,  $\text{CDCl}_3$ ):  $\delta$  (ppm) 161.80, 160.40, 144.77, 133.91, 123.26, 110.43, 60.61, 44.02

These data are consistent with the literature.<sup>2</sup>

### 2-(*N*-(4-acetylphenyl)formamido)ethyl formate (**6b**)

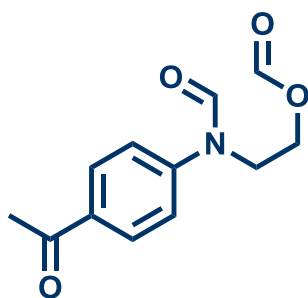

According to **GP-C**, the product **6b** was obtained as a yellow oil (91 mg, 0.39 mmol, 77%).

$^1\text{H}$  NMR (300 MHz,  $\text{CDCl}_3$ ):  $\delta$  (ppm) 8.53 (s, 1H), 8.03 – 7.99 (dt, 2H), 7.95 (t,  $J = 0.7$  Hz, 1H), 7.32 – 7.27 (dt,  $J = 8.8, 2.0$  Hz, 2H), 4.36 (t,  $J = 5.5$  Hz, 2H), 4.15 (t,  $J = 5.6$  Hz, 2H).

$^{13}\text{C}\{^1\text{H}\}$  NMR (75 MHz,  $\text{CDCl}_3$ ):  $\delta$  (ppm) 196.63, 162.11, 160.47, 144.79, 135.28, 130.13, 122.82, 60.64, 43.88, 26.60.

HR-MS (EI)  $m/z$  calcd for  $[\text{M}^+]$ : 235.08391, found: 235.08392.

These data are consistent with the literature.<sup>2</sup>

### 2-(*N*-(4-formylphenyl)formamido)ethyl formate (**7b**)

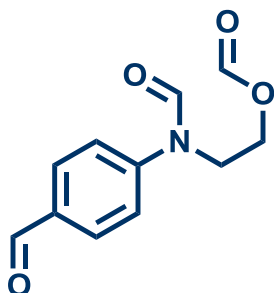

According to **GP-C**, the product **7b** was obtained as a yellow oil (111 mg, 0.50 mmol, >99%).

$^1\text{H}$  NMR (300 MHz,  $\text{CDCl}_3$ ):  $\delta$  (ppm) 10.01 (s, 1H), 8.58 (s, 1H), 7.97 – 7.94 (m, 3H), 7.40 – 7.36 (m, 2H), 4.39 (t,  $J$  = 5.5 Hz, 2H), 4.19 – 4.16 (t, 2H).

$^{13}\text{C}\{^1\text{H}\}$  NMR (75 MHz,  $\text{CDCl}_3$ ):  $\delta$  (ppm) 190.78, 162.17, 160.57, 146.10, 134.57, 131.53, 123.17, 60.76, 44.07.

HR-MS (EI)  $m/z$  calcd for  $[\text{M}^+]$ : 221.06826, found: 221.06831.

These data are consistent with the literature.<sup>2</sup>

### Ethyl 2-(*N*-(2-(formyloxy)ethyl)formamido)benzoate (**8b**)

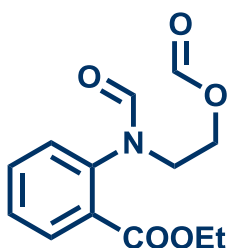

According to **GP-D**, the product **8b** was obtained as a yellow oil (119 mg, 0.45 mmol, 90%).

$^1\text{H}$  NMR (400 MHz,  $\text{CDCl}_3$ ):  $\delta$  (ppm) 8.13 (s, 1H), 8.02 (ddd,  $J$  = 7.8, 1.6, 0.4 Hz, 1H), 7.93 (t,  $J$  = 0.7 Hz, 1H), 7.60 (ddd,  $J$  = 7.5, 1.7 Hz, 1H), 7.47 (td,  $J$  = 7.7, 1.3 Hz, 1H), 7.31 (ddd,  $J$  = 7.9, 1.3, 0.4 Hz, 1H), 4.39 – 4.24 (m, 4H), 4.00 (t,  $J$  = 5.6 Hz, 2H), 1.36 (t,  $J$  = 7.2 Hz, 3H).

$^{13}\text{C}\{^1\text{H}\}$  NMR (101 MHz,  $\text{CDCl}_3$ ):  $\delta$  (ppm) 165.59, 162.99, 160.68, 140.47, 133.43, 132.21, 129.94, 129.29, 128.69, 61.95, 61.28, 45.69, 14.28.

GC-MS (EI) (70 eV):  $m/z$  (%) = 265 ( $\text{M}^+$ ).

These data are consistent with the literature.<sup>2</sup>

**2-(*N*-(4-chlorophenyl)formamido)ethyl formate (9b)**

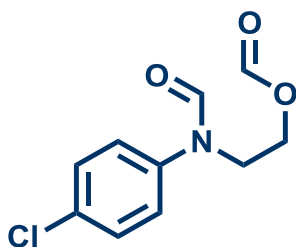

According to **GP-B**, the product **9b** was obtained as a yellow oil (102 mg, 0.45 mmol, 90%).

<sup>1</sup>H NMR (300 MHz, CDCl<sub>3</sub>): δ (ppm) 8.33 (s, 1H), 7.93 (t, *J* = 0.7 Hz, 1H), 7.41 – 7.31 (m, 2H), 7.18 – 7.08 (m, 2H), 4.30 (t, 5.5 Hz, 2H), 4.04 (t, *J* = 5.6 Hz, 2H).

<sup>13</sup>C{<sup>1</sup>H} NMR (75 MHz, CDCl<sub>3</sub>): δ (ppm) 162.32, 160.53, 139.31, 133.04, 129.99, 125.71, 60.62, 44.33.

These data are consistent with the literature.<sup>2</sup>

**2-(*N*-(4-bromophenyl)formamido)ethyl formate (10b)**

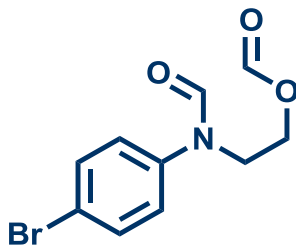

According to **GP-B**, the product **10b** was obtained as a yellow oil (114 mg, 0.42 mmol, 84%).

<sup>1</sup>H NMR (300 MHz, CDCl<sub>3</sub>): δ (ppm) 8.33 (s, 1H), 7.93 (dd, *J* = 1.1, 0.6 Hz, 1H), 7.57 – 7.46 (m, 2H), 7.12 – 7.01 (m, 2H), 4.30 (t, *J* = 5.5 Hz, 2H), 4.04 (t, *J* = 5.6 Hz, 2H).

<sup>13</sup>C{<sup>1</sup>H} NMR (75 MHz, CDCl<sub>3</sub>): δ (ppm) 162.24, 160.52, 139.83, 132.97, 125.93, 120.82, 60.62, 44.27.

These data are consistent with the literature.<sup>2</sup>

### 2-(*N*-(3-chlorophenyl)formamido)ethyl formate (**11b**)

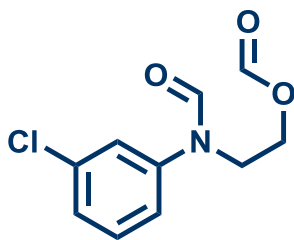

According to **GP-C**, the product **11b** was obtained as a yellow oil (80 mg, 0.35 mmol, 70%).

$^1\text{H}$  NMR (300 MHz,  $\text{CDCl}_3$ ):  $\delta$  (ppm) 8.40 (s, 1H), 7.97 (p,  $J = 0.7$  Hz, 1H), 7.36 (m,  $J = 8.1$ , 7.7, 0.5 Hz, 1H), 7.30 (ddd,  $J = 8.1$ , 1.9, 1.3 Hz, 1H), 7.23 (td,  $J = 2.0$ , 0.5 Hz, 1H), 7.10 (ddd,  $J = 7.7$ , 2.2, 1.3 Hz, 1H), 4.34 (t,  $J = 5.5$  Hz, 2H), 4.08 (t,  $J = 5.6$  Hz, 2H).

$^{13}\text{C}\{^1\text{H}\}$  NMR (75 MHz,  $\text{CDCl}_3$ ):  $\delta$  (ppm) 162.39, 160.60, 142.07, 135.59, 130.94, 127.56, 124.55, 122.44, 60.72, 44.41.

These data are consistent with the literature.<sup>2</sup>

### 2-(*N*-(3-(4,4,5,5-tetramethyl-1,3,2-dioxaborolan-2-yl)phenyl)formamido)ethyl formate (**12b**)

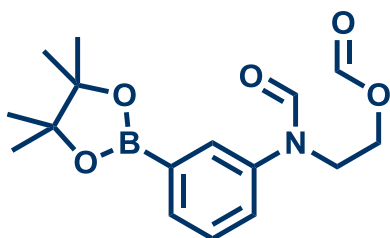

According to **GP-B**, the product **12b** was obtained as a yellow oil (89 mg, 0.28 mmol, 56%).

$^1\text{H}$  NMR (300 MHz,  $\text{CDCl}_3$ ):  $\delta$  (ppm) 8.39 (s, 1H), 7.97 (t,  $J = 0.7$  Hz, 1H), 7.75 (dt,  $J = 7.3$ , 1.1 Hz, 1H), 7.61 (ddd,  $J = 2.4$ , 1.1, 0.5 Hz, 1H), 7.43 (ddd,  $J = 7.9$ , 7.3, 0.6 Hz, 1H), 7.30 (dd,  $J = 2.4$ , 1.2 Hz, 1H), 4.32 (t,  $J = 5.6$  Hz, 2H), 4.12 (t,  $J = 5.3$  Hz, 2H), 1.35 (s, 12H).

$^{13}\text{C}\{^1\text{H}\}$  NMR (75 MHz,  $\text{CDCl}_3$ ):  $\delta$  (ppm) 24.87, 44.08, 60.66, 84.27, 127.34, 129.26, 130.50, 133.66, 140.09, 160.59, 162.75.

These data are consistent with the literature.<sup>2</sup>

### 2-(*N*-(3-cyanophenyl)formamido)ethyl formate (**13b**)

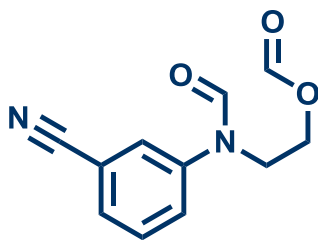

According to **GP-C**, the product **13b** was obtained as a yellow oil (88 mg, 0.41 mmol, 81%).

$^1\text{H}$  NMR (300 MHz,  $\text{CDCl}_3$ ):  $\delta$  (ppm) 8.43 (s, 1H), 7.97 (t,  $J$  = 0.7 Hz, 1H), 7.67 – 7.51 (m, 3H), 7.47 (ddd,  $J$  = 7.7, 2.3, 1.5 Hz, 1H), 4.37 (t,  $J$  = 5.4 Hz, 1H), 4.11 (t,  $J$  = 5.5 Hz, 1H).

$^{13}\text{C}\{^1\text{H}\}$  NMR (75 MHz,  $\text{CDCl}_3$ ):  $\delta$  (ppm) 162.03, 160.50, 141.94, 131.04, 130.71, 128.39, 127.29, 117.72, 114.31, 60.75, 44.59

These data are consistent with the literature.<sup>2</sup>

### 2-(*N*-(6-methoxynaphthalen-2-yl)formamido)ethyl formate (**14b**)

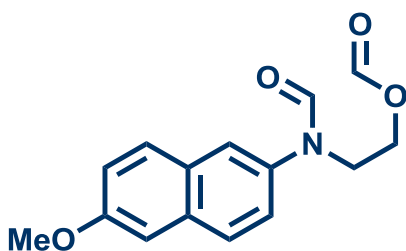

According to **GP-C**, the product **14b** was obtained as a yellow oil (82 mg, 0.30 mmol, 60%).

$^1\text{H}$  NMR (400 MHz, Chloroform- $d$ )  $\delta$  8.46 (s, 1H), 7.97 (t,  $J$  = 0.7 Hz, 1H), 7.79 (d,  $J$  = 8.8 Hz, 1H), 7.73 (d,  $J$  = 9.2 Hz, 1H), 7.56 (d,  $J$  = 2.2 Hz, 1H), 7.29 (dd,  $J$  = 8.7, 2.3 Hz, 1H), 7.22 (dd,  $J$  = 9.0, 2.5 Hz, 1H), 7.15 (d,  $J$  = 2.6 Hz, 1H), 4.37 (t,  $J$  = 5.7 Hz, 2H), 4.17 (t,  $J$  = 5.6 Hz, 2H), 3.94 (s, 3H).

$^{13}\text{C}\{^1\text{H}\}$  NMR (101 MHz,  $\text{CDCl}_3$ )  $\delta$  163.05, 160.74, 158.37, 136.02, 133.58, 129.33, 129.00, 128.78, 123.55, 123.22, 120.28, 105.82, 60.85, 55.55, 44.44.

These data are consistent with the literature.<sup>2</sup>

### 2-(*N*-(dibenzo[*b,d*]furan-2-yl)formamido)ethyl formate (**15b**)

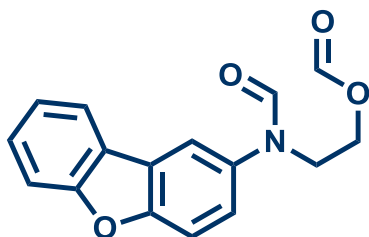

According to **GP-C** (using 1 equiv. of pyridine) the product **15b** was obtained as a yellow oil (38 mg, 0.135 mmol, 27%).

$^1\text{H}$  NMR (300 MHz,  $\text{CDCl}_3$ )  $\delta$  (ppm) 8.45 (s, 1H), 7.96 – 7.89 (m, 1H), 7.83 – 7.80 (m, 1H), 7.60 – 7.45 (m, 3H), 7.40 – 7.27 (m, 2H), 4.03 (t,  $J$  = 5.3 Hz, 2H), 3.84 (t,  $J$  = 5.3 Hz, 2H).

$^{13}\text{C}\{^1\text{H}\}$  NMR (75 MHz,  $\text{CDCl}_3$ )  $\delta$  (ppm) 164.16, 157.04, 154.96, 136.34, 128.14, 125.45, 124.68, 123.56, 123.23, 121.00, 118.01, 112.67, 112.02, 60.59, 49.87.

These data are consistent with the literature.<sup>2</sup>

### 2-(*N*-(dibenzo[*b,d*]furan-2-yl)formamido)ethyl formate (**16b**)

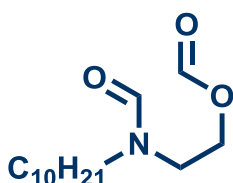

According to **GP-D** (using 1 equiv. of pyridine) the product **16b** was obtained as a yellow oil (22 mg, 0.085 mmol, 17%).

$^1\text{H}$  NMR (300 MHz,  $\text{CDCl}_3$ )  $\delta$  (ppm) 8.07 (s, 1H), 8.04 (p,  $J$  = 0.8 Hz, 1H), 4.35 – 4.21 (m, 2H), 3.58 (t,  $J$  = 5.7 Hz, 1H), 3.49 (t,  $J$  = 5.4 Hz, 1H), 3.37 – 3.21 (m, 2H), 1.53 (h,  $J$  = 7.0 Hz, 2H), 1.32 – 1.20 (m, 14H), 0.93 – 0.78 (m, 3H).

$^{13}\text{C}\{^1\text{H}\}$  NMR (75 MHz,  $\text{CDCl}_3$ )  $\delta$  163.30, 163.09, 160.76, 160.51, 77.58, 77.16, 76.74, 61.20, 60.72, 48.45, 45.99, 42.68, 41.32, 32.00, 31.98, 29.66, 29.64, 29.61, 29.44, 29.41, 29.39, 29.29, 28.86, 27.47, 26.99, 26.53, 22.79, 14.23.

These data are consistent with the literature.<sup>2</sup>



**(S)-2-(N-(4-(5-(acetamidomethyl)-2-oxooxazolidin-3-yl)-2-fluorophenyl)formamido)ethyl formate (17b)**

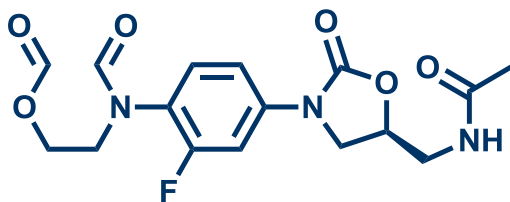

Synthesized according to **GP-C**. The product was purified via flash column chromatography (RediSep® Rf+ automatic column) using DCM/methanol. Solvent was removed *in vacuo* to yield **17b** as a yellow oil (150 mg, 0.41 mmol, 82%).

$^1\text{H}$  NMR (300 MHz, DMSO- $d_6$ ):  $\delta$  (ppm) 8.37 – 8.08 (m, 3H), 7.74 – 7.27 (m, 3H), 4.75 (m,  $J$  = 7.2 Hz, 1H), 4.20 – 4.04 (m, 2H), 3.94 (t,  $J$  = 5.3 Hz, 1H), 3.81 – 3.59 (m, 2H), 3.53 – 3.36 (m, 3H), 1.83 (s, 3H).

$^{13}\text{C}\{^1\text{H}\}$  NMR (75 MHz, DMSO-  $d_6$ ):  $\delta$  (ppm) 170.52, 163.61, 163.58, 163.40, 162.27, 162.24, 159.33, 156.35, 156.07, 154.45, 139.79, 139.74, 139.65, 139.60, 130.33, 129.92, 129.90, 123.25, 123.09, 121.24, 121.06, 114.56, 114.52, 114.37, 114.33, 106.60, 106.42, 106.25, 106.08, 72.24, 72.20, 61.04, 60.79, 48.17, 47.68, 43.94, 41.81, 22.89.

$^{19}\text{F}$  NMR (282 MHz, DMSO-  $d_6$ ):  $\delta$  (ppm) -118.10 (m,  $J$  = 20.4, 12.9, 6.6 Hz), -121.61 (t,  $J$  = 10.9 Hz).

These data are consistent with the literature.<sup>2</sup>

## 8: $^1\text{H}$ NMR, $^{13}\text{C}$ NMR SPECTRA FOR SUBSTRATES

Original spectra for **2a**:

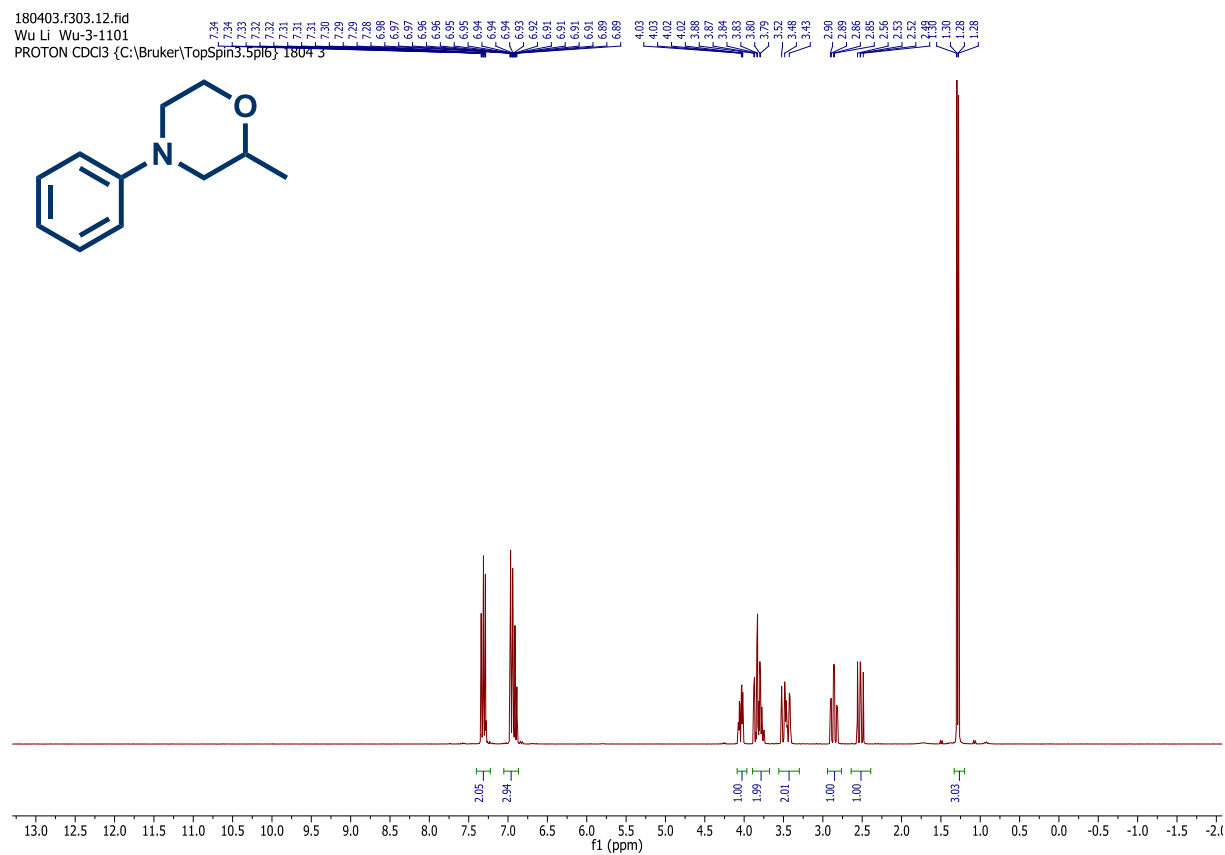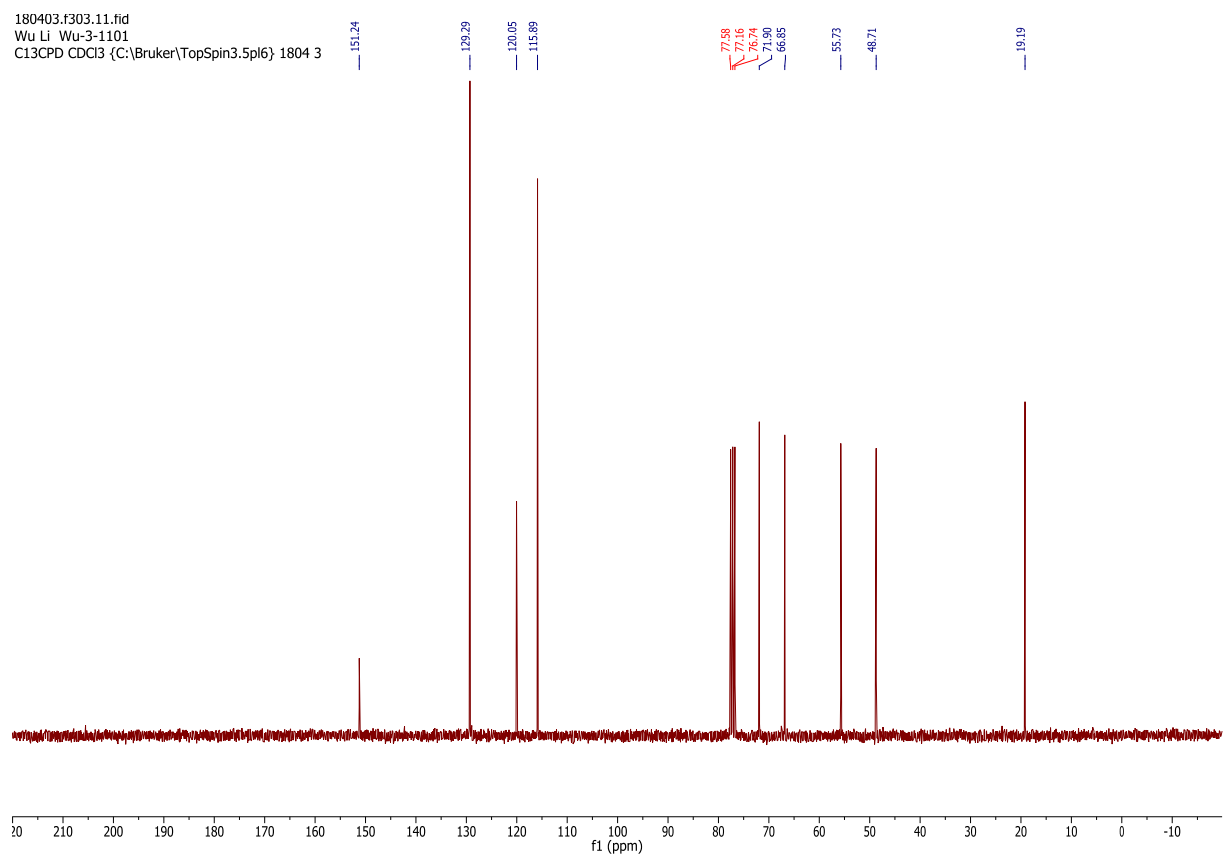

Original spectra for **3a**:

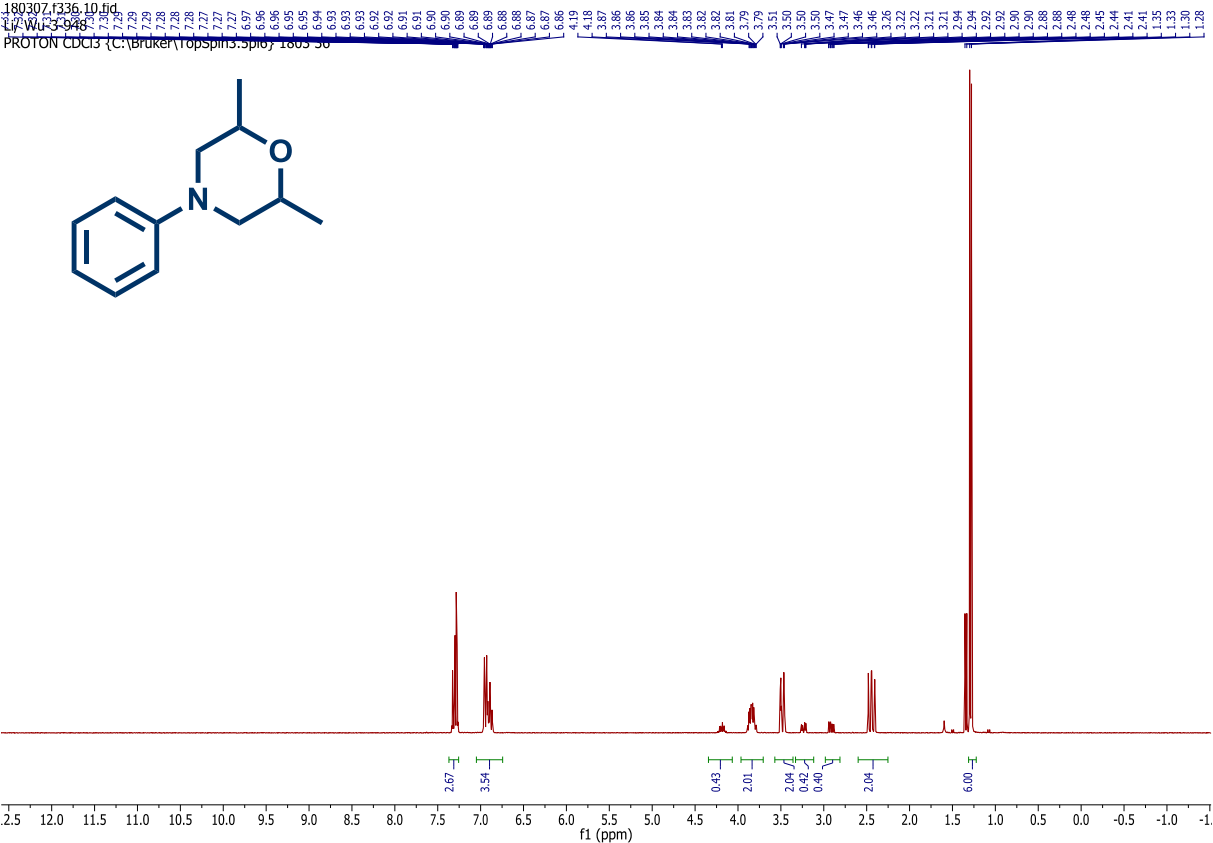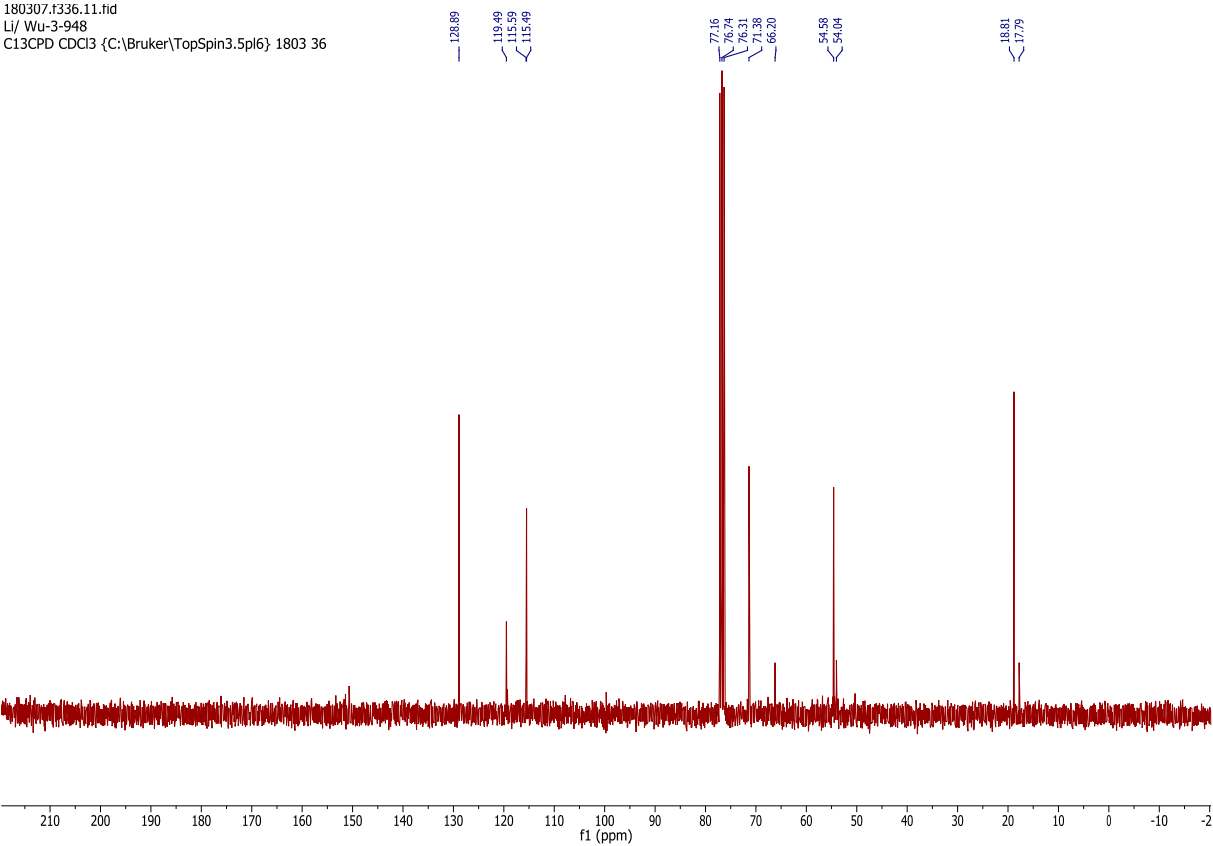

# Original spectra for **11a**:

180208.f332.10.fid

Wu Li Wu-3-852

PROTON CDCl<sub>3</sub> {C:\Bruker\TopSpin3.5pl6} 1802 32

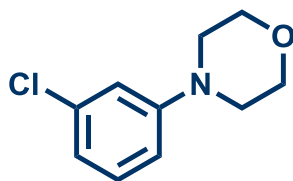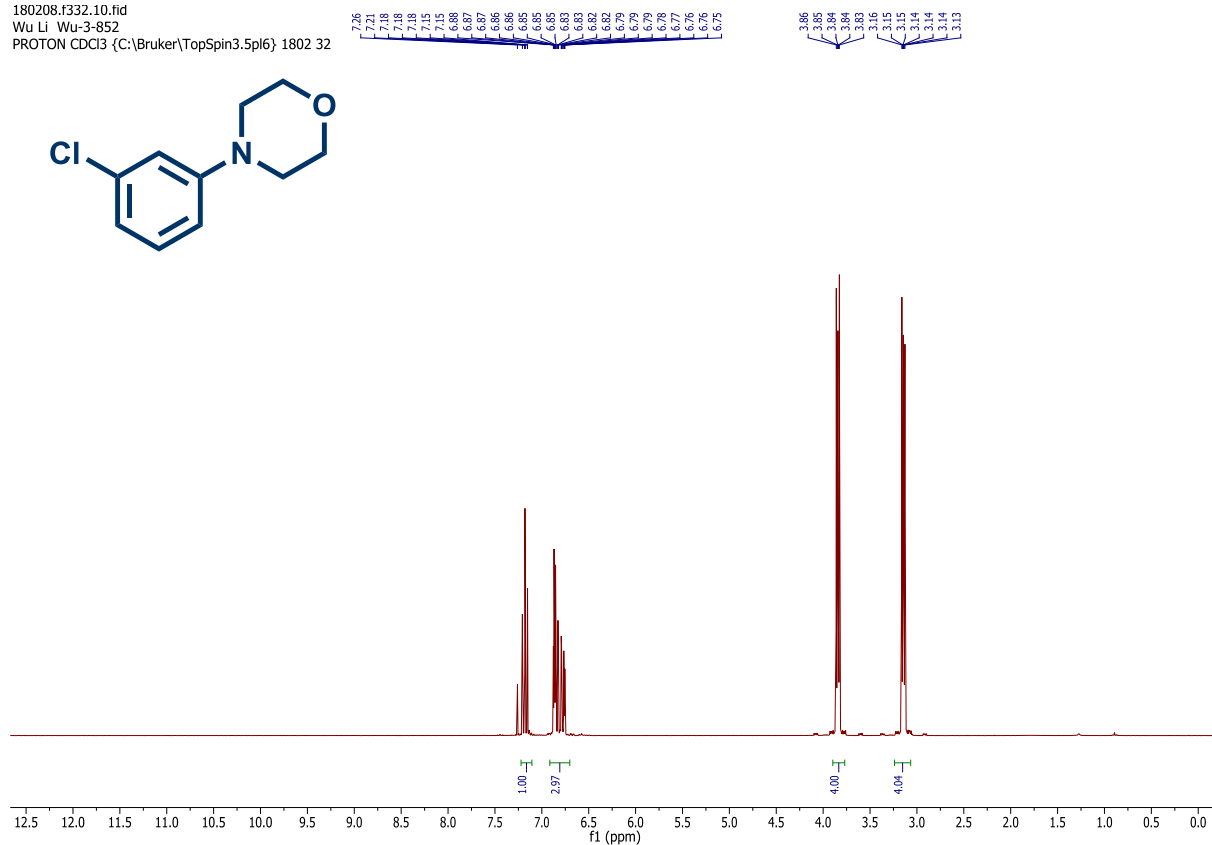

180208.f332.11.fid

Wu Li Wu-3-852

C13CPD CDCl<sub>3</sub> {C:\Bruker\TopSpin3.5pl6} 1802 32

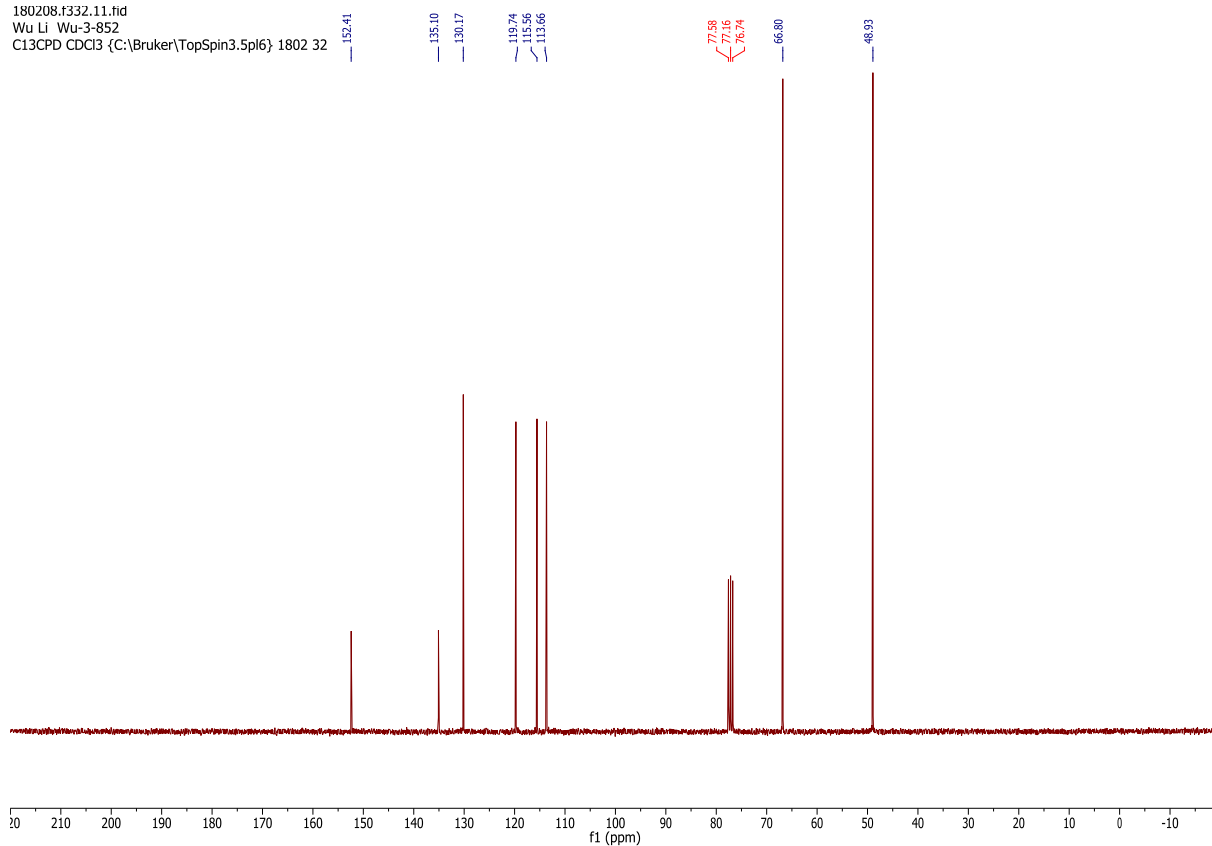

# Original spectra for **13a**:

180131.f338.10.fid  
Wu Li Wu-3-768  
PROTON CDCl<sub>3</sub> {C:\Bruker\TopSpin3.5pl6} 1801 38

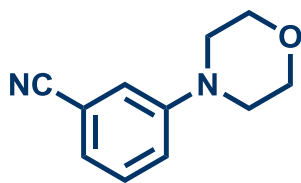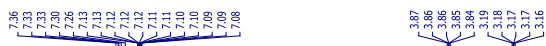

180131.f338.11.fid  
Wu Li Wu-3-768  
C13CPD CDCl<sub>3</sub> {C:\Bruker\TopSpin3.5pl6} 1801 38

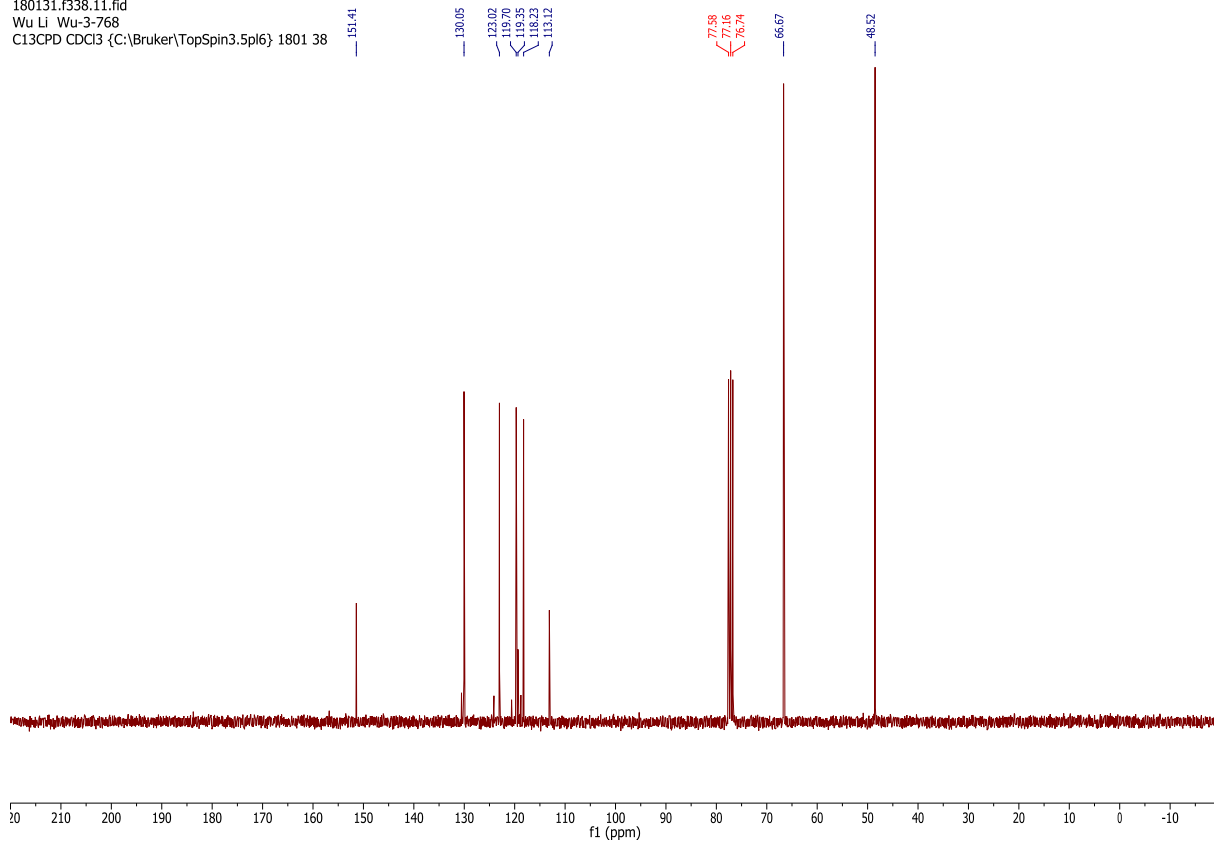

Original spectra for **14a**:

180206.415.10.fid  
Wu Li Wu-3-847  
Au1H CDCl3 {C:\Bruker\TopSpin3.5pl6} 1802 15

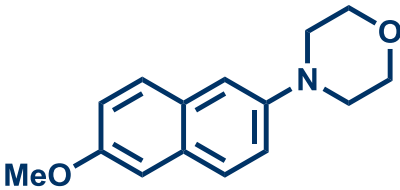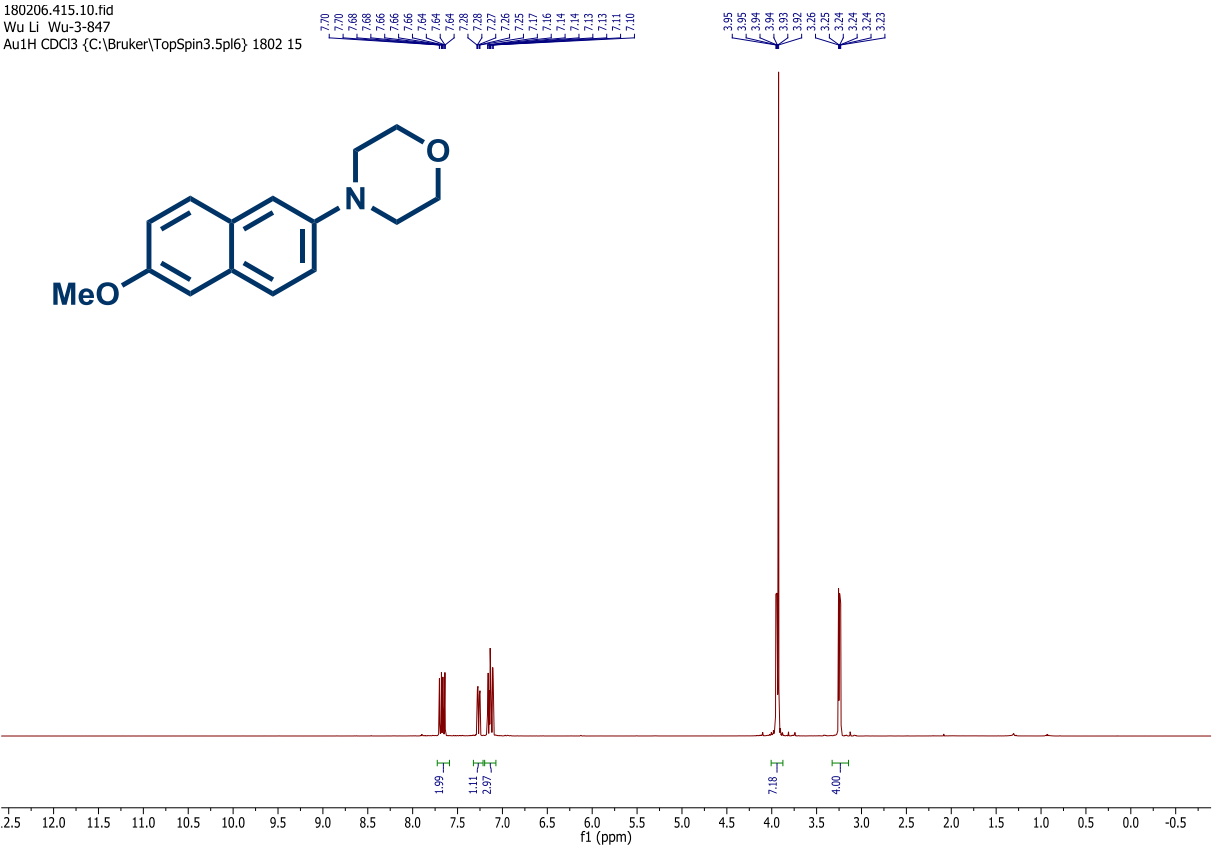

180206.415.11.fid  
Wu Li Wu-3-847  
Au13C CDCl3 {C:\Bruker\TopSpin3.5pl6} 1802 15

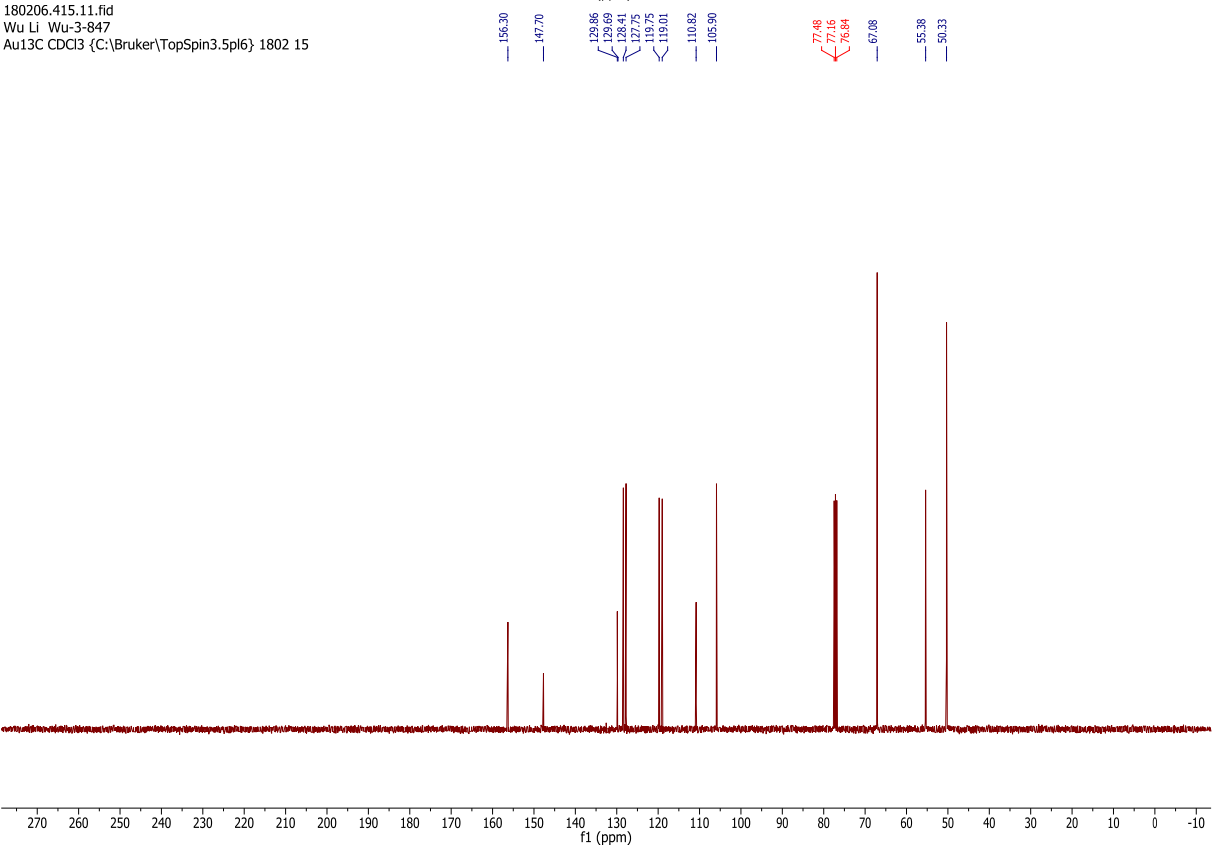

Original spectra for **15a**:

180816.409.10.fid  
Wu Li WU-4-643-1  
Au1H CDCl3 {C:\Bruker\TopSpin3.5pl6} 1808 9

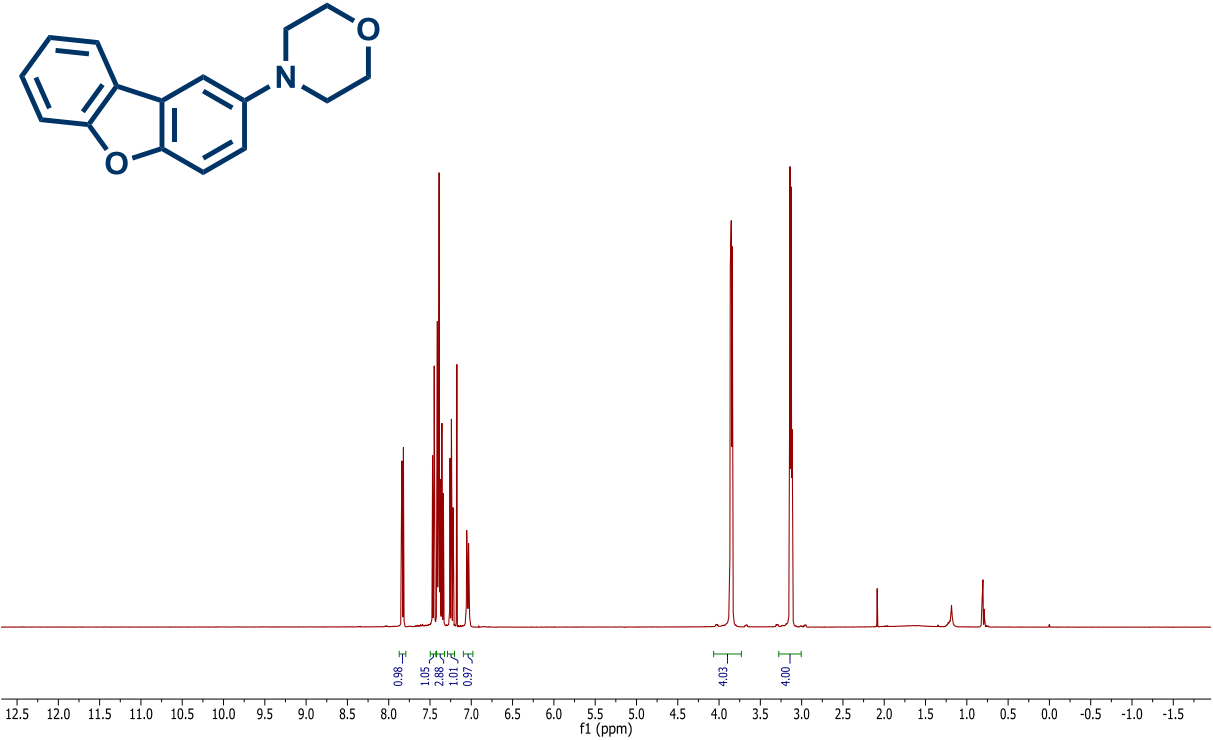

180816.409.11.fid  
Wu Li WU-4-643-1  
Au13C CDCl3 {C:\Bruker\TopSpin3.5pl6} 1808 9

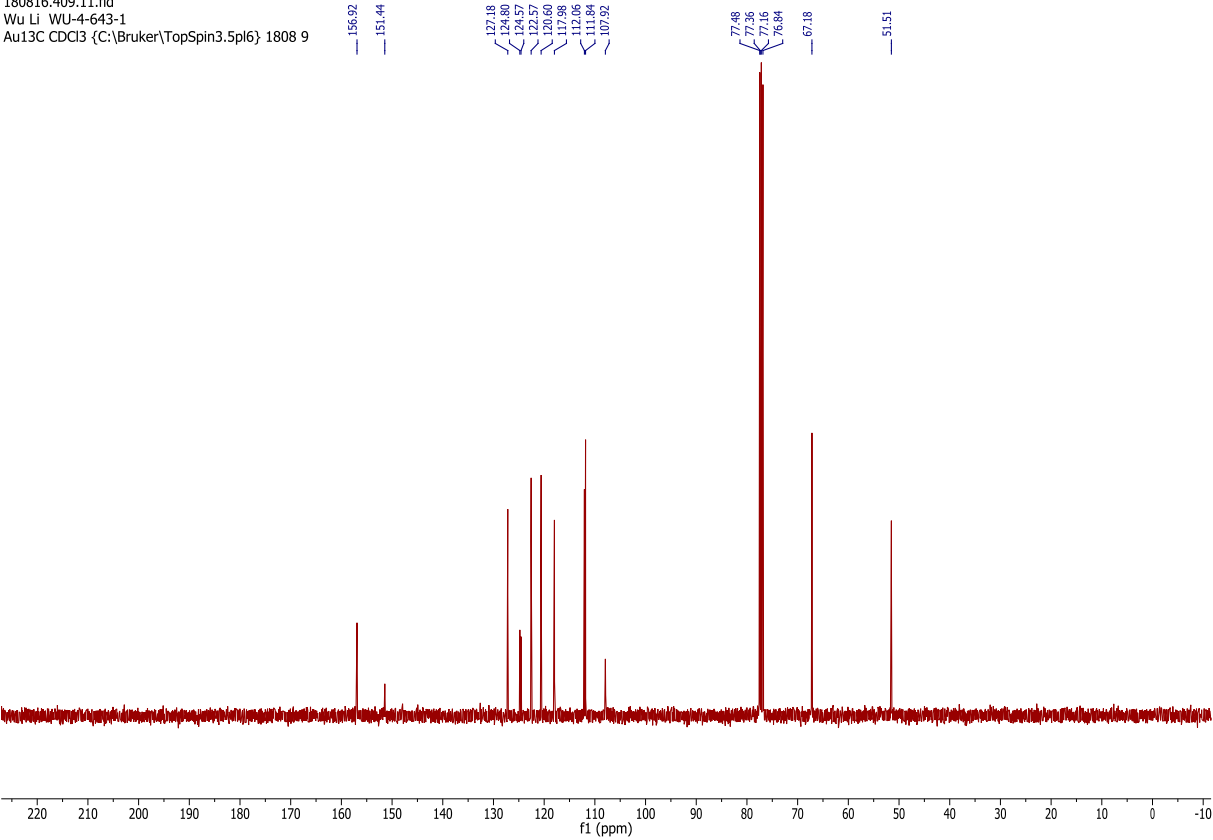

Original spectra for **16a**:

180910.302.10.fid  
David Leonard DKL1-8  
Au1H CDCl3 {C:\Bruker\TopSpin3.5pl6} 1809 2

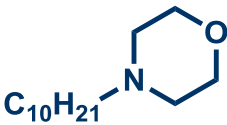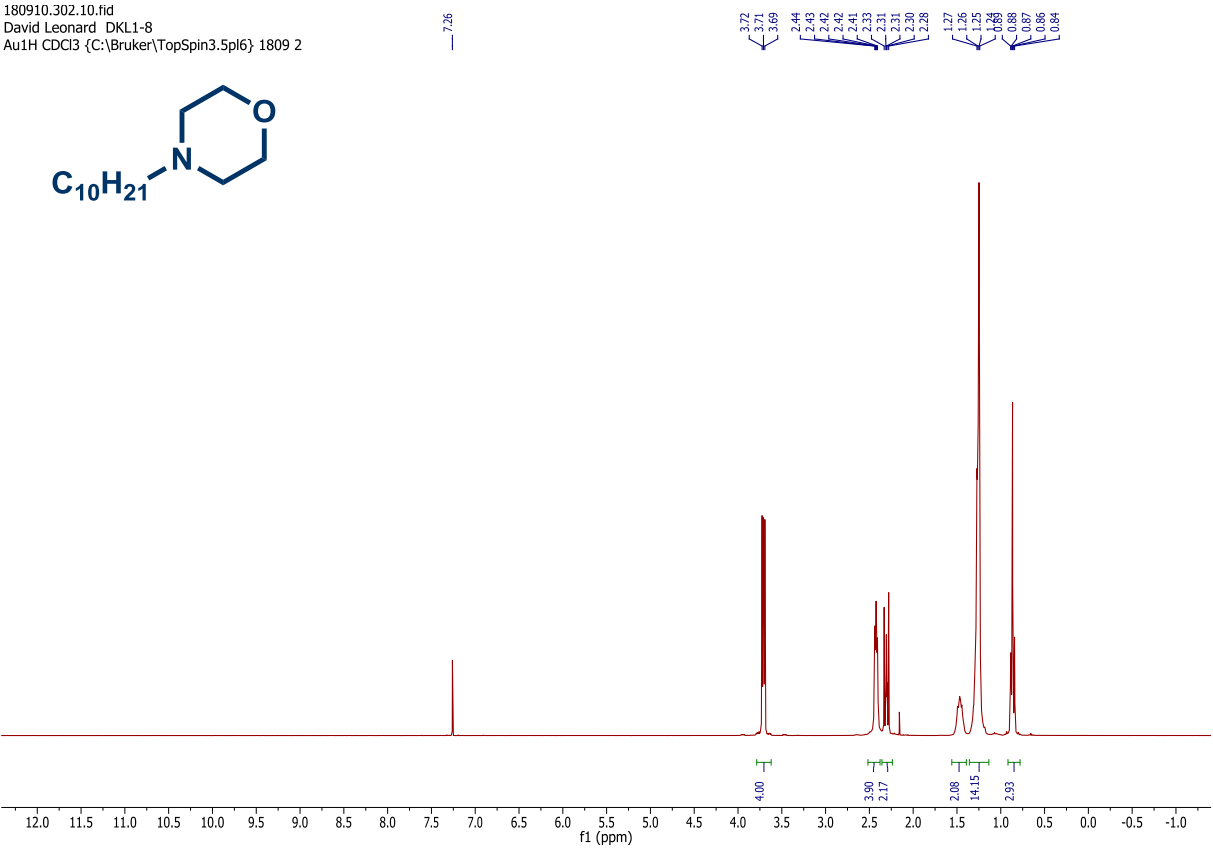

180910.302.11.fid  
David Leonard DKL1-8  
Au13C CDCl3 {C:\Bruker\TopSpin3.5pl6} 1809 2

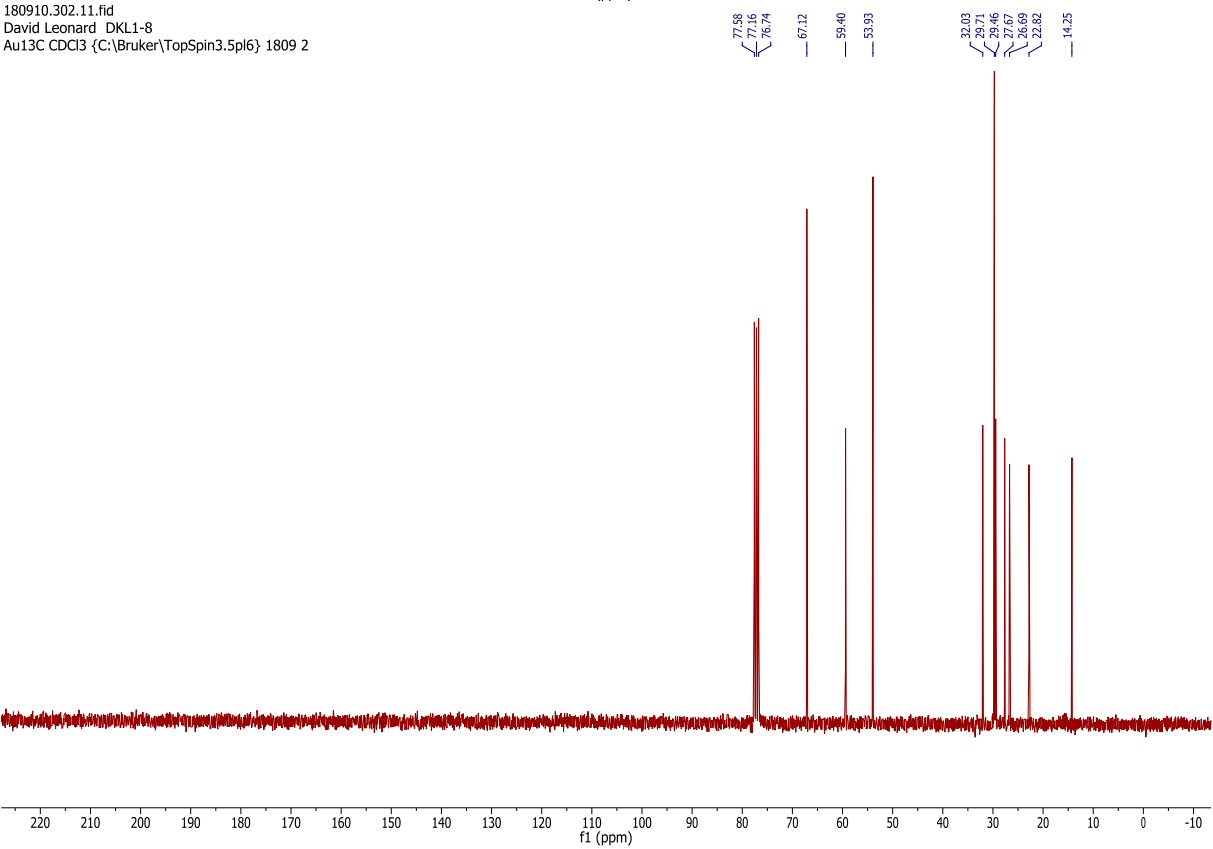



## 9: $^1\text{H}$ NMR, $^{13}\text{C}$ NMR & $^{19}\text{F}$ SPECTRA FOR PRODUCTS

Original spectra for **1b**:

180824.433.10.fid  
Daid Leonard WL-677  
Au1H CD CB {C:\Bruker\TopSpin3.5pl6} 1808 33

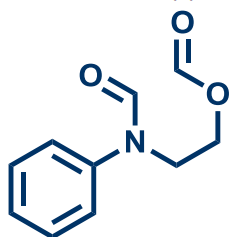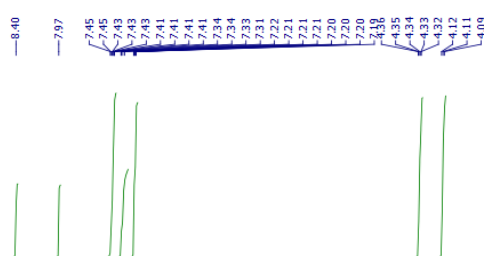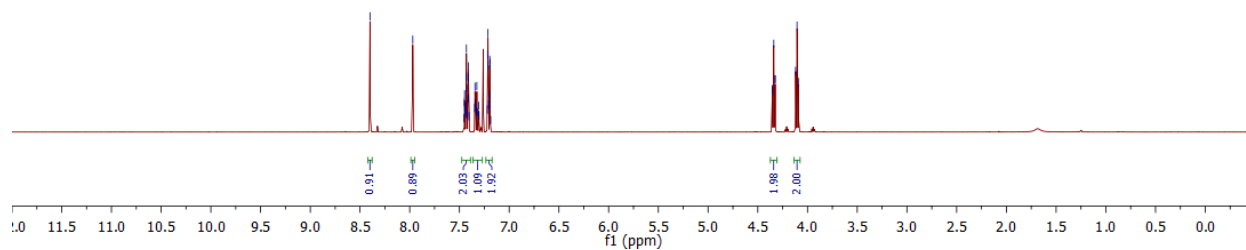

180824.433.11.fid  
Daid Leonard WL-677  
Au13C CD CB {C:\Bruker\TopSpin3.5pl6} 1808 33

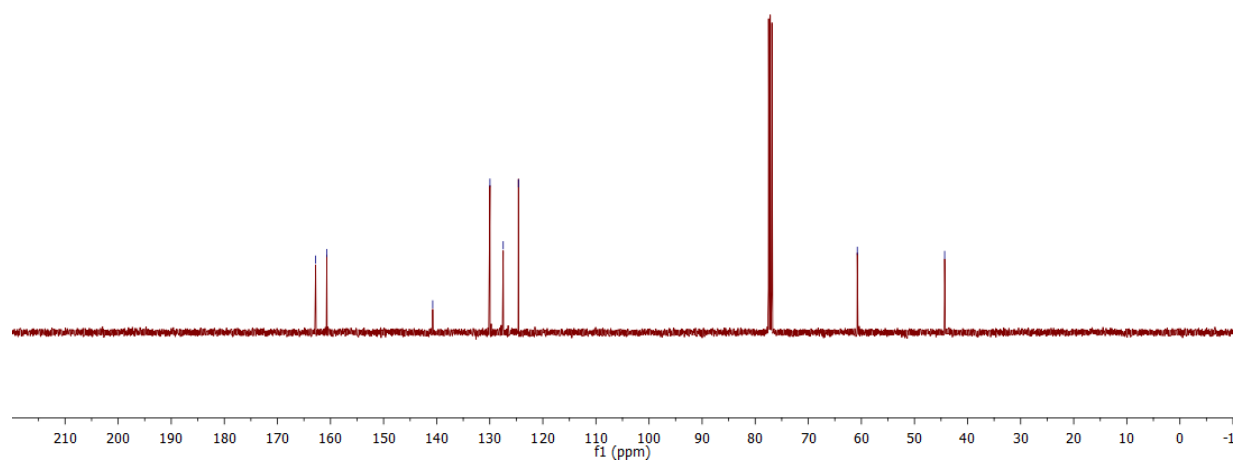

190820-28770-0-0  
David Leonard - W13-1101  
Au1H CD CB (C:Bruker)TopSpin3.5p16: 18087

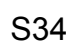

# Original spectra for **3b**:

180830.308.10.fid  
David Leonard WL-3-948  
Au1H CDCl<sub>3</sub> {C:\Bruker\TopSpin3.5pl6} 1808 8

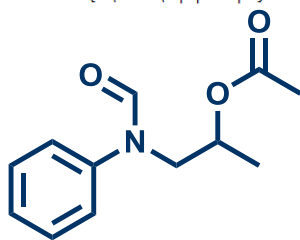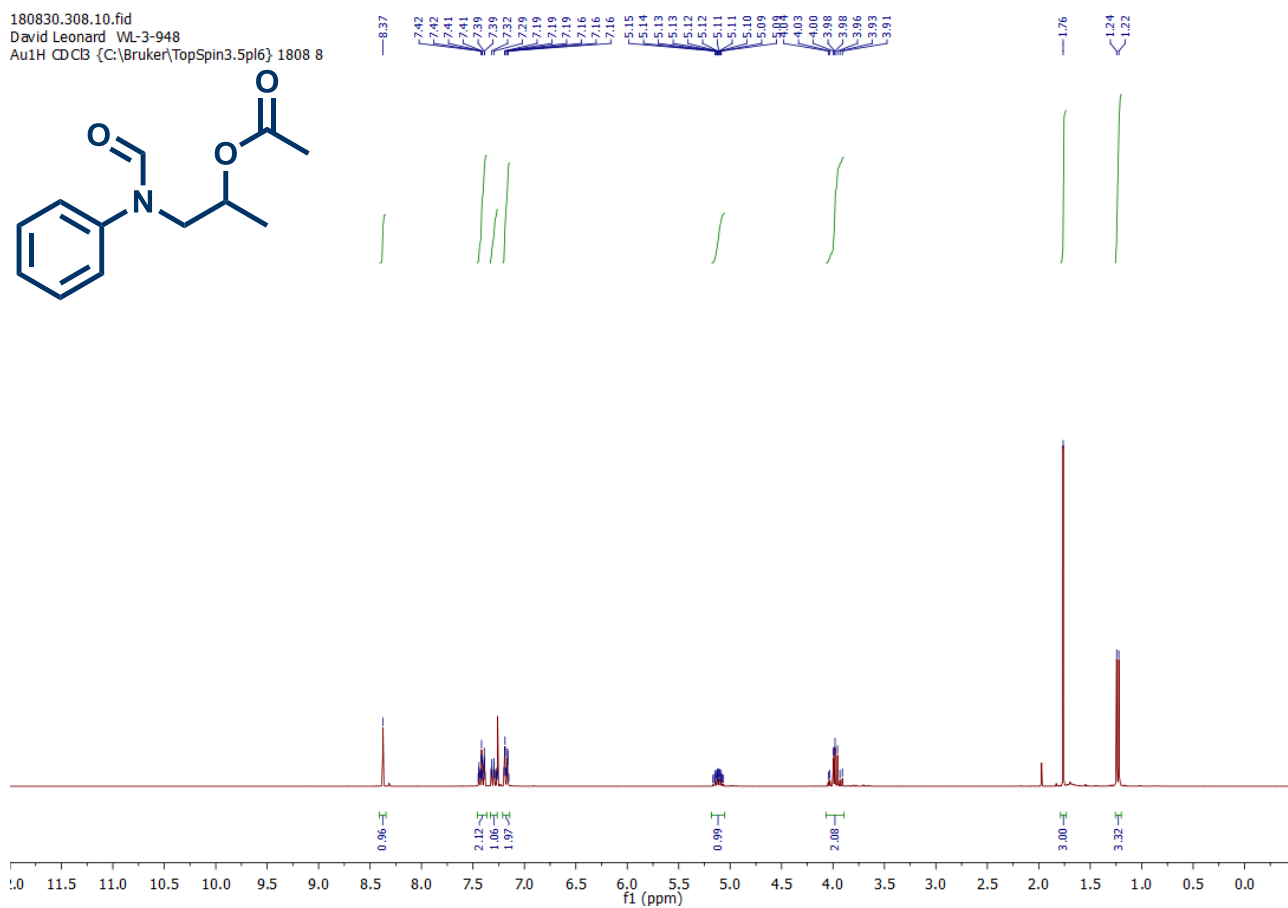

180830.308.11.fid  
David Leonard WL-3-948  
Au13C CDCl<sub>3</sub> {C:\Bruker\TopSpin3.5pl6} 1808 8

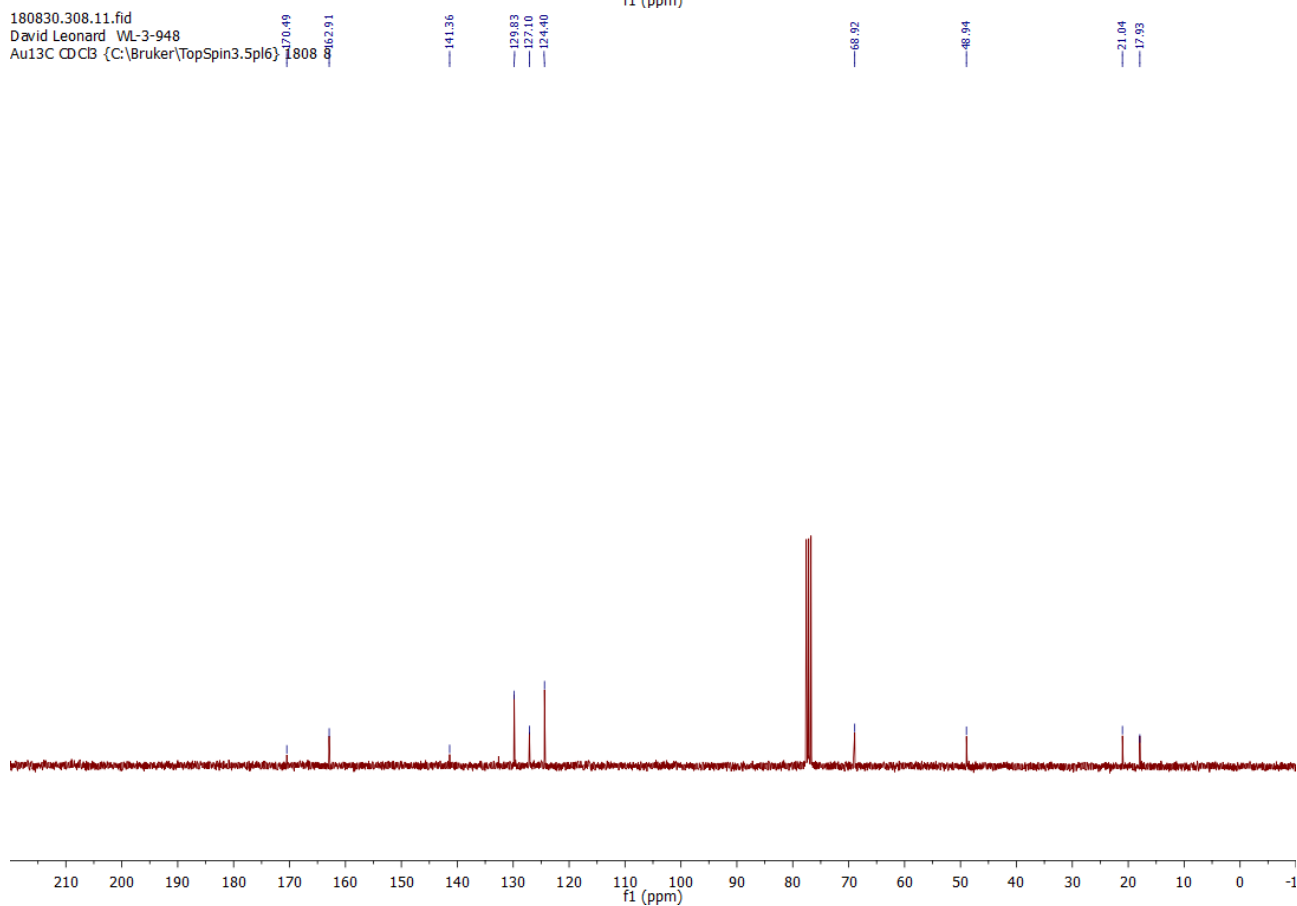

# Original spectra for **4b**:

180515.f314.10.fid  
Wu Li Wu-4-136  
PROTON CDCl<sub>3</sub> {C:\Bruker\TopSpin3.5pl6} 1805 14

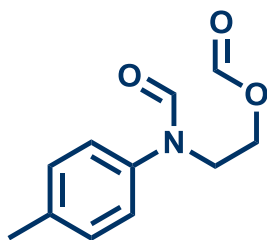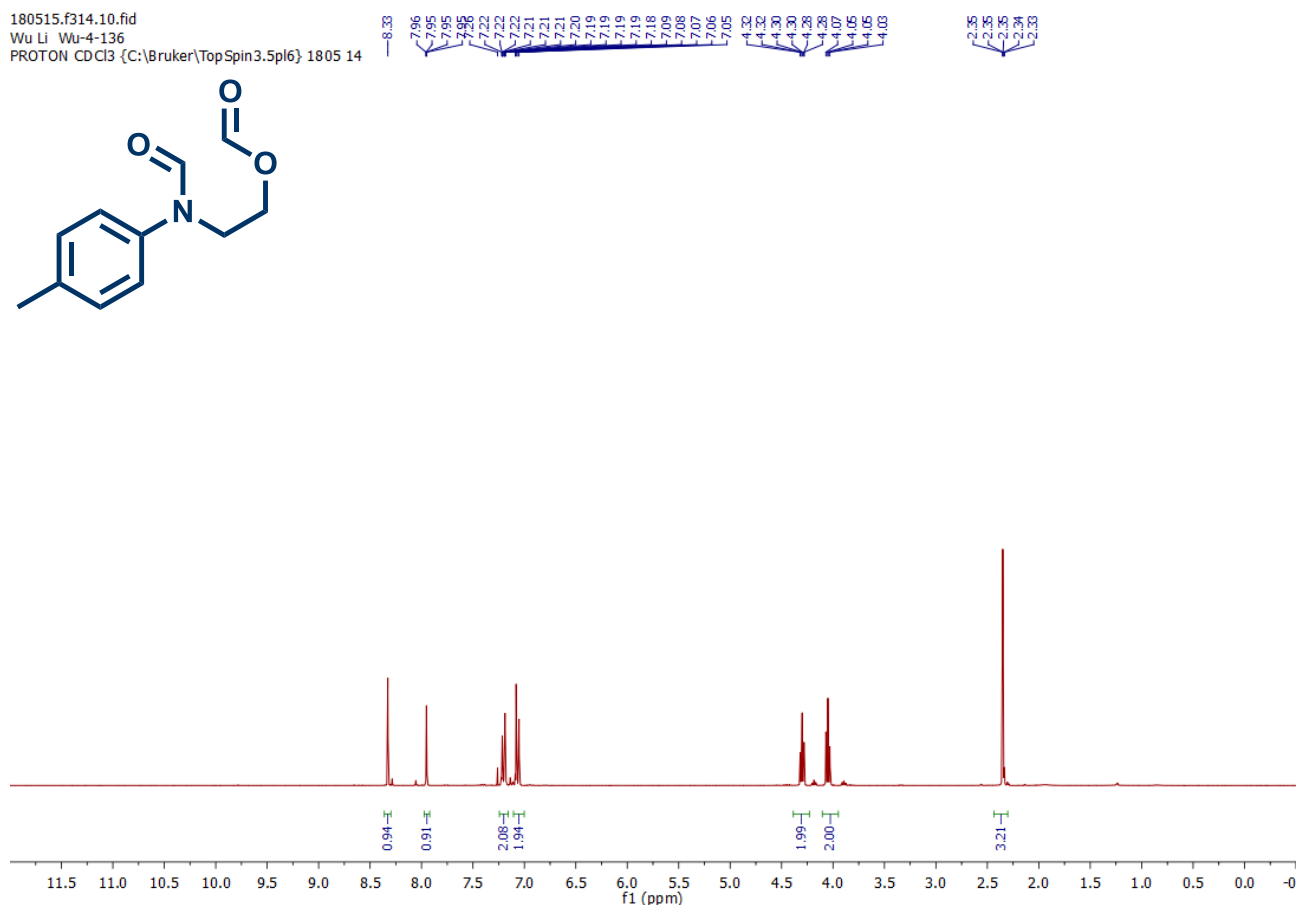

180515.f314.11.fid  
Wu Li Wu-4-136  
C13CPD CDCl<sub>3</sub> {C:\Bruker\TopSpin3.5pl6} 1805 14

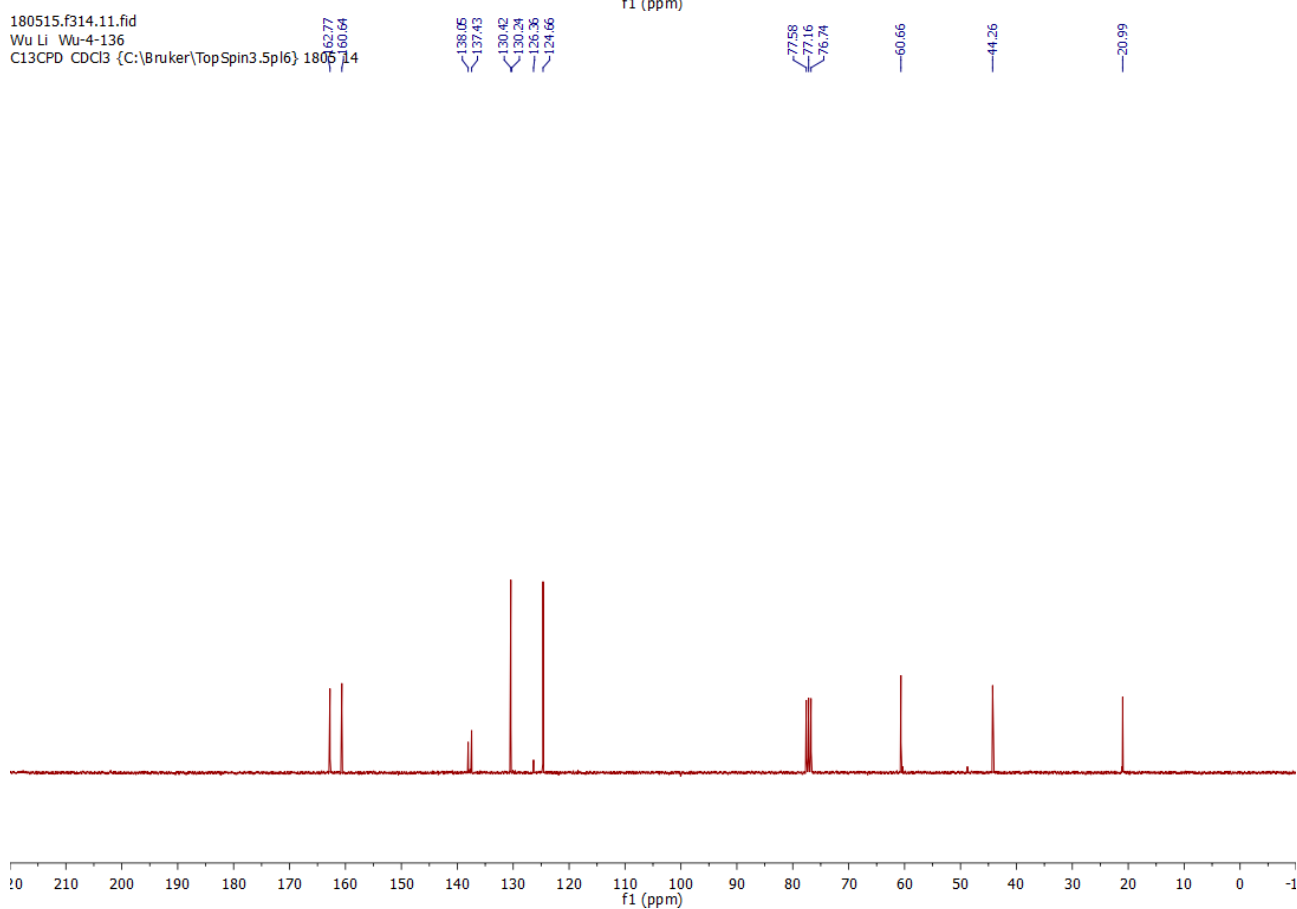

# Original spectra for **5b**:

180906.305.10.fid  
David Leonard DKL 674.1  
Au1H CDCl<sub>3</sub> {C:\Bruker\TopSpin3.5pl6} 1809 5

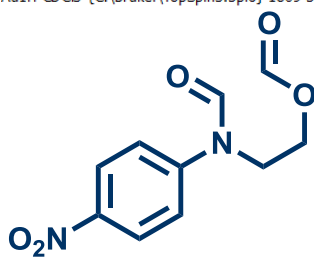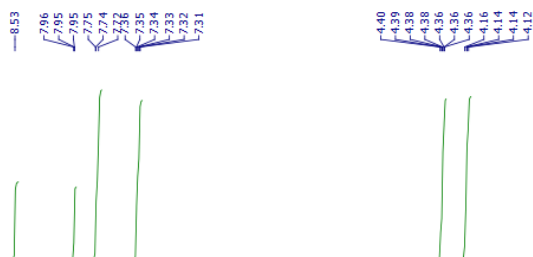

180906.305.11.fid  
David Leonard DKL 674.1  
Au13C CDCl<sub>3</sub> {C:\Bruker\TopSpin3.5pl6} 1809 5

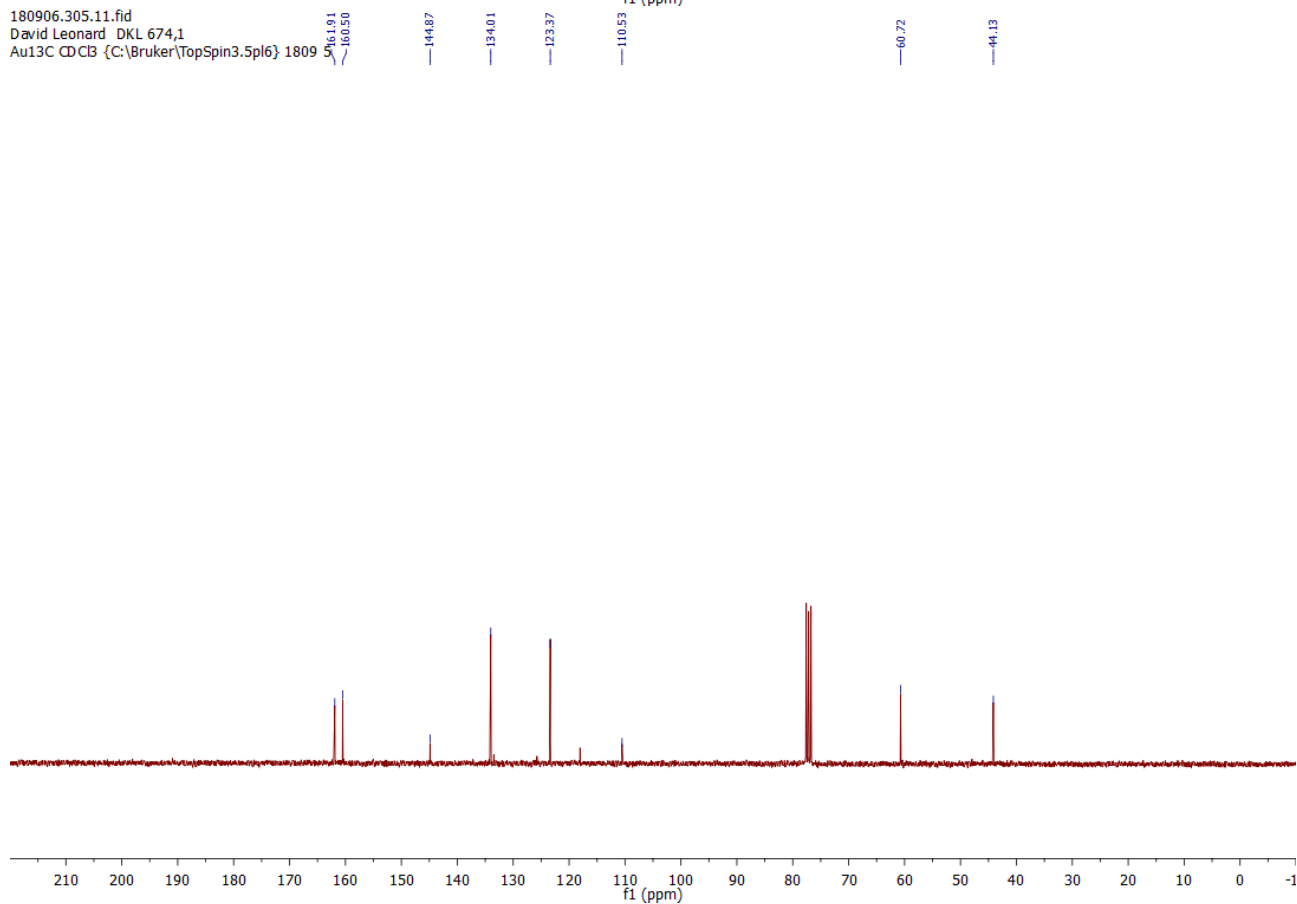

# Original spectra for **6b**:

180906.307.10.fid  
David Leonard DKL 673,1  
Au1H CDCl<sub>3</sub> {C:\Bruker\TopSpin3.5pl6} 1809 7

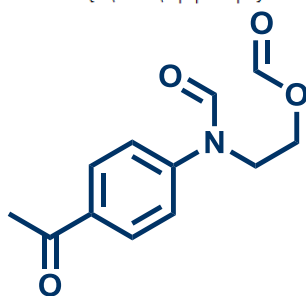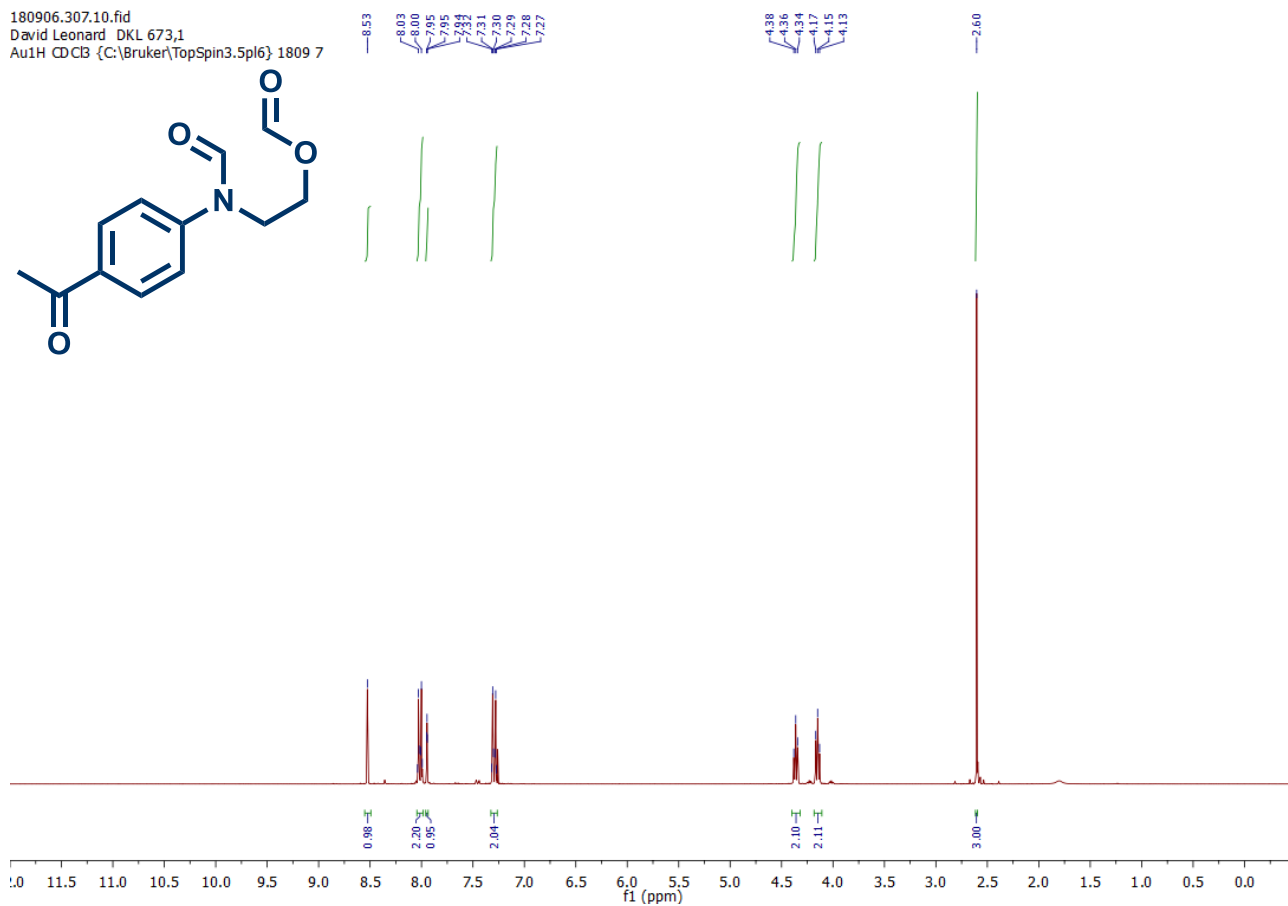

180906.307.11.fid  
David Leonard DKL 673,1  
Au13C CDCl<sub>3</sub> {C:\Bruker\TopSpin3.5pl6} 1809

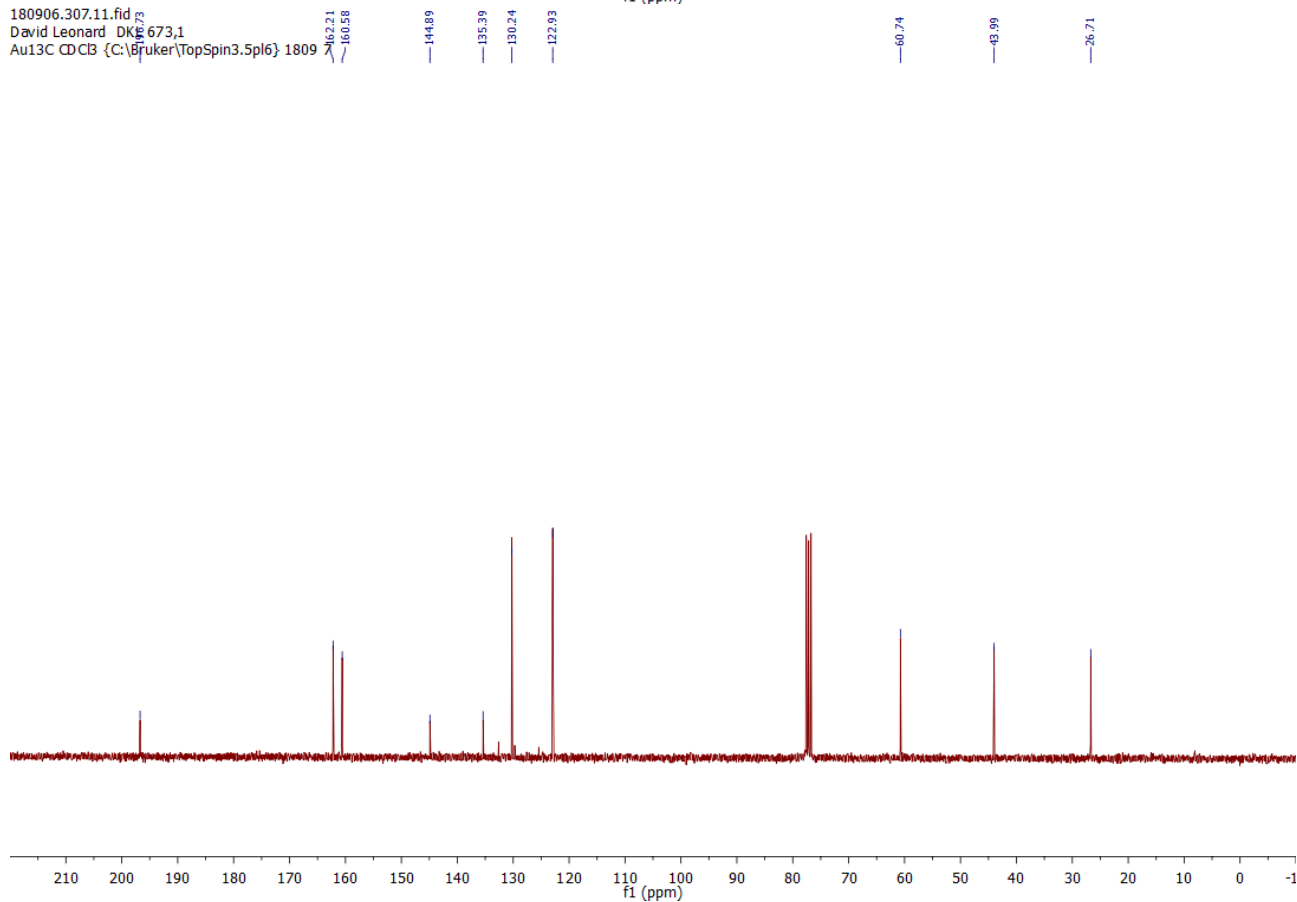

# Original spectra for **7b**:

180906.308.10.fid  
David Leonard DKL 671.1  
Au1H CDCl<sub>3</sub> {C:\Bruker\TopSpin3.5pl6} 1809 8

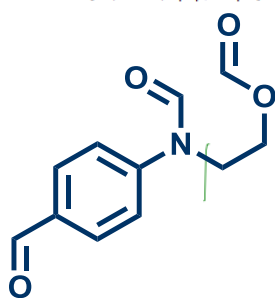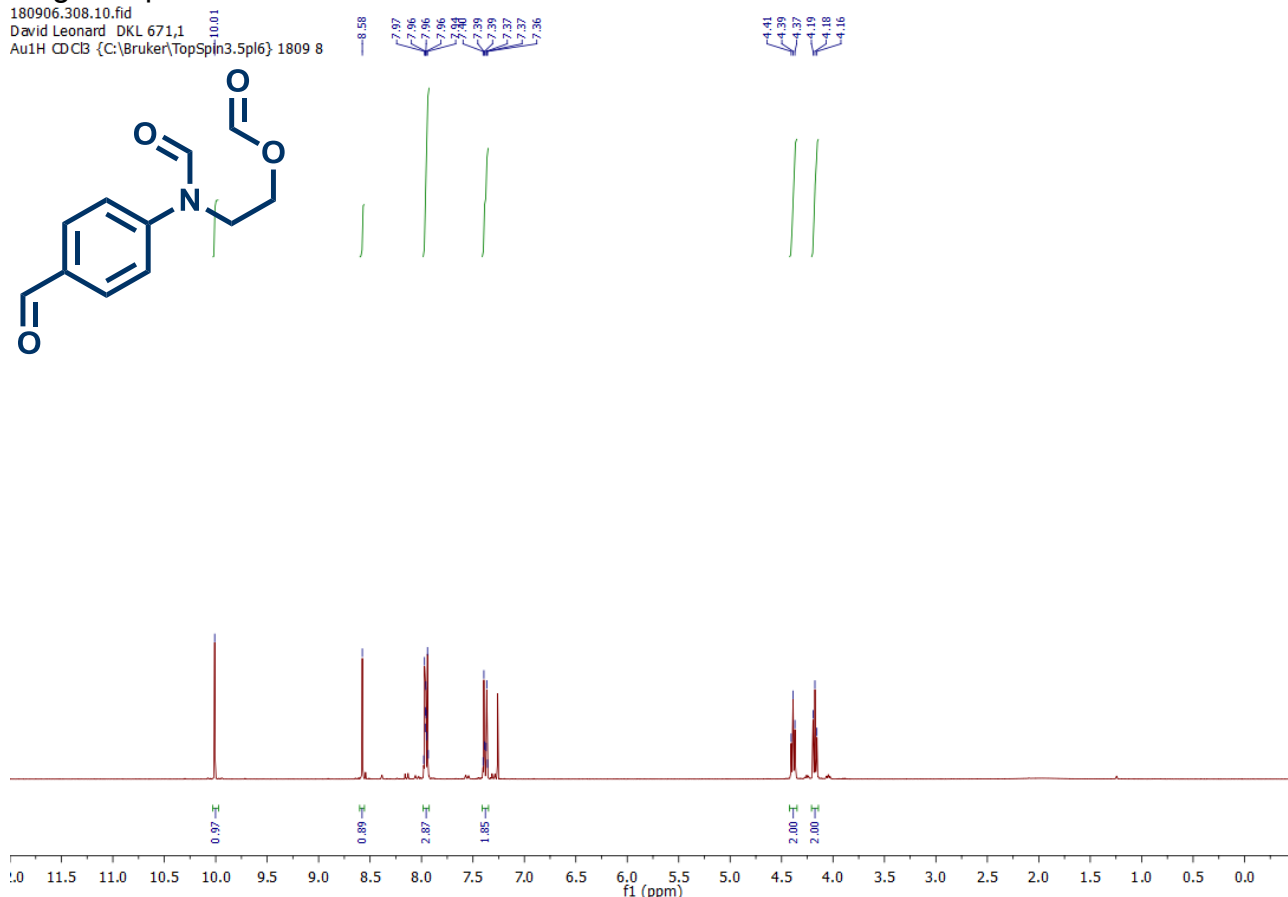

180906.308.11.fid  
David Leonard DKL 671.1  
Au13C CDCl<sub>3</sub> {C:\Bruker\TopSpin3.5pl6} 1809 8

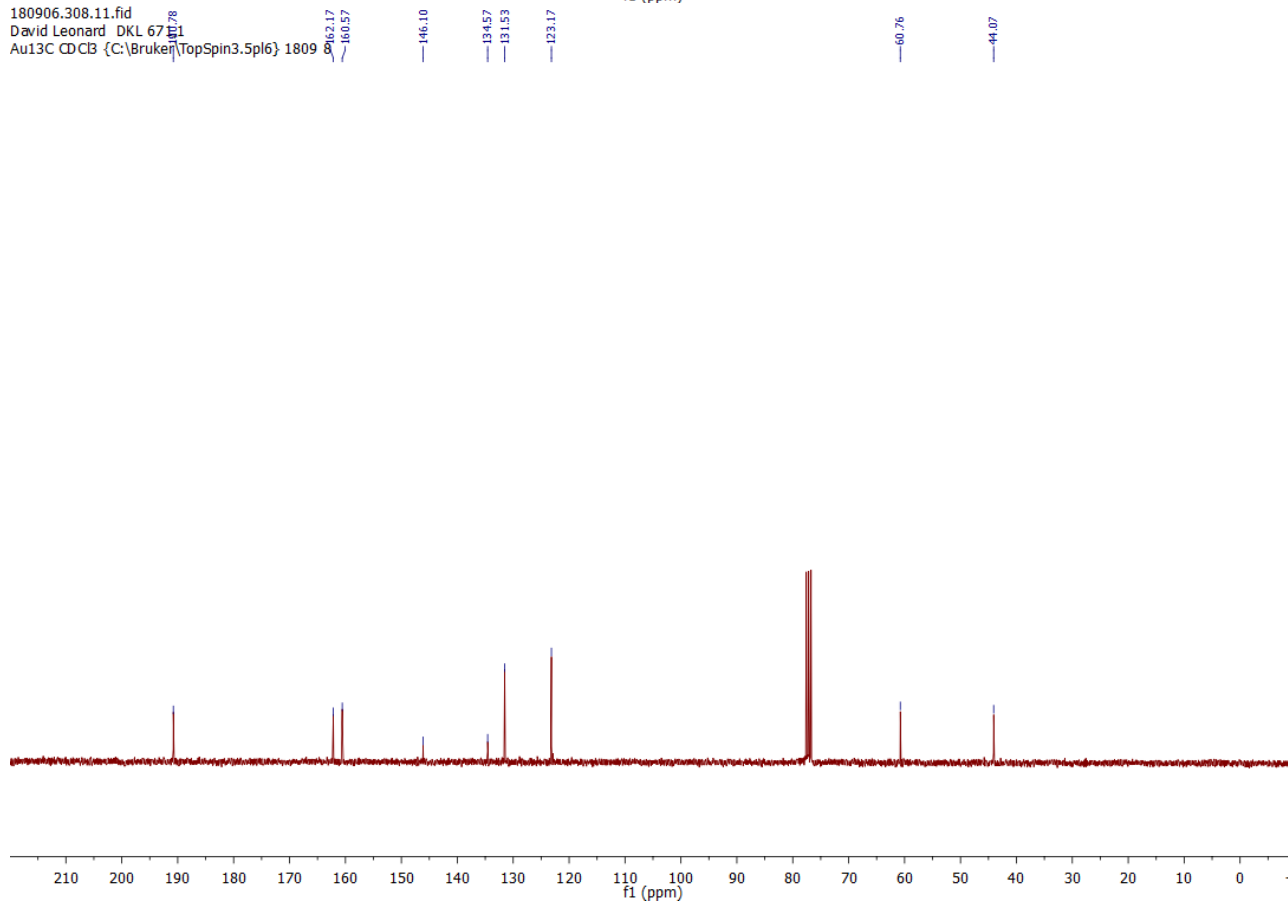

# Original spectra for **8b**:

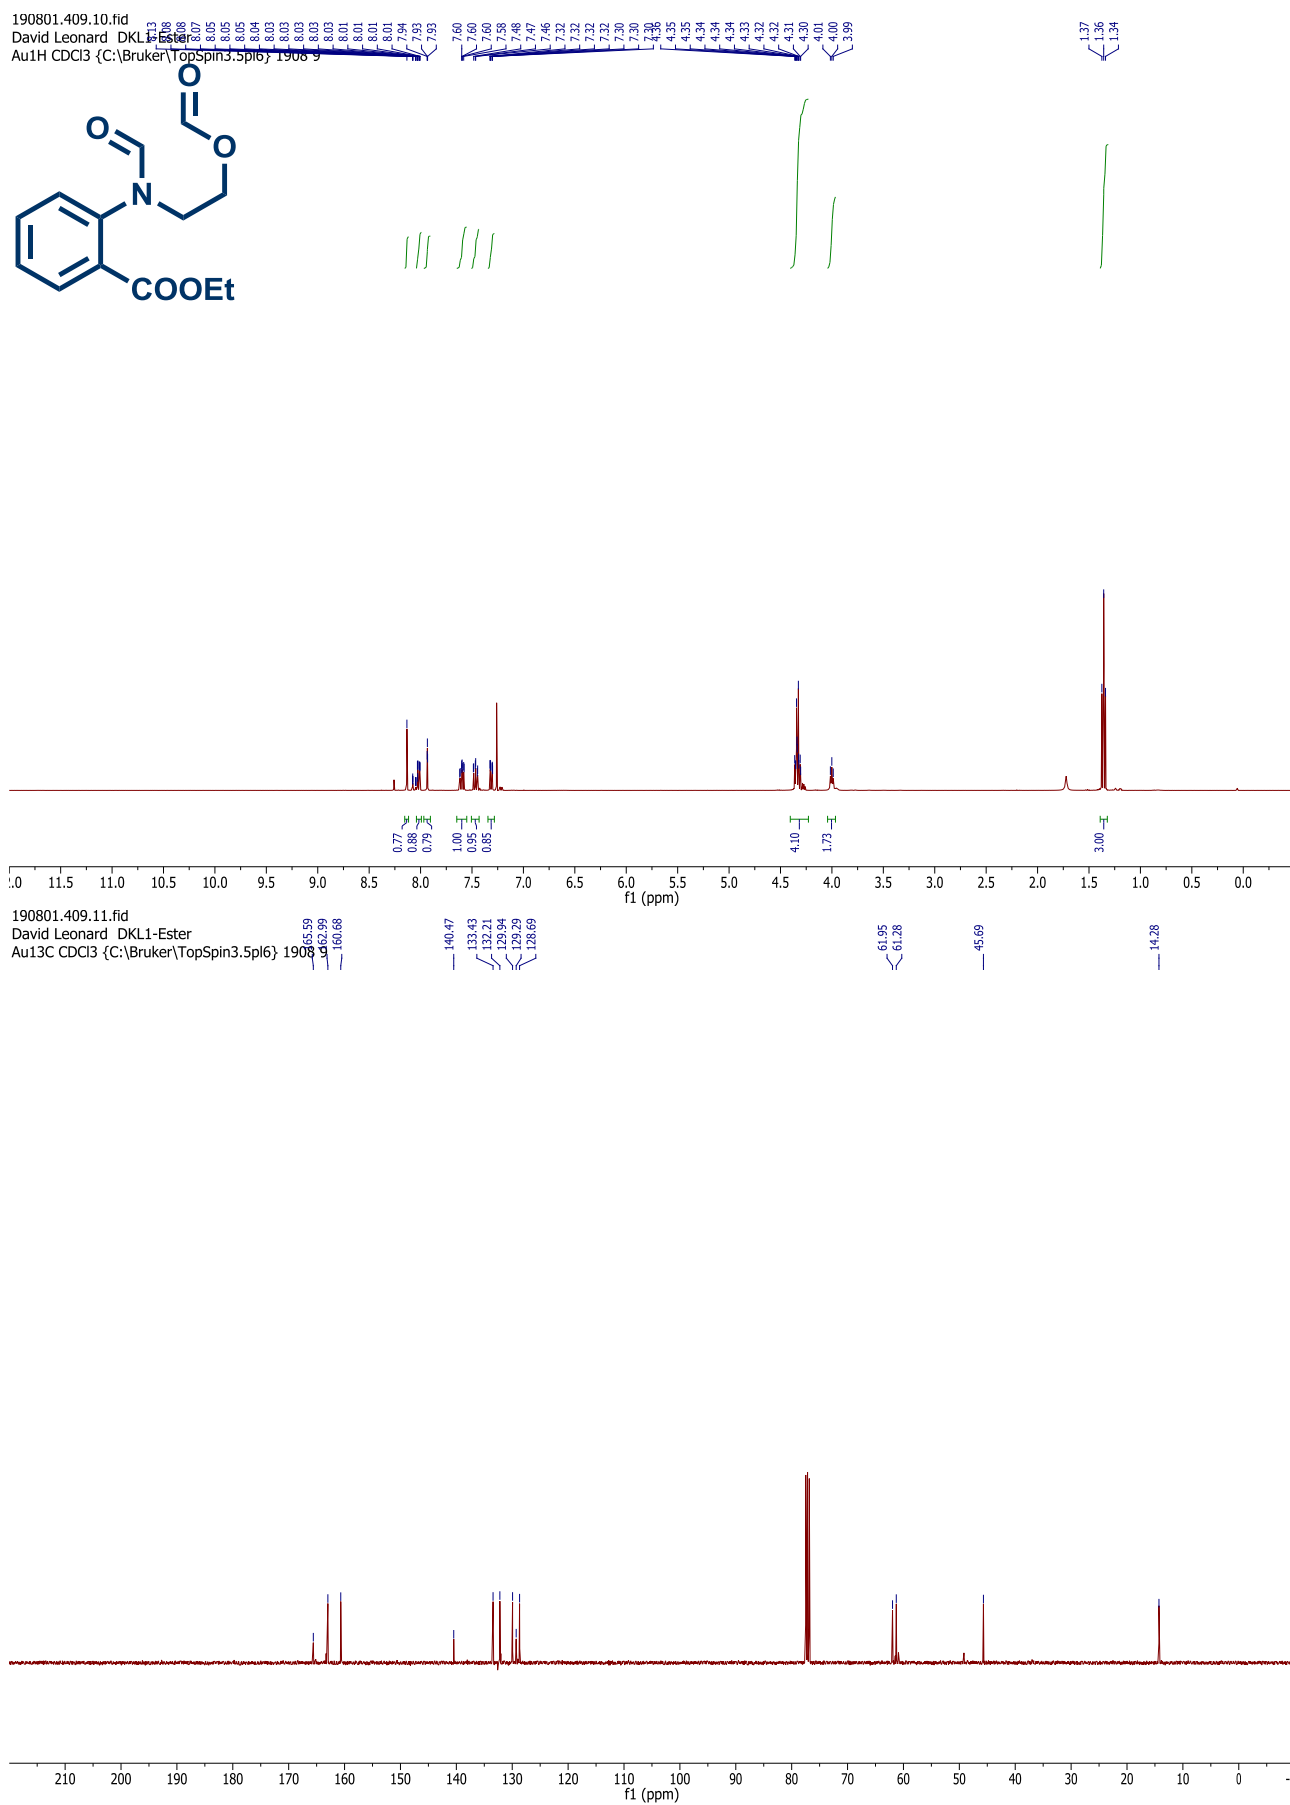



# Original spectra for **9b**:

180515.f312.10.fid  
Wu Li Wu-4-133  
PROTON CDCl<sub>3</sub> {C:\Bruker\TopSpin3.5pl6} 1805 12

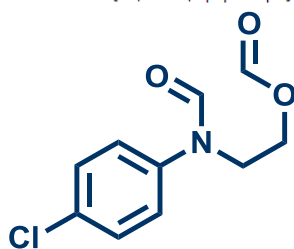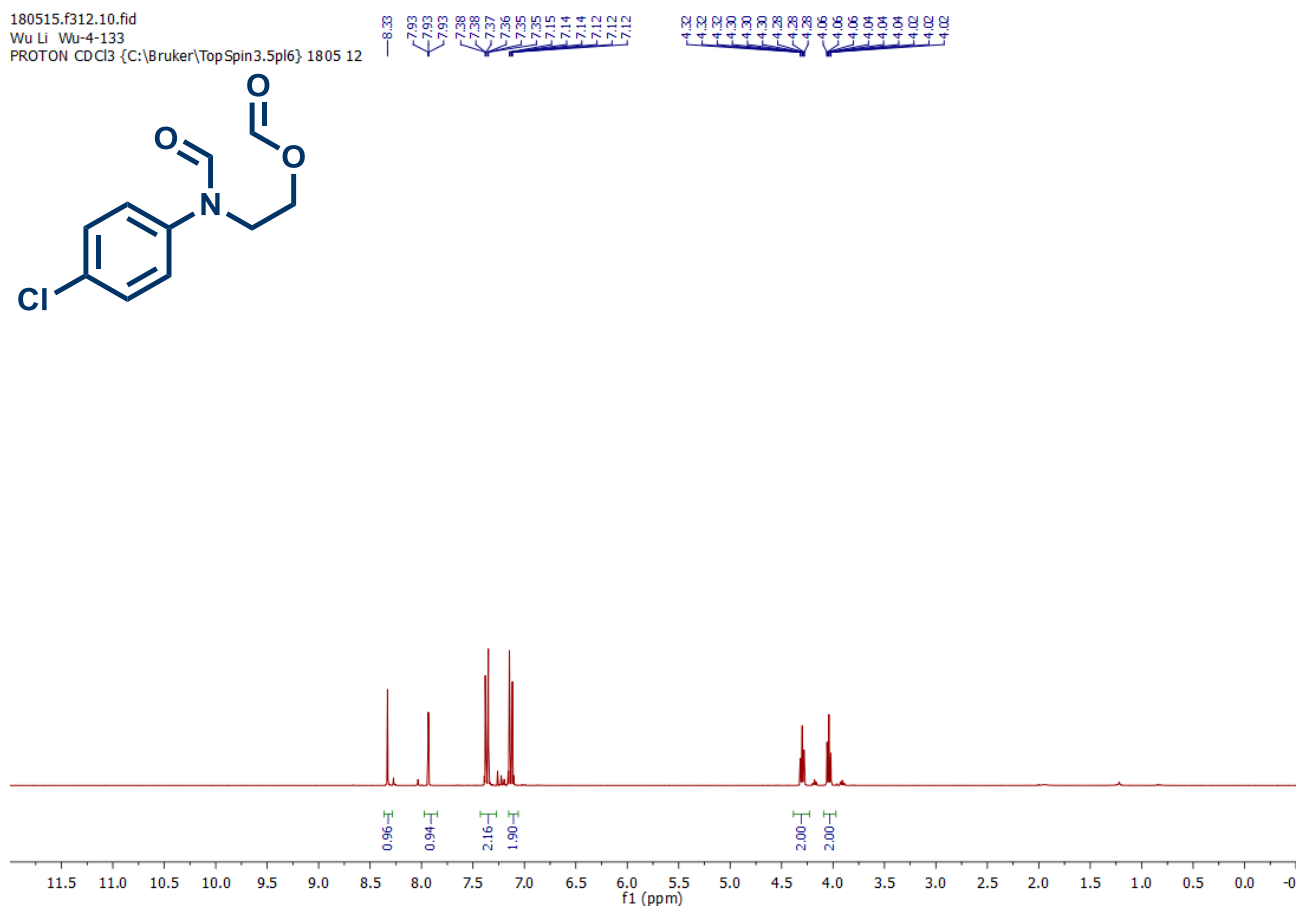

180515.f312.11.fid  
Wu Li Wu-4-133  
C13CPD CDCl<sub>3</sub> {C:\Bruker\TopSpin3.5pl6} 1805 12

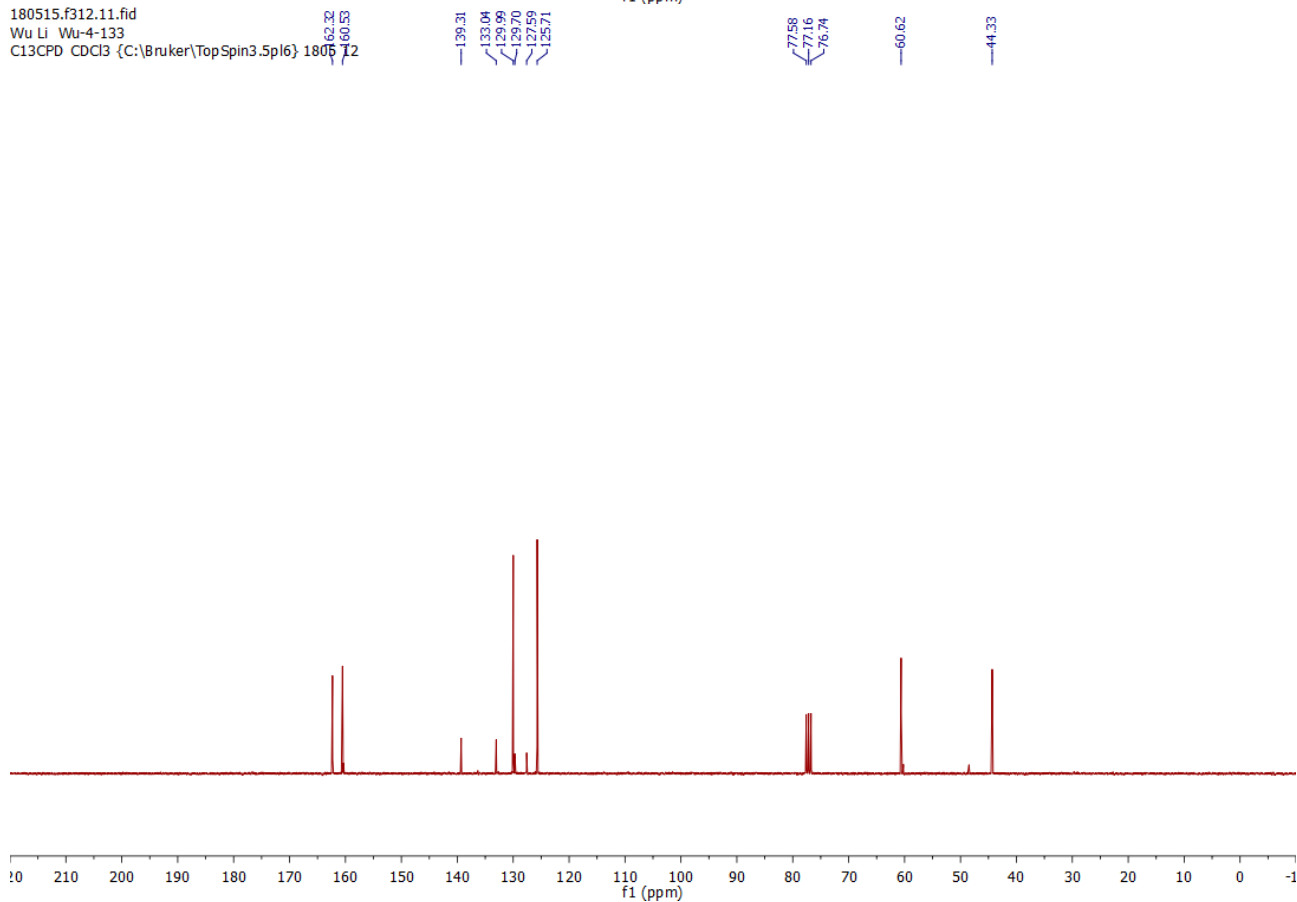

# Original spectra for **10b**:

180515.f313.10.fid  
Wu Li Wu-4-135  
PROTON CDCl<sub>3</sub> {C:\Bruker\TopSpin3.5pl6} 1805 13

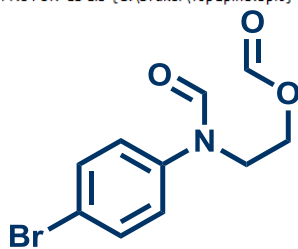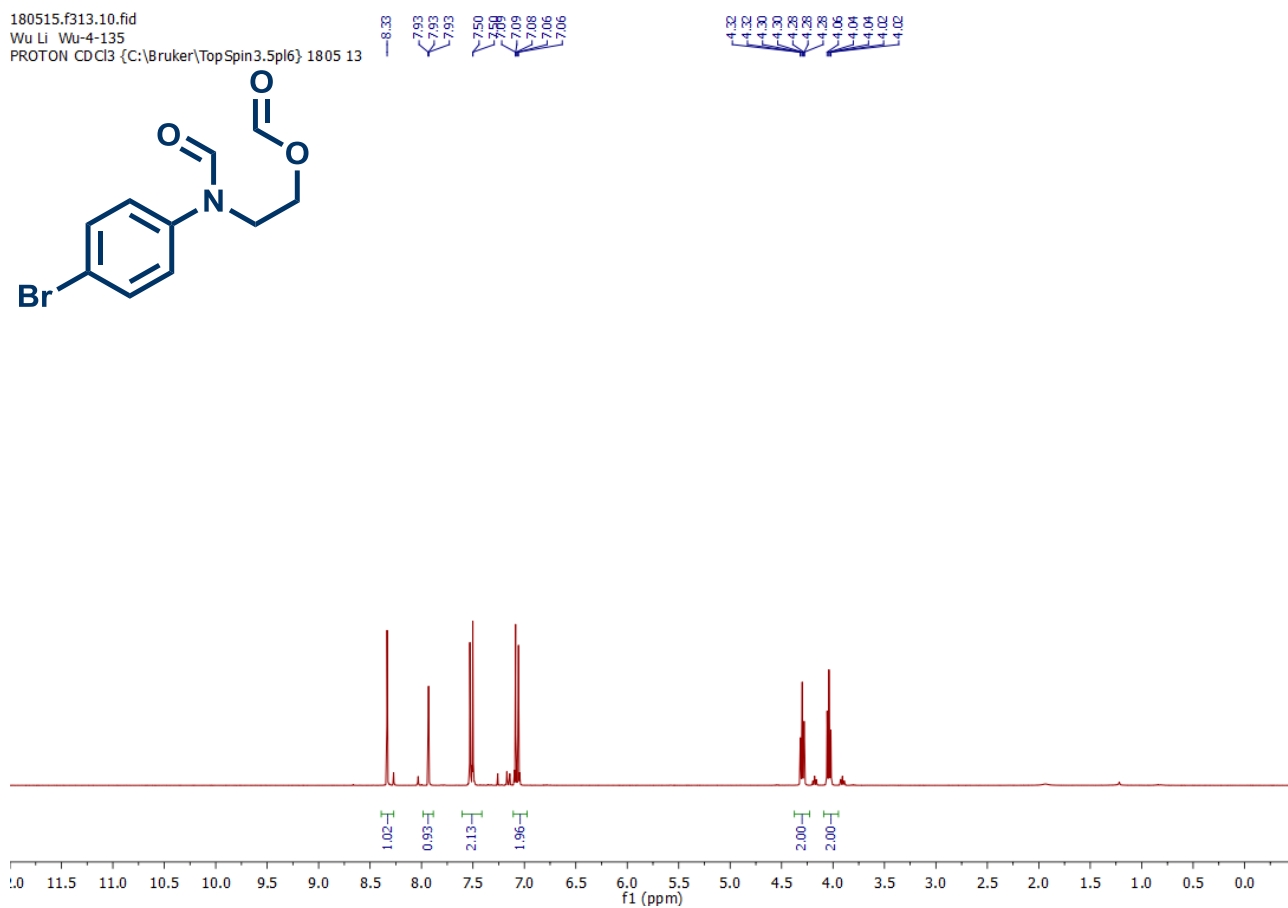

180515.f313.11.fid  
Wu Li Wu-4-135  
C13CPD CDCl<sub>3</sub> {C:\Bruker\TopSpin3.5pl6} 1805 13

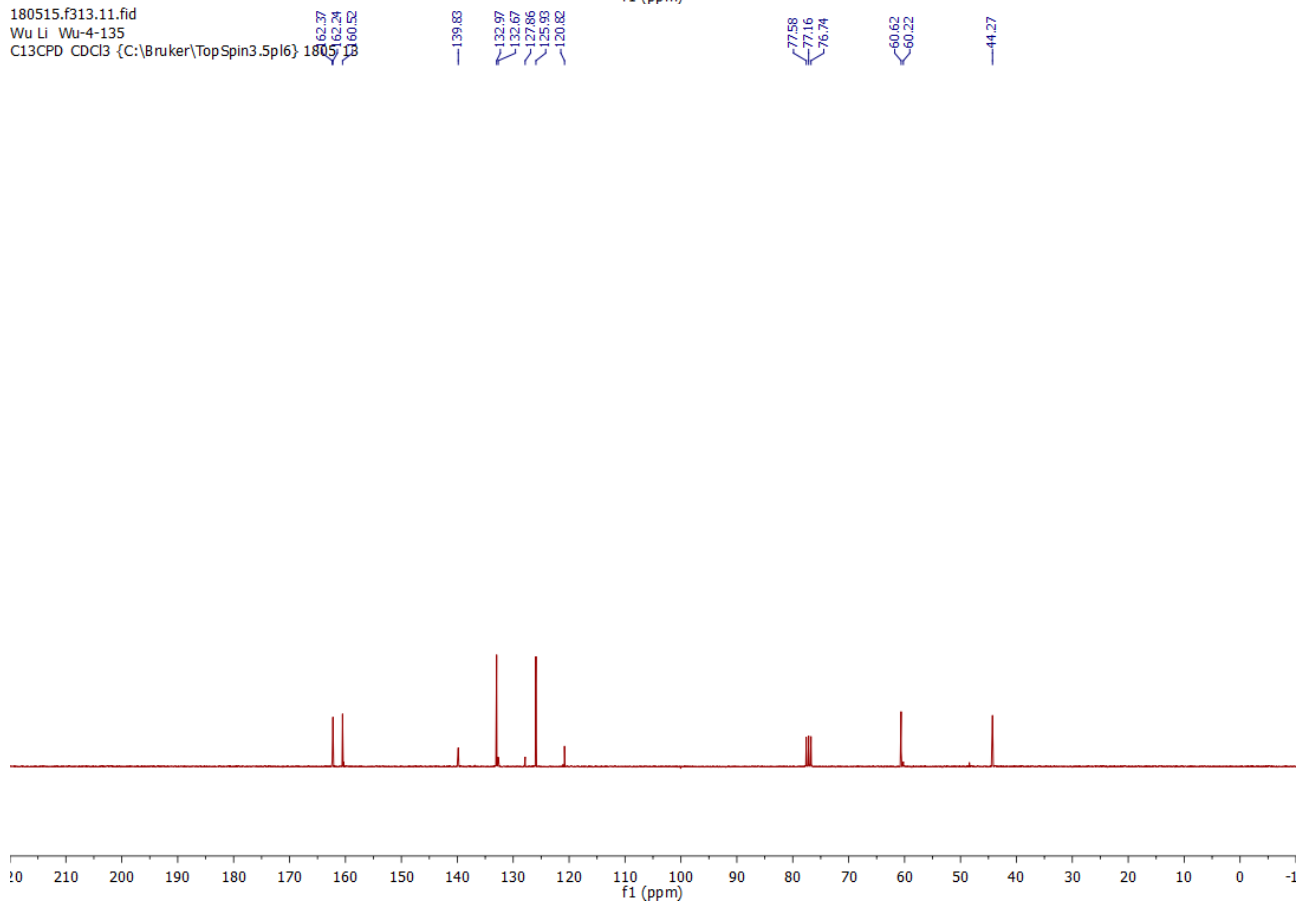

# Original spectra for **11b**:

190627.f336.10.fid  
David Leonard DKL1-124-C  
PROTON CDCl<sub>3</sub> {C:\Bruker\TopSpin3.6.0} 1906 36

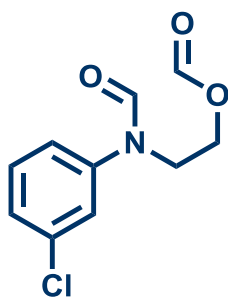

8.40  
7.98  
7.98  
7.97  
7.97  
7.36  
7.36  
7.34  
7.34  
7.32  
7.31  
7.31  
7.29  
7.28  
7.28  
7.22  
7.22  
7.12  
7.12  
7.11  
7.11  
7.09  
7.09  
4.36  
4.34  
4.32  
4.10  
4.08  
4.06

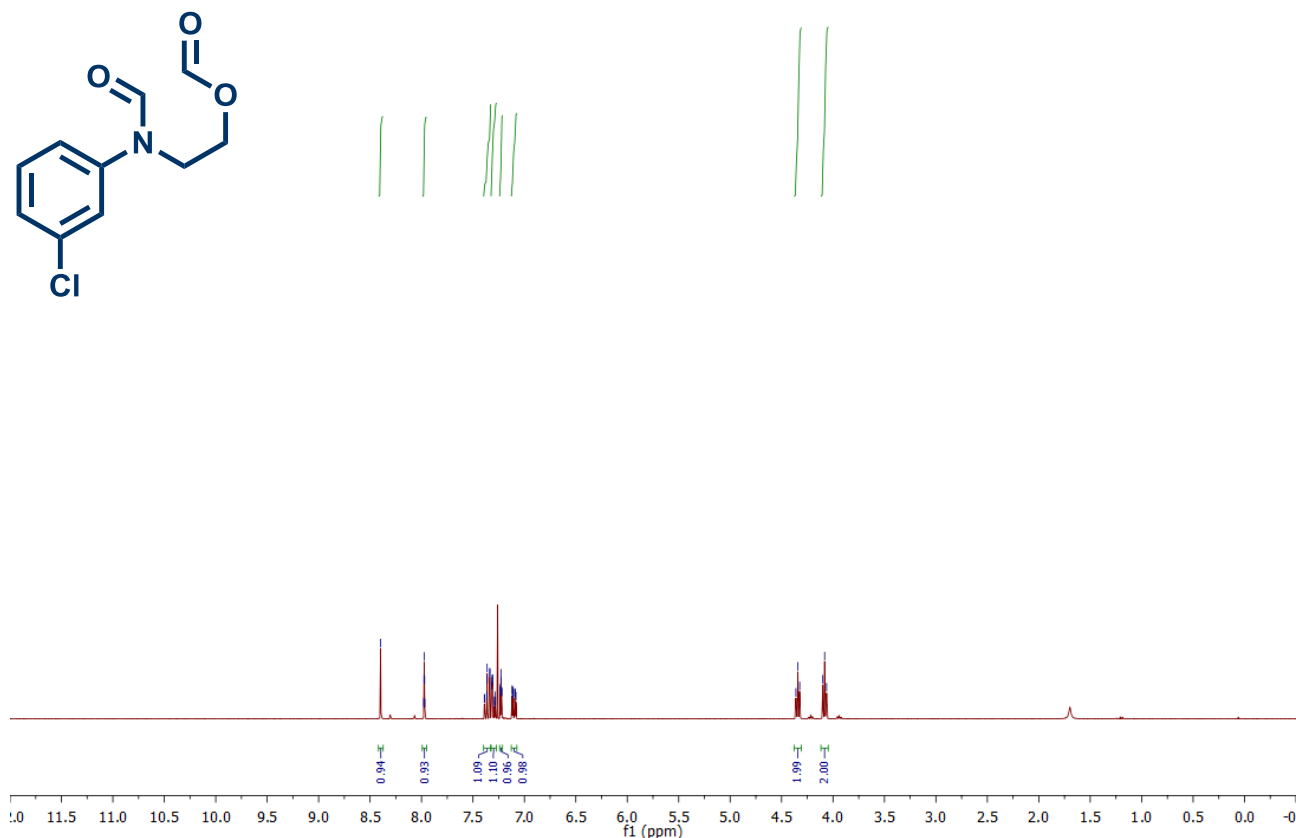

190627.f336.11.fid  
David Leonard DKL1-124-C  
C13CPD CDCl<sub>3</sub> {C:\Bruker\TopSpin3.6.0} 1906 36

162.39  
160.60  
142.07  
135.59  
130.94  
127.56  
124.55  
122.44

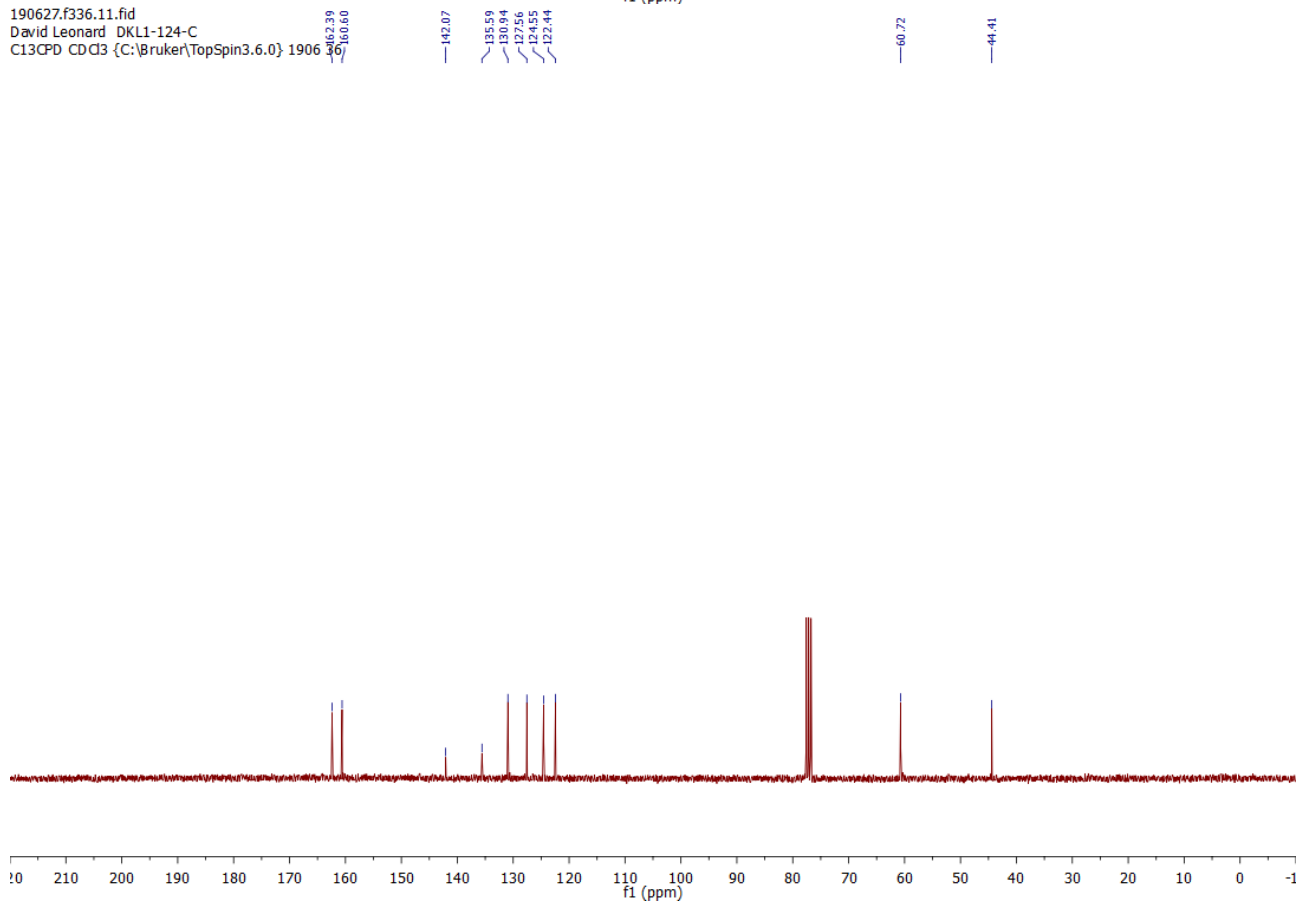

# Original spectra for **12b**:

180829.337.10.fid  
David Leonard WL-678\_2  
Au1H CDCl<sub>3</sub> {C:\Bruker\TopSpin3.5pl6} 1808 37

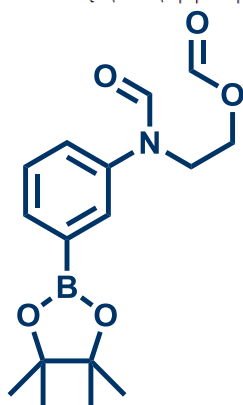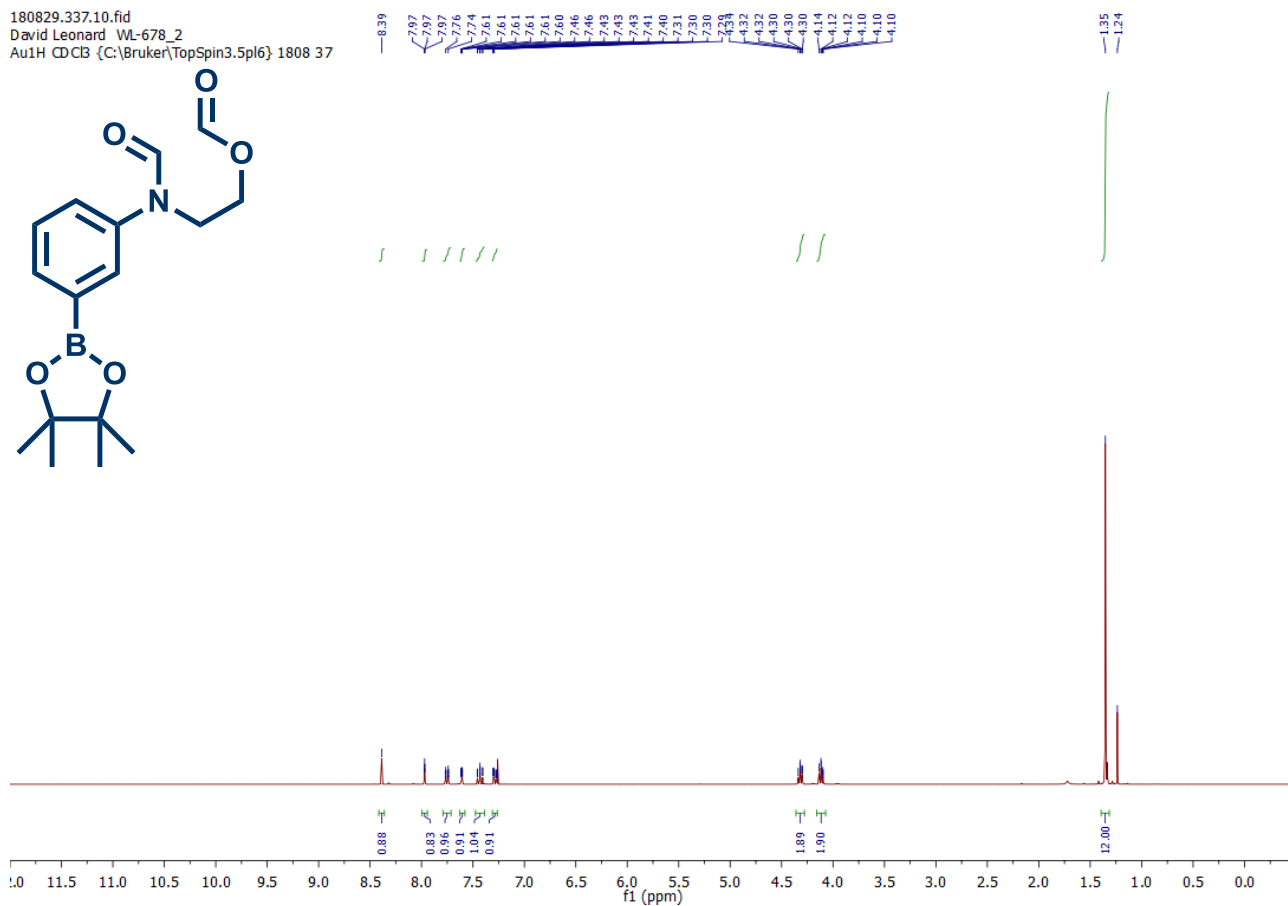

180829.337.11.fid  
David Leonard WL-678\_2  
Au13C CDCl<sub>3</sub> {C:\Bruker\TopSpin3.5pl6} 1808 37

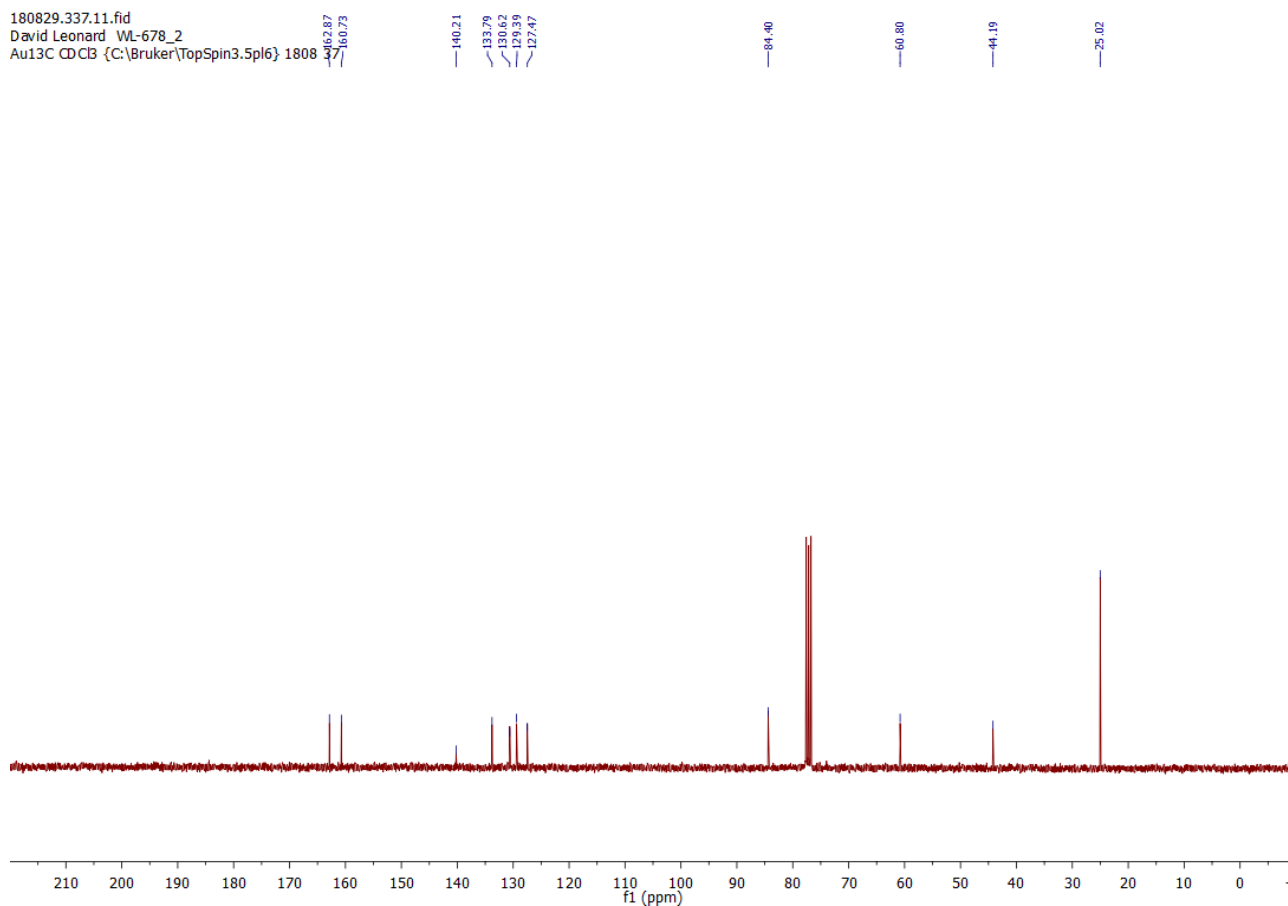

# Original spectra for **13b**:

180906.306.10.fid  
David Leonard DKL 768,1  
Au1H CDCl<sub>3</sub> {C:\Bruker\TopSpin3.5pl6} 1809 6

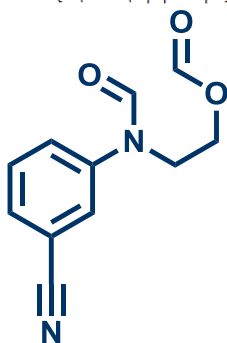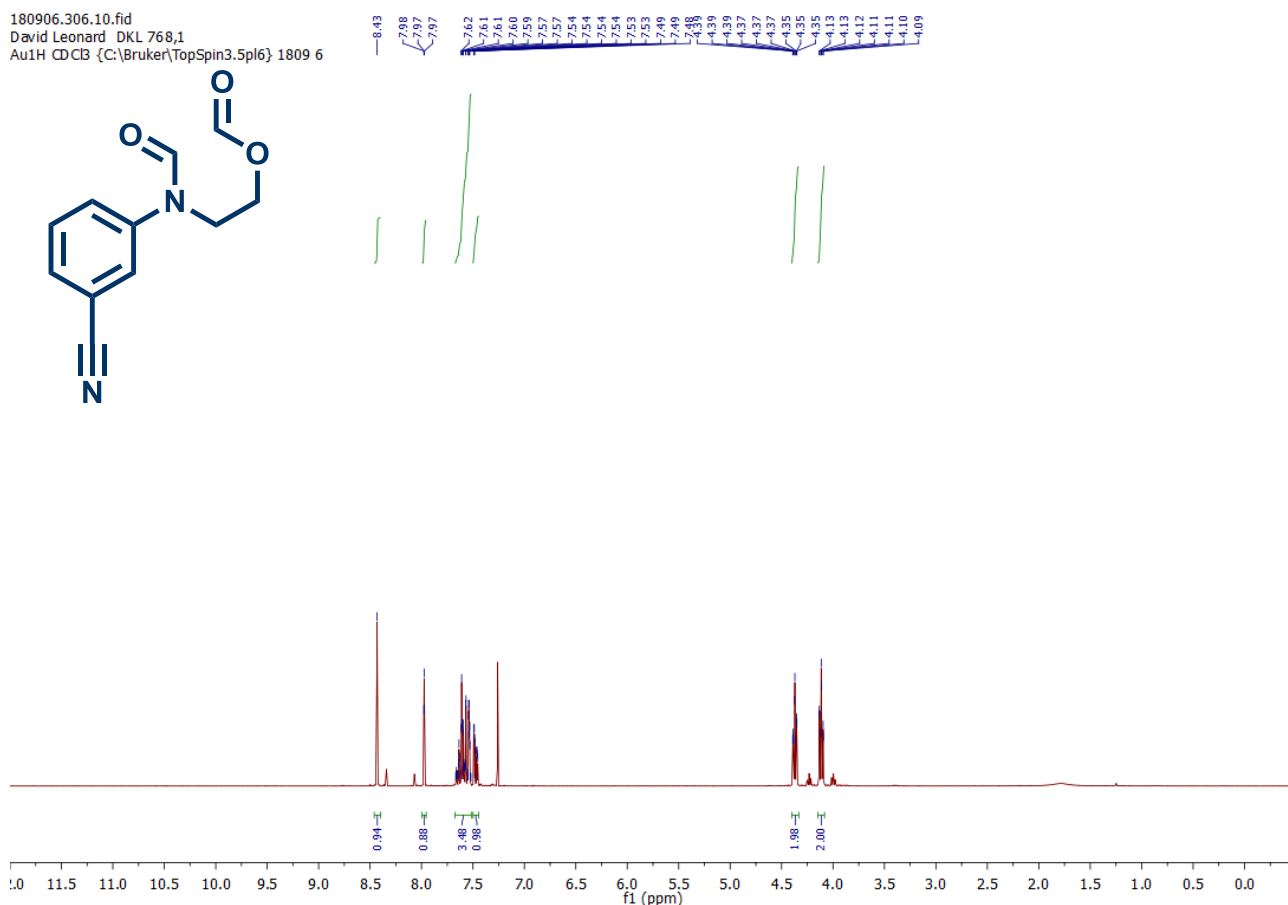

180906.306.11.fid  
David Leonard DKL 768,1  
Au13C CDCl<sub>3</sub> {C:\Bruker\TopSpin3.5pl6} 1809 6

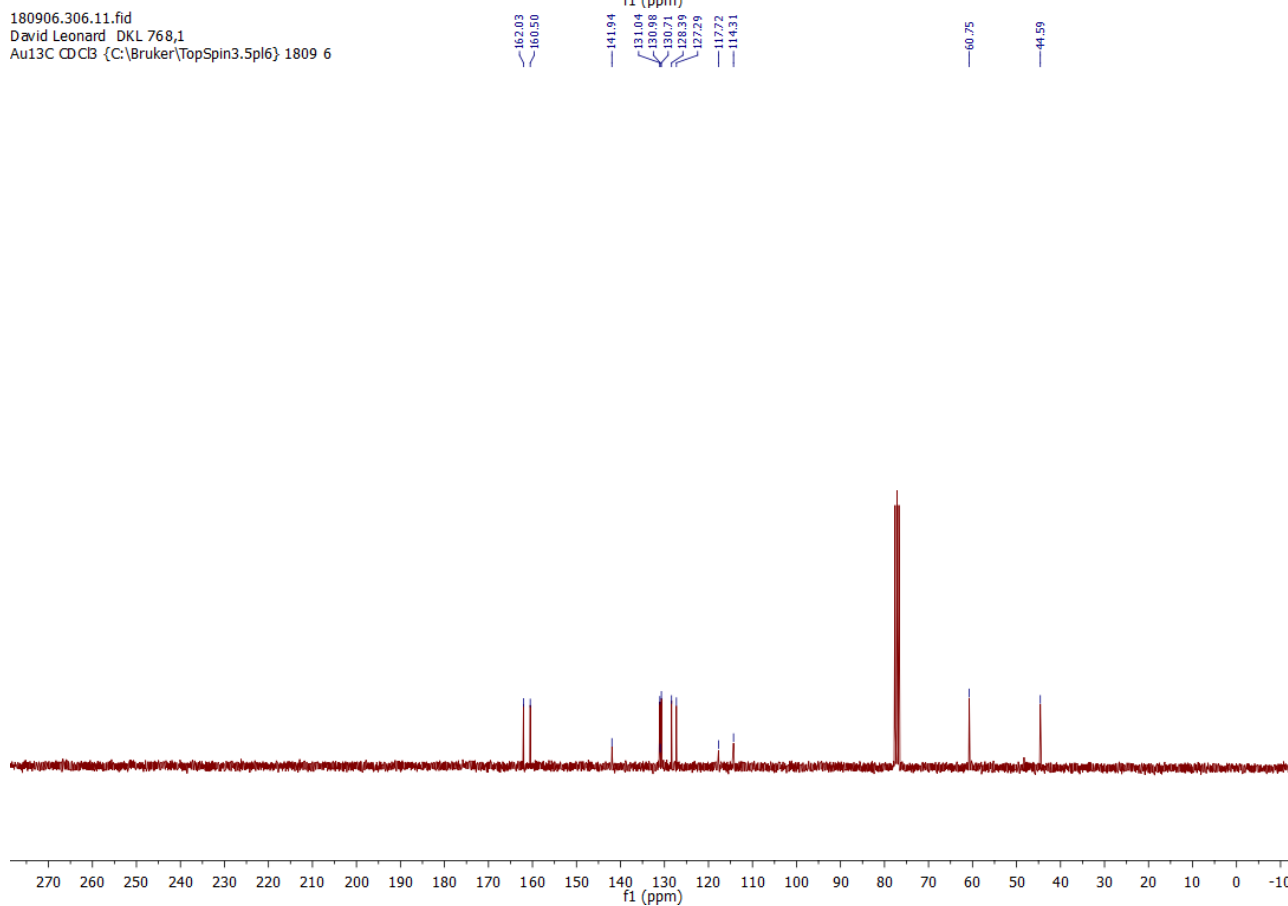

# Original spectra for **14b**:

180917.424.10.fid  
Leonard/ DKL-847.1  
Au1H CDCl<sub>3</sub> {C:\Bruker\TopSpin3.5pl6} 1809 24

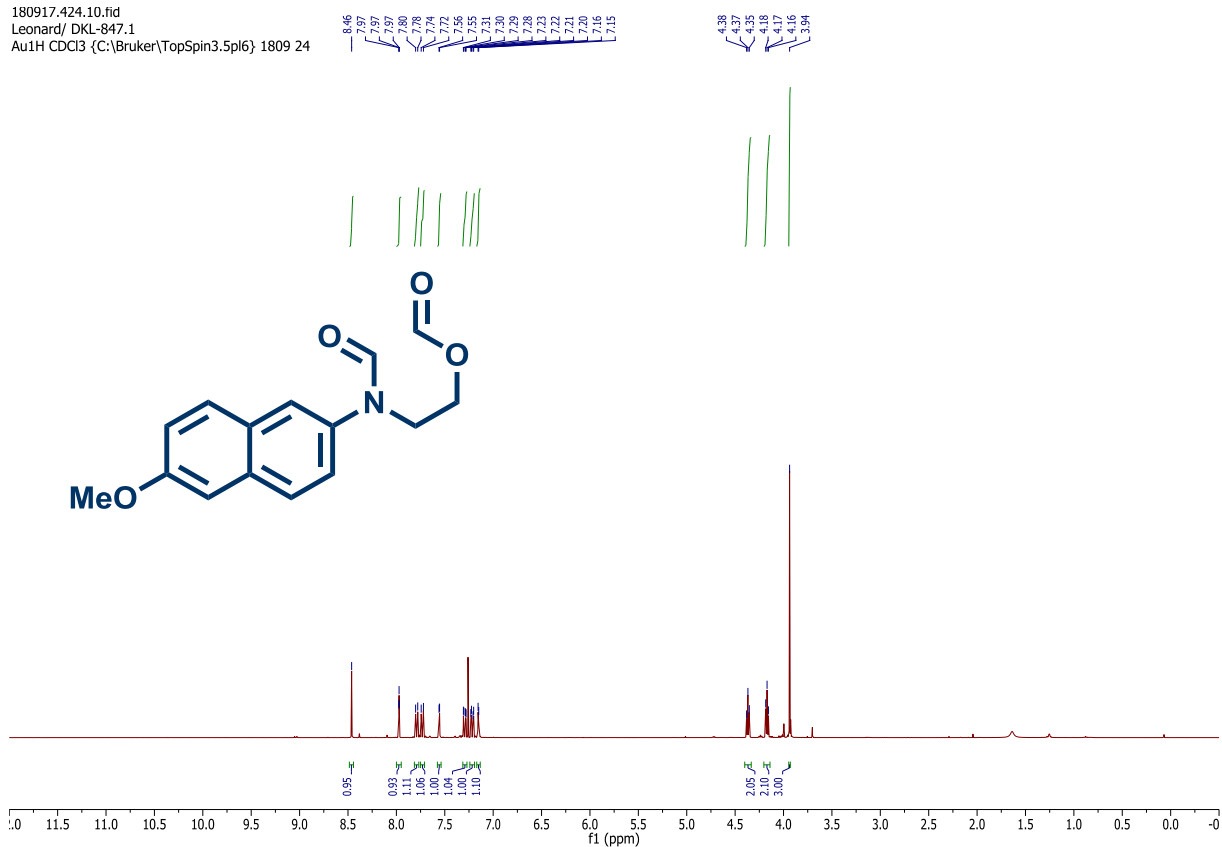

180917.424.11.fid  
Leonard/ DKL-847.1  
Au13C CDCl<sub>3</sub> {C:\Bruker\TopSpin3.5pl6} 1809 24

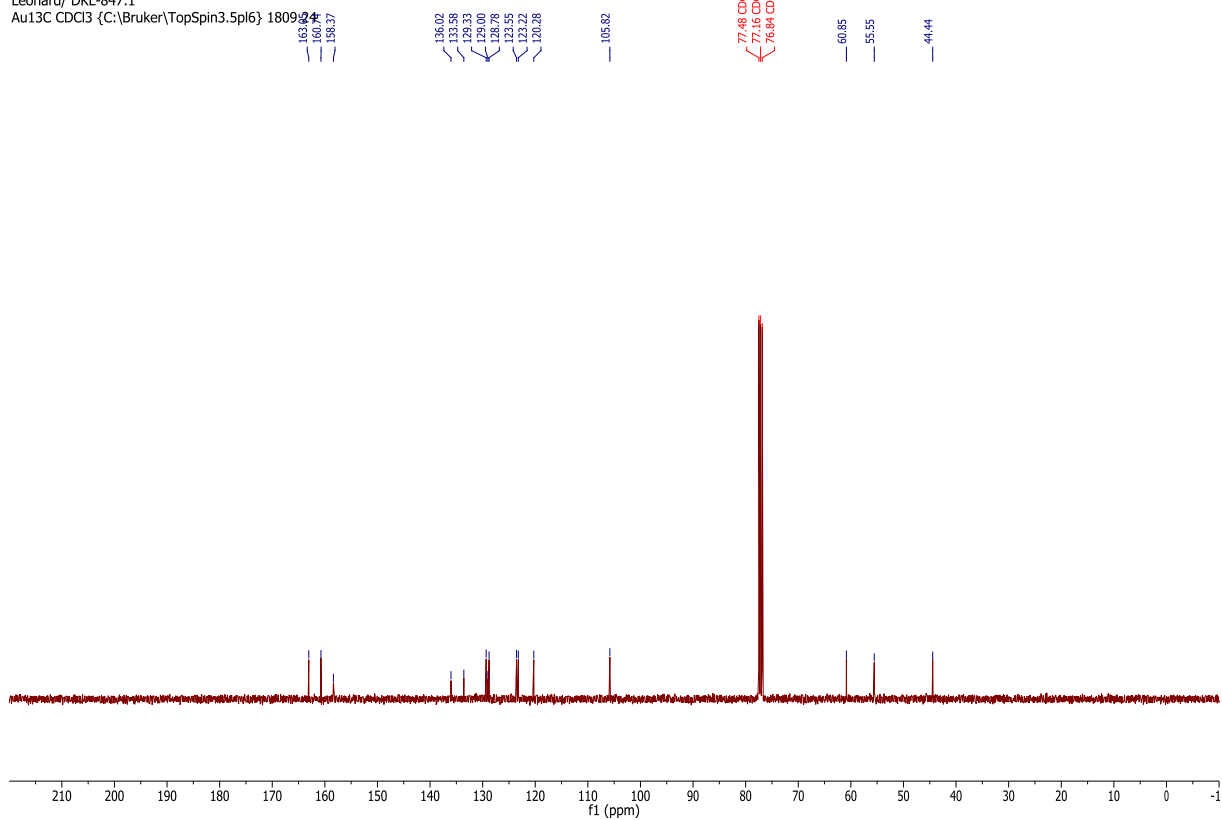

191021.f301.10.fid  
David Leonaed DKL1-144-A2  
PROTON CDCl3 {C:\Bruker\TopSpin3.6.0} 1910 1

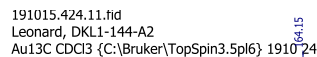

Original spectra for **16b**:

190927.f303.10.fid  
Leonard/ DKL1-134B-P  
PROTON CDCl3 {C:\Bruker\TopSpin3.6.0} 1909 3

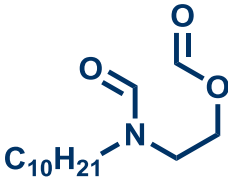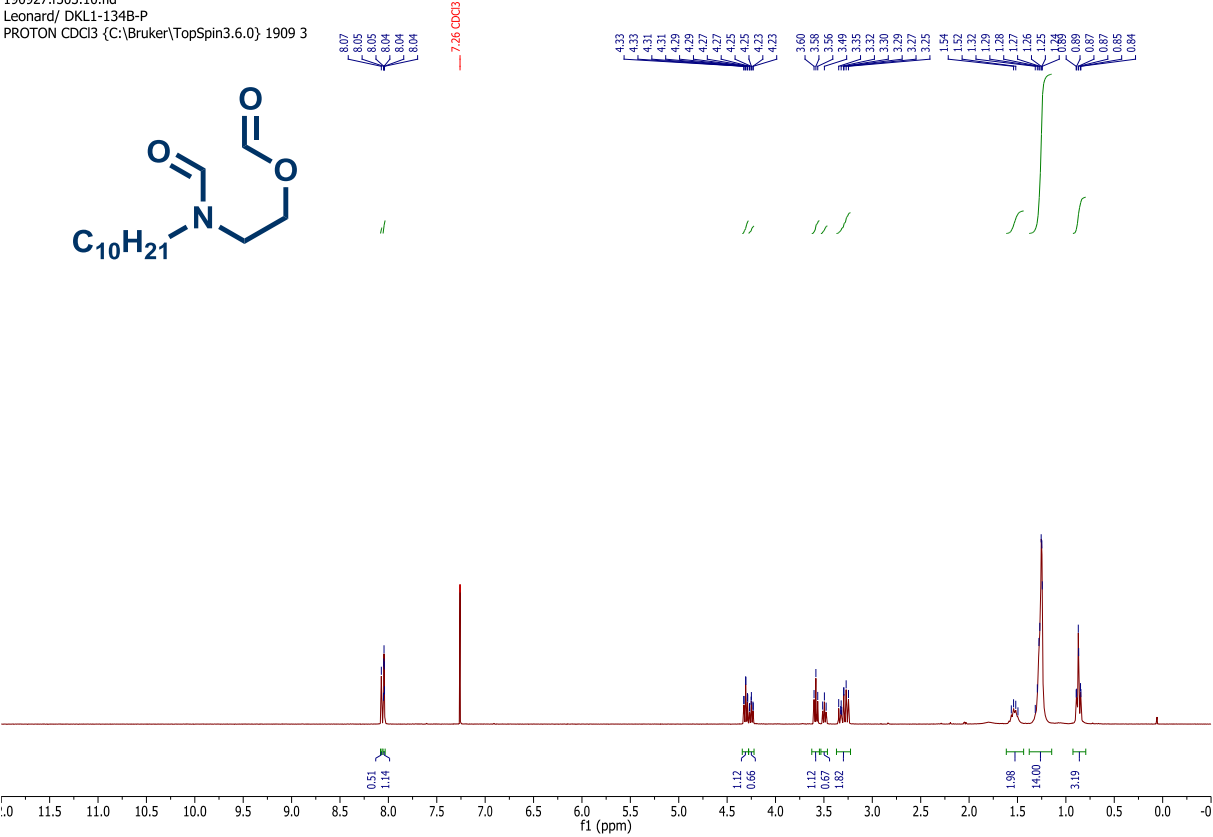

190927.f303.11.fid  
Leonard/ DKL1-134B-P  
C13CPD CDCl3 {C:\Bruker\TopSpin3.6.0} 1909 3

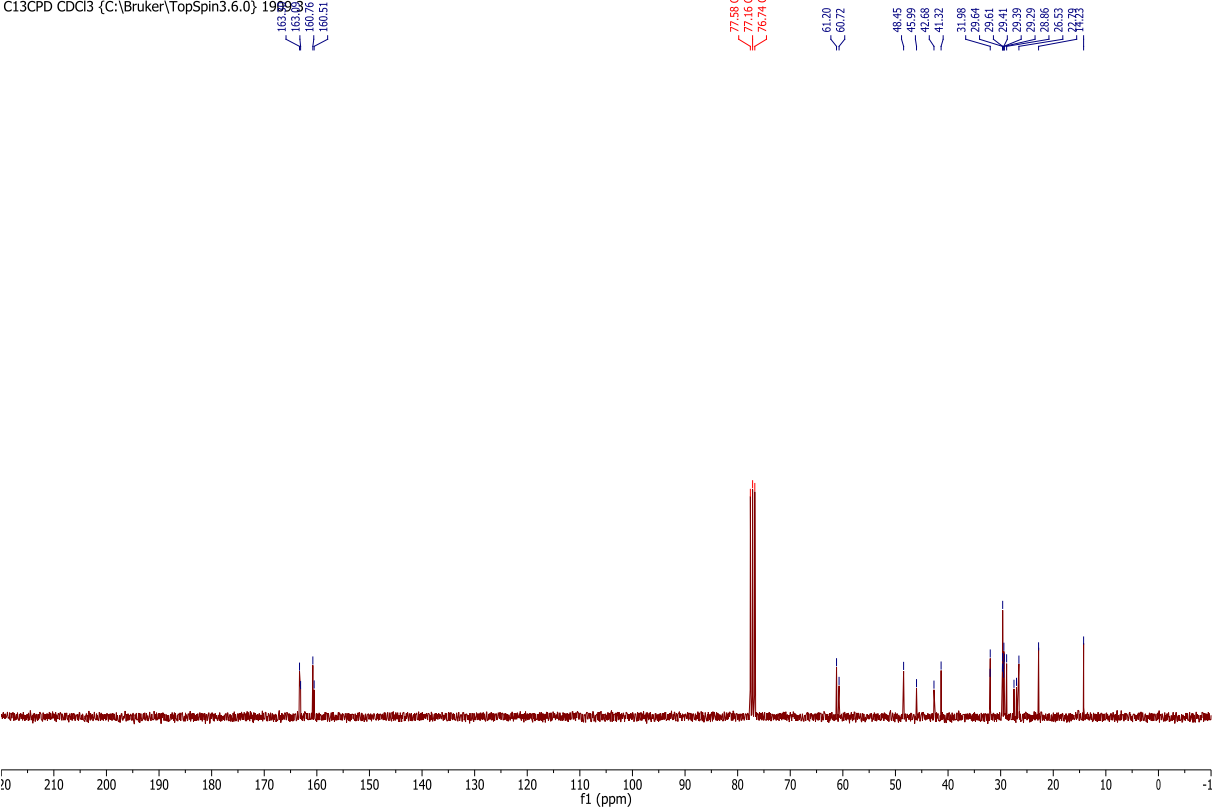



# Original spectra for **17b**:

190503.f308.10.fid  
David Leonard/ DKL-LIN-2  
PROTON DMSO {C:\Bruker\TopSpin3.6.0\1905 8

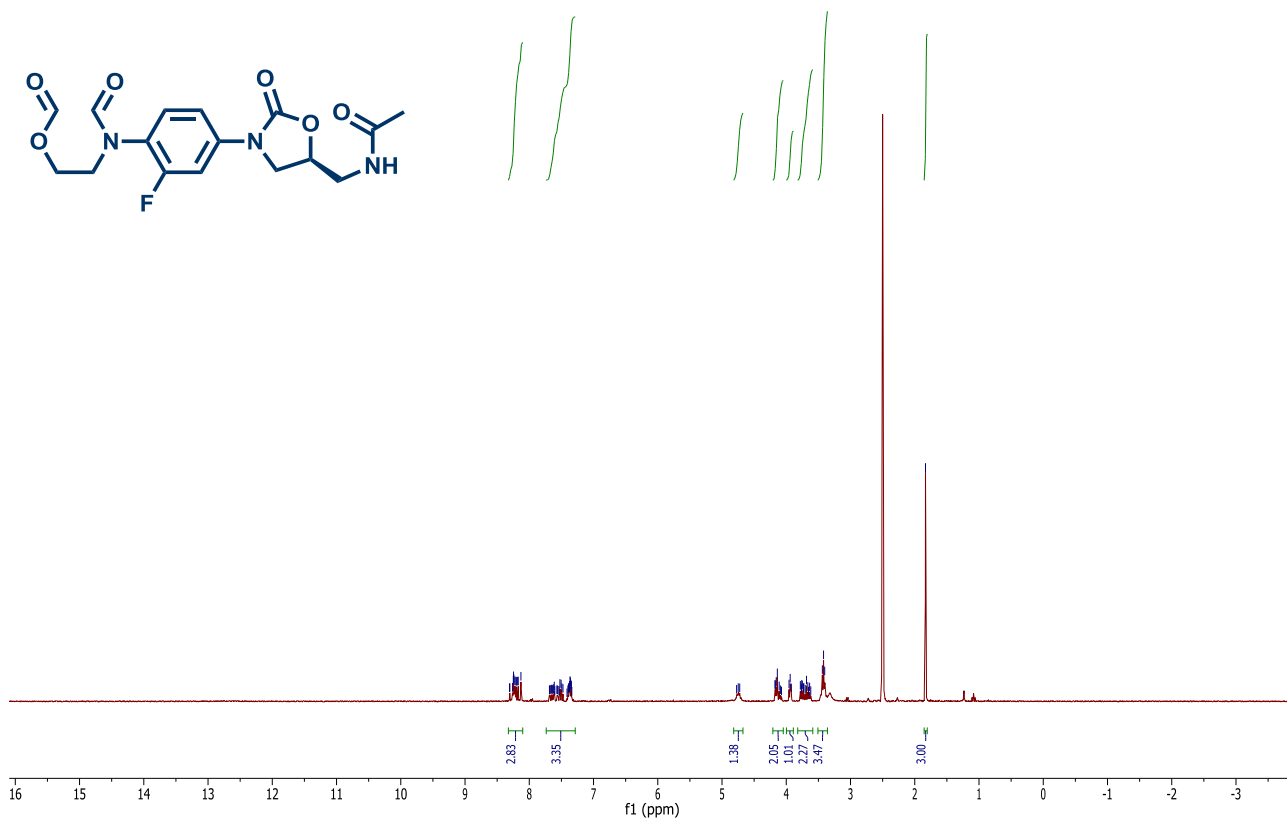

190808.f336.10.fid  
Leonard/ DKL-LIN-2  
C13CPD DMSO {C:\Bruker\TopSpin3.6.0\1908 36

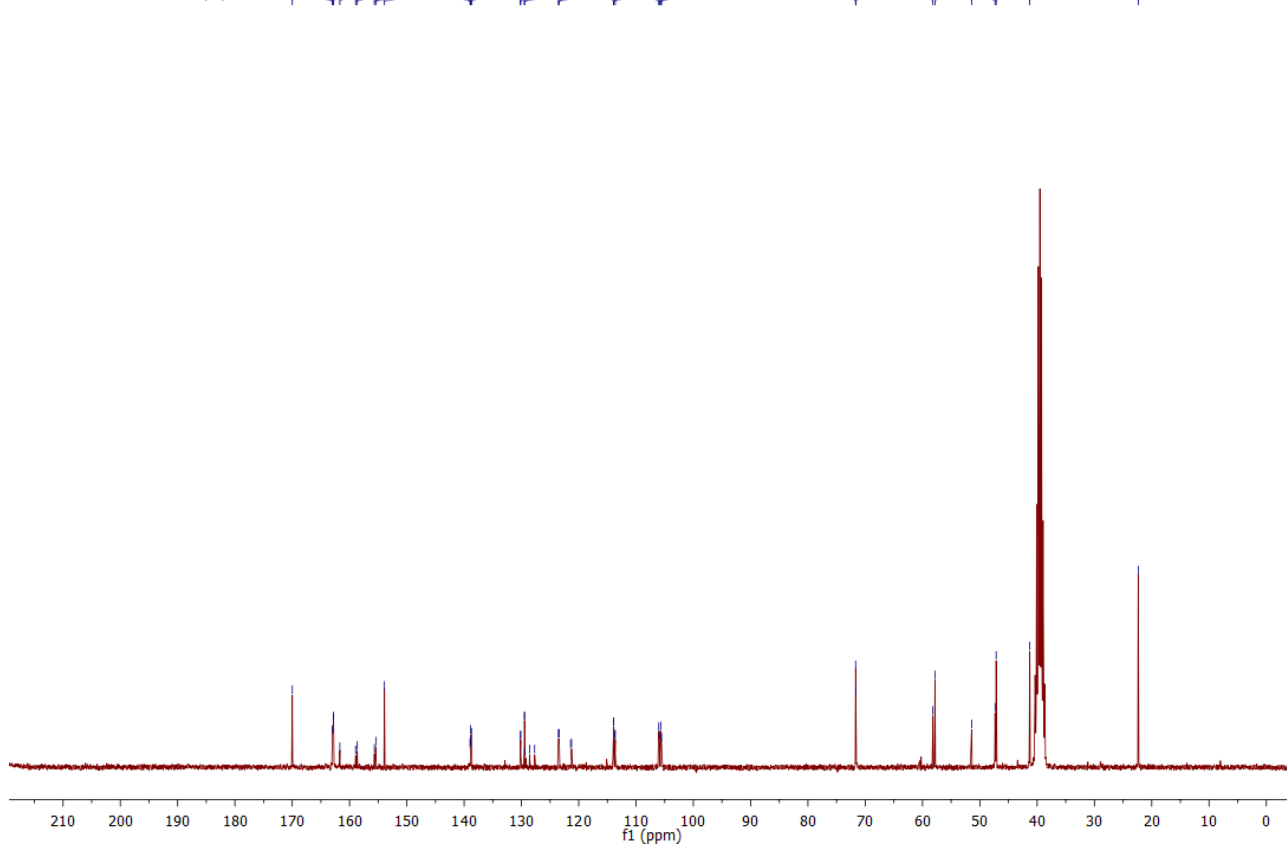

190502.319.12.ftd  
David Leonard DKL1-42-DMSO  
Au19F DMSO {C:\Bruker\TopSpin3.6.0} 1905 19

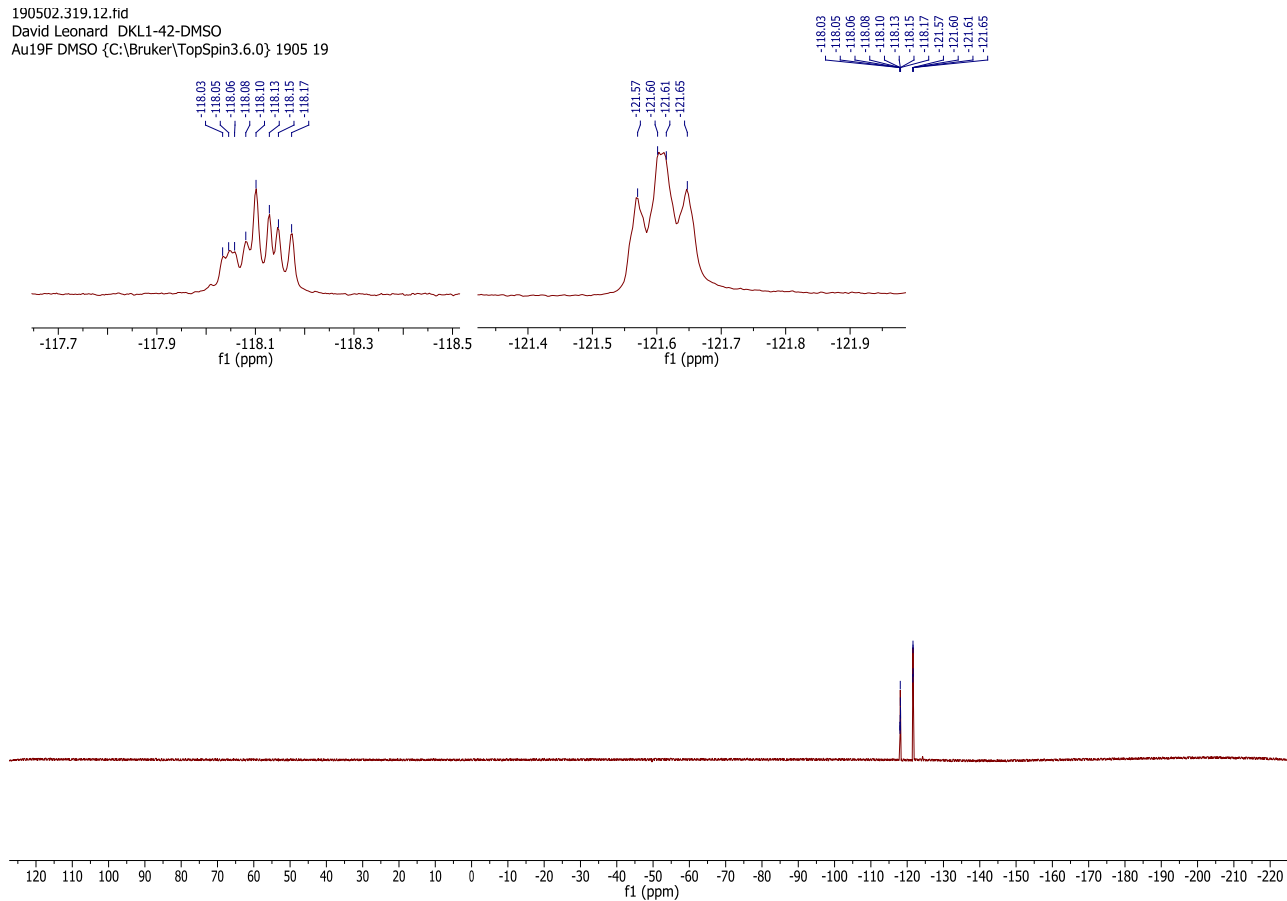

## 10. GC-FID CALIBRATIONS

### GC-FID Calibration for 1a:

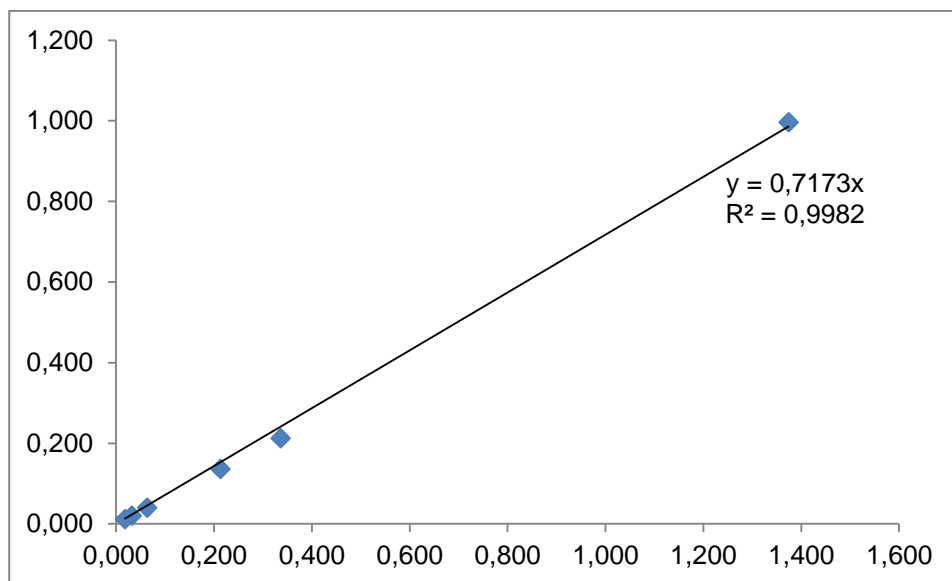

Response factor = 0,7173 as determined using ***n*-dodecane** as an internal standard.

### GC-FID Calibration for 1b:

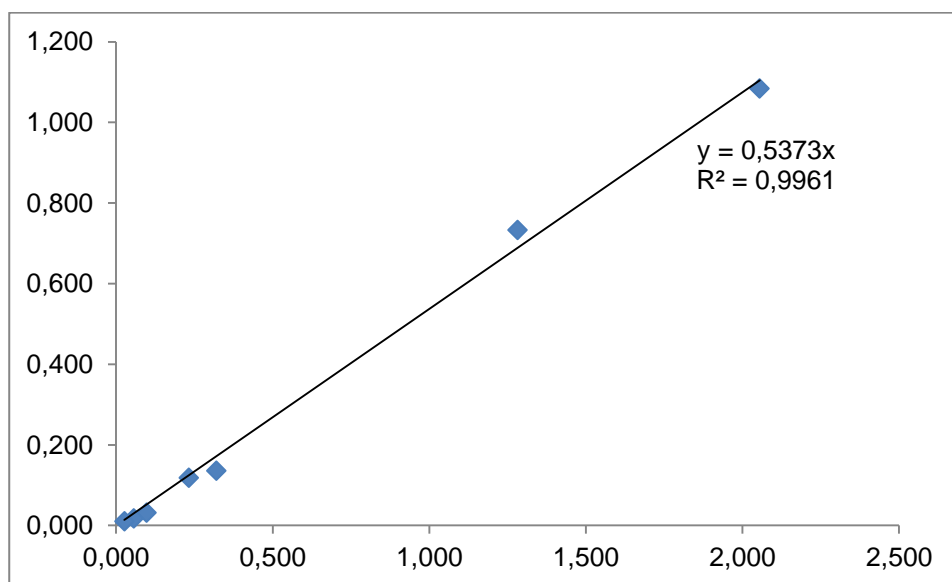

Response factor = 0,5373 as determined using ***n*-dodecane** as an internal standard.

## 11. REFERENCES

1. Ma, D.; Cai, Q; Zhang, H., Mild Method for Ullmann Coupling Reaction of Amines and Aryl Halides. *Org. Lett.*, **2003**, 5, 2453–2455.
2. Li, W.; Liu, W.; Leonard, D. K.; Rabeah, J.; Junge, K.; Brückner, J.; Beller, M., Practical Catalytic Cleavage of C(sp<sup>3</sup>)-C(sp<sup>3</sup>) Bonds in Amines. *Angew. Chem., Int. Ed.* **2019**, 131, 10803-10807.
